# Supplementary material for: Automated design of synthetic microbial communities
Source: PubMed Central journal article supplement (PMC7844305; doi:10.1038/s41467-020-20756-2), 2021-01-28

# Supplementary information: Automated design of synthetic microbial communities

Behzad D. Karkaria,<sup>1</sup> Alex J. H. Fedorec,<sup>1</sup> and Chris P. Barnes<sup>1,2\*</sup>

<sup>1</sup>Department of Cell & Developmental Biology, University College London, London, WC1E 6BT, UK

<sup>2</sup>UCL Genetics Institute, University College London, London, WC1E 6BT, UK

\*To whom correspondence should be addressed;

E-mail: christopher.barnes@ucl.ac.uk

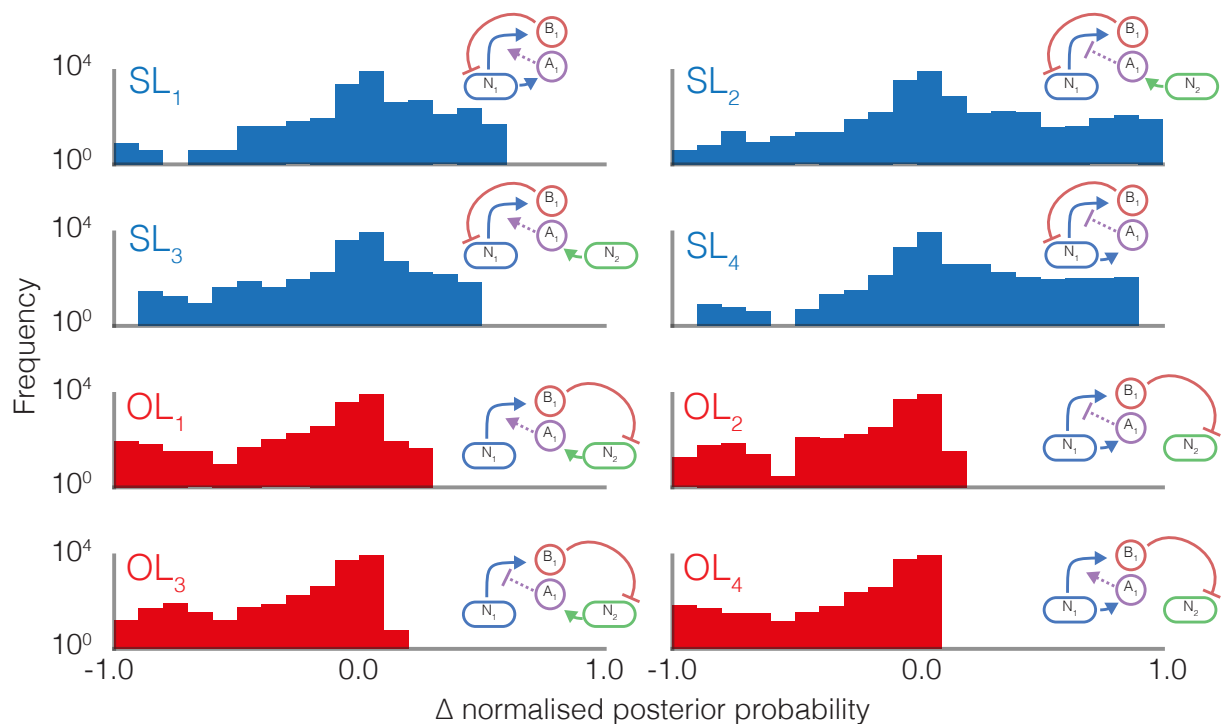

Supplementary Figure 1: Motif impact analysis in three strain model space. Histograms show the change in posterior probability when adding each motif to a model in the three strain model space.

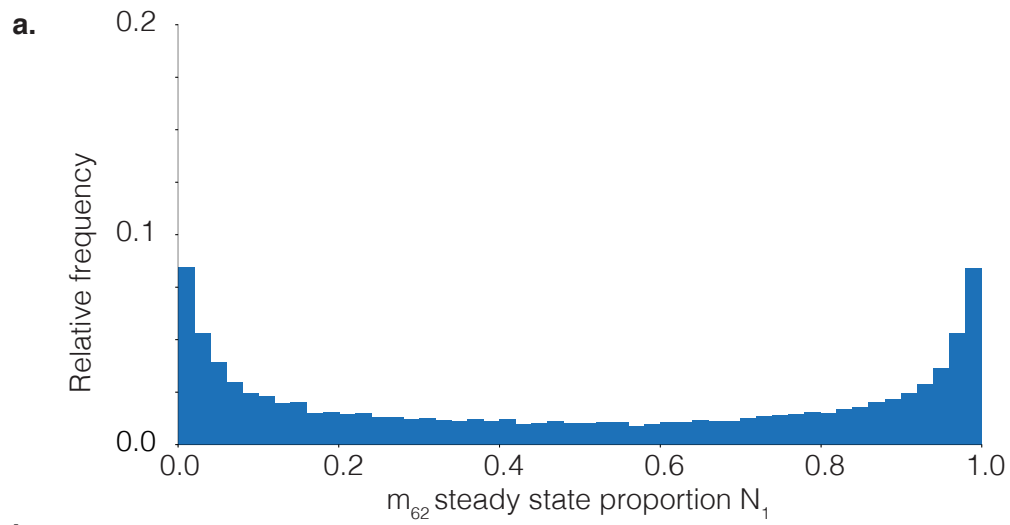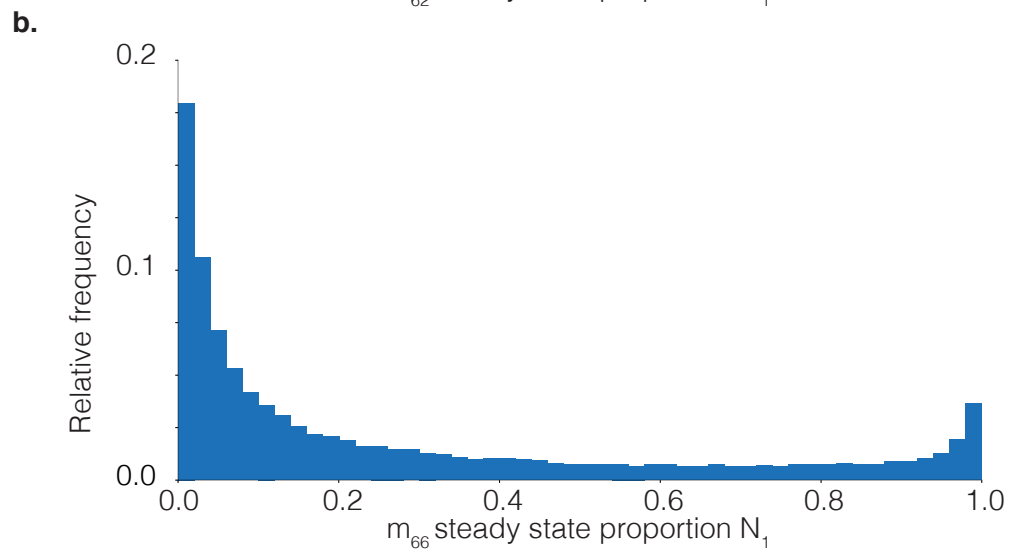

Supplementary Figure 2: Stable steady state population distribution in two strain models. **a** A histogram of the proportion of population occupied by strain  $N_1$  at stable steady for  $m_{62}$ . **b** A histogram of the proportion of population occupied by strain  $N_1$  at stable steady for  $m_{66}$ .

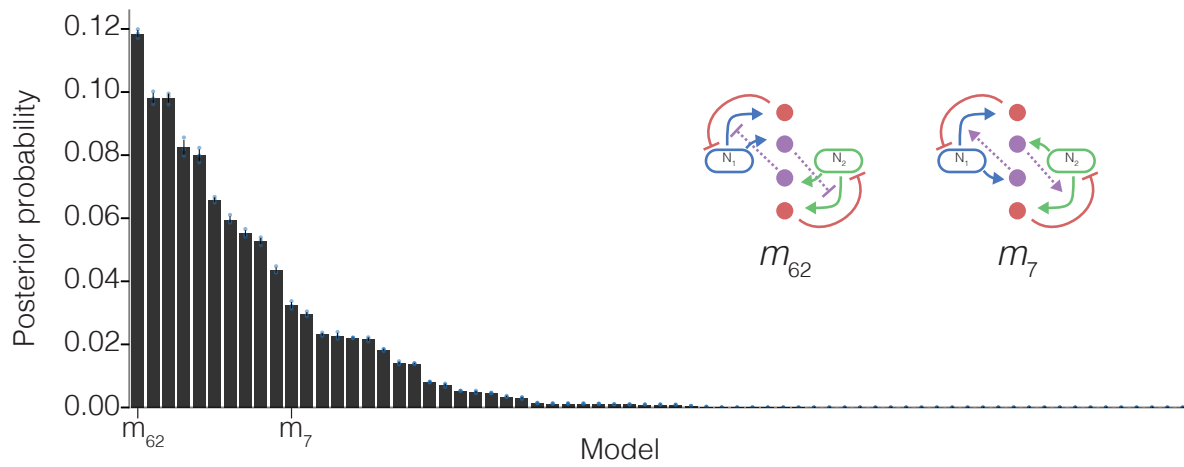

Supplementary Figure 3: Posterior probability of two strain model space in order of descending posterior probability.  $m_{62}$  and  $m_7$  are highlighted, drawing attention to two models with and without interdependence between strains. The configuration of these parts is what differentiates the robustness of these two models for the stable steady state objective.

---

**Supplementary Algorithm 1: Algorithm for model selection with ABC SMC**

---

```
1 Set population indicator,  $t = 0$ 
2 Set initial epsilon,  $\epsilon_t = \inf$ 
3 Set final epsilon,  $\epsilon_F = [x, y, z]$ 
4 Set particle indicator,  $i = 0$ 
5 if  $t = 0$  then
6   Sample  $m^*$  from  $\pi(m)$ 
7   Sample  $\theta^{**}$  from  $\pi(\theta(m^*))$ 
8 else if  $t > 0$  then
9   Sample particle  $\theta^*$  from previous population  $\{\theta(m^*)_{t-1}^i\}$  with weights  $w(m^*)_{t-1}$ 
10  Perturb  $\theta^*$  to obtain  $\theta^{**} \sim K_t(\theta|\theta^*)$ 
11  if  $\pi(\theta^{**}) = 0$  then
12    go to 5
13
14 Simulate,  $x^* \sim f(x|\theta^{**}, m^*)$ 
15  if  $d(x^*, x_0) > \epsilon_t$  then
16    go to 5
17
18 Set  $m_t^i = m^*$ 
19 Set  $\theta_t^i = \theta^{**}$ 
20 Calculate particle weight,  $w_t^i$ 
21  if  $t = 0$  then
22     $w_t^i = 1$ 
23  else
24     $w_t^i = \frac{\pi(\theta^{**})}{\sum_{j=1}^N w_{t-1}^j K_t(\theta_{t-1}^j|\theta^{**})}$ 
25  if  $i < N$  then
26    Set  $i = i + 1$ 
27    go to 5
28
29 Normalise weights for every  $m$ .
30 if  $\epsilon_t \neq \epsilon_T$  then
31  Update population number,  $t = t + 1$ 
32  Update  $\epsilon$  according to accepted particle distances,  $\epsilon_t = f_\epsilon()$ 
33  go to 5
```

---

Supplementary Figure 4: Two strain model space topologies

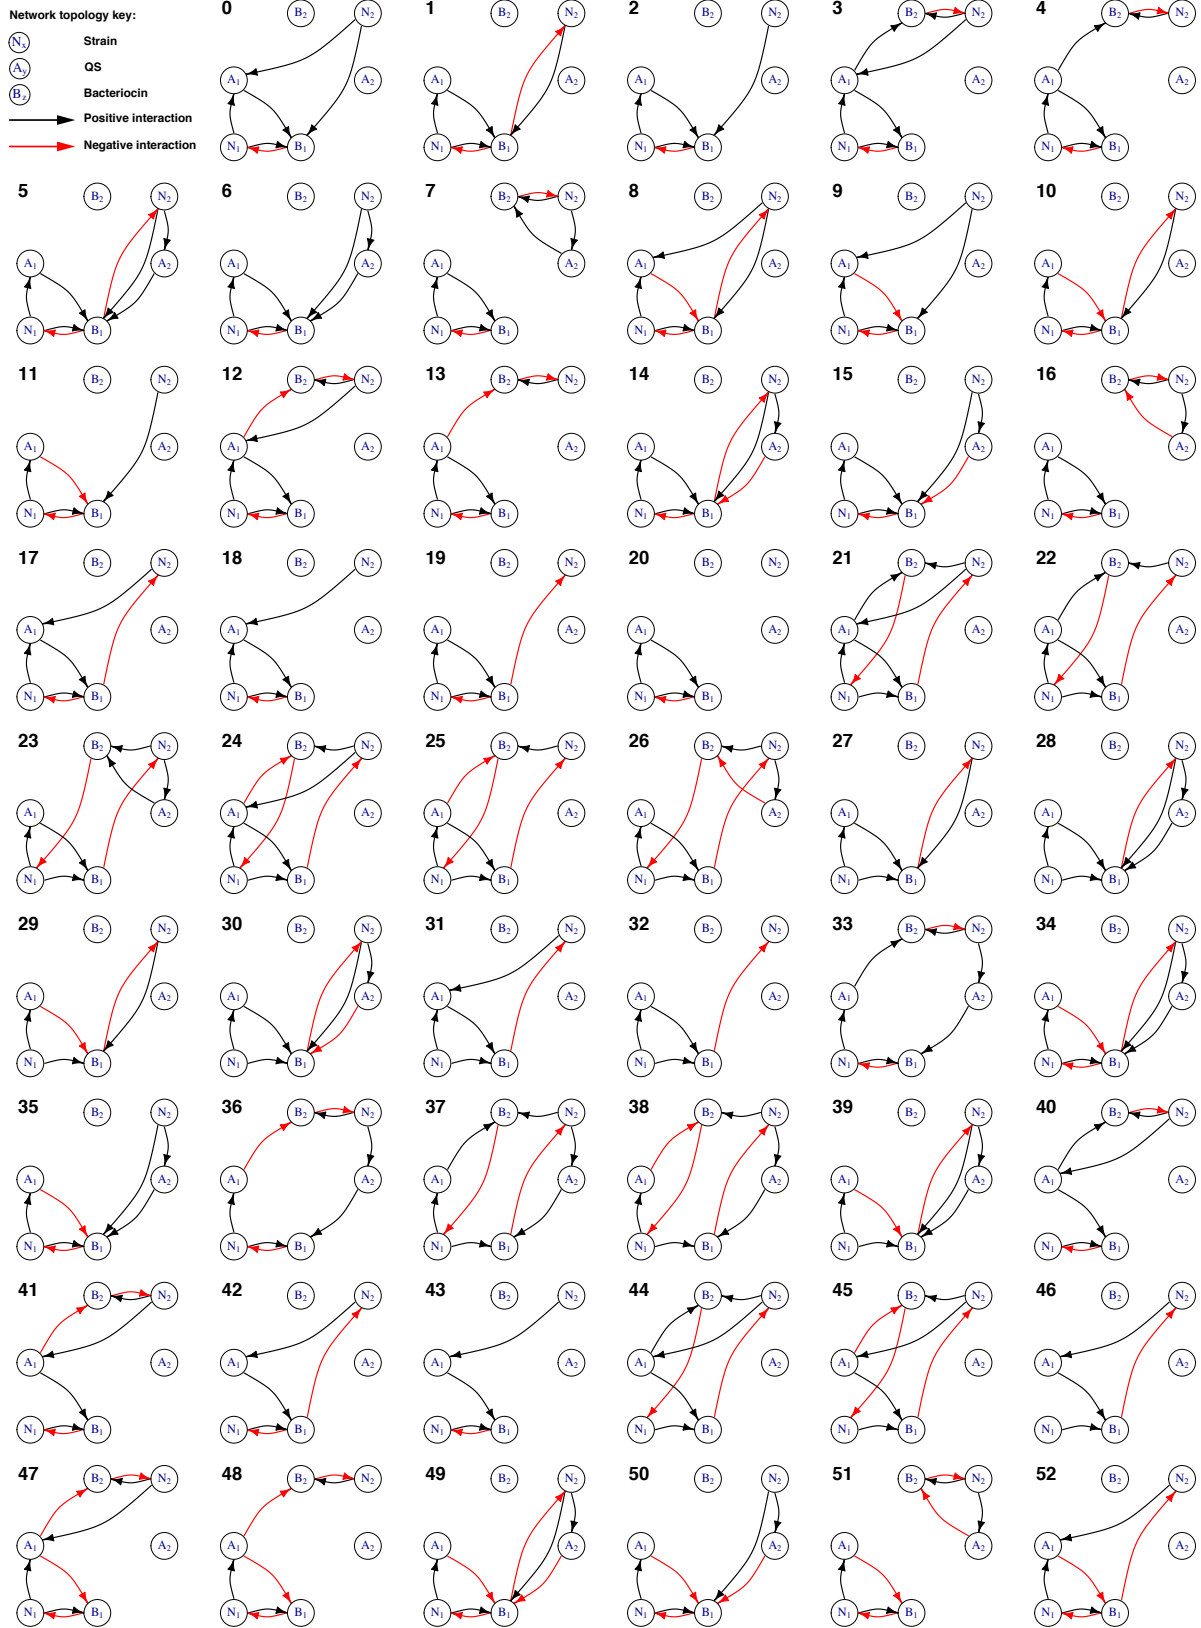

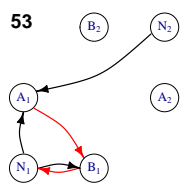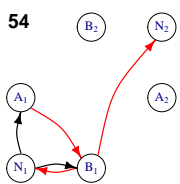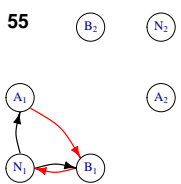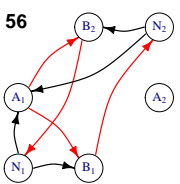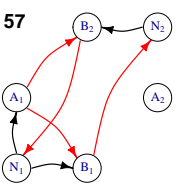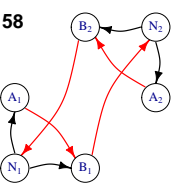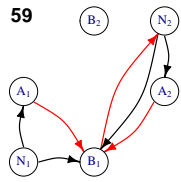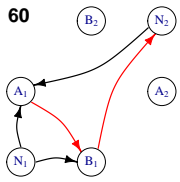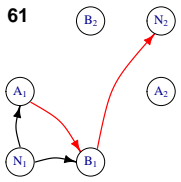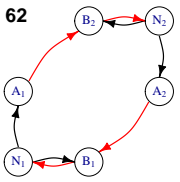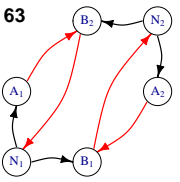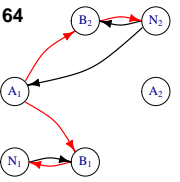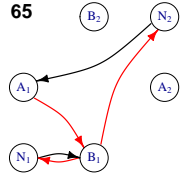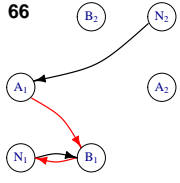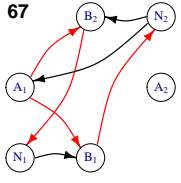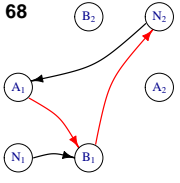

Supplementary Figure 5: Three strain model space topologies

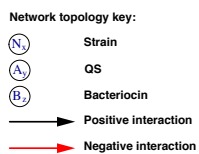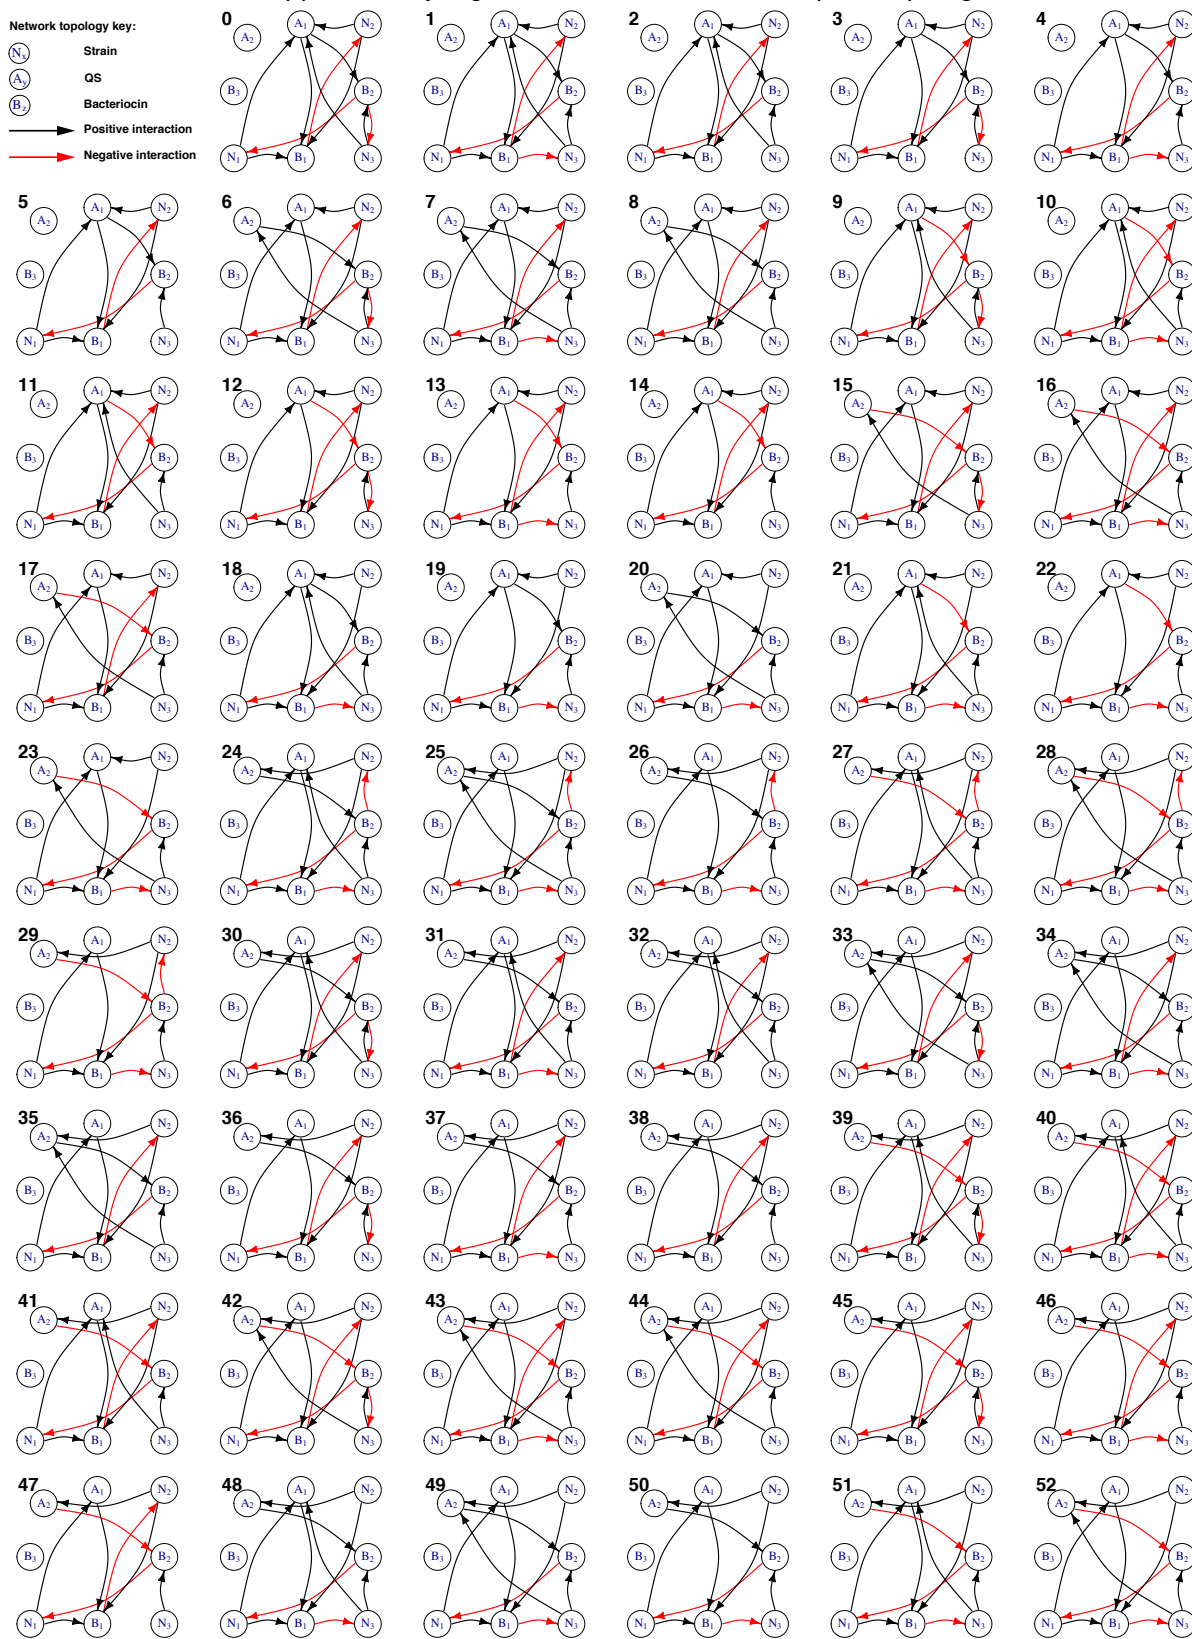

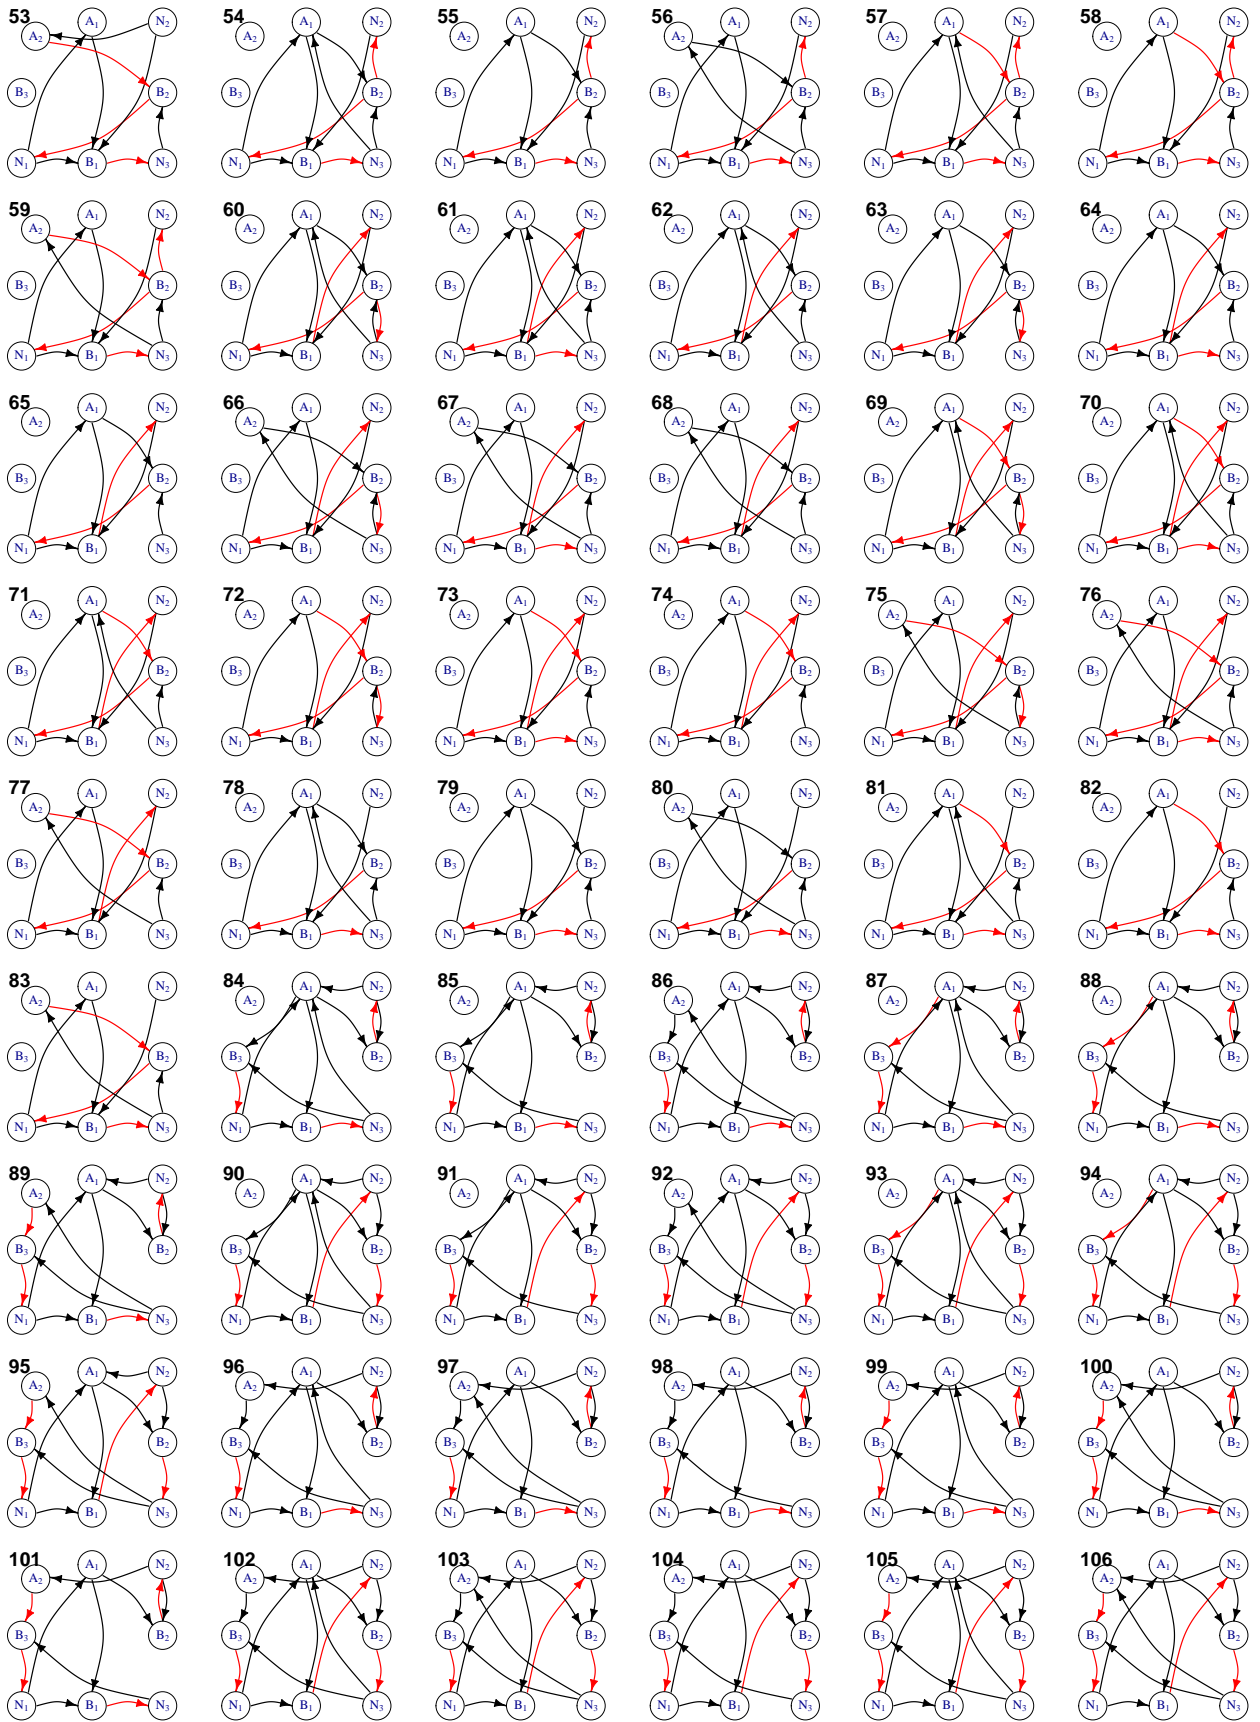



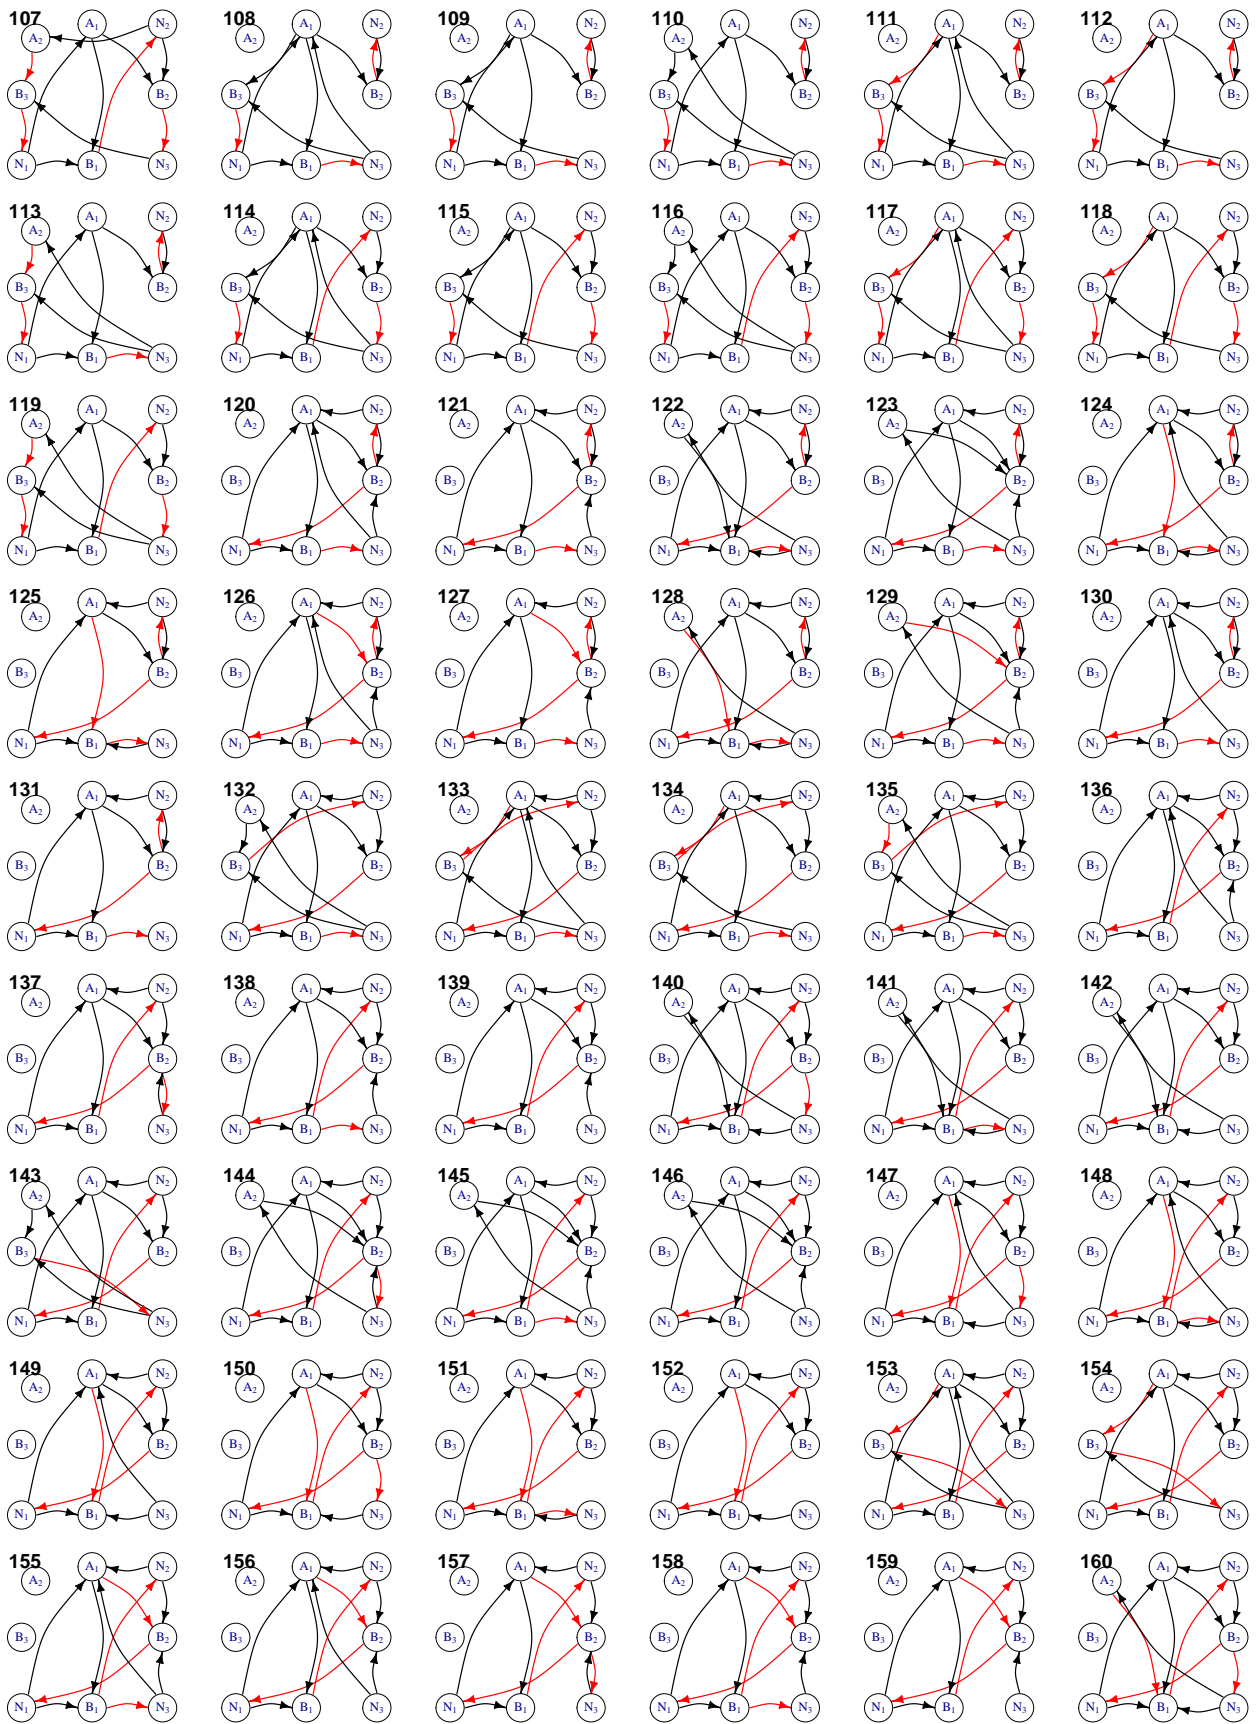

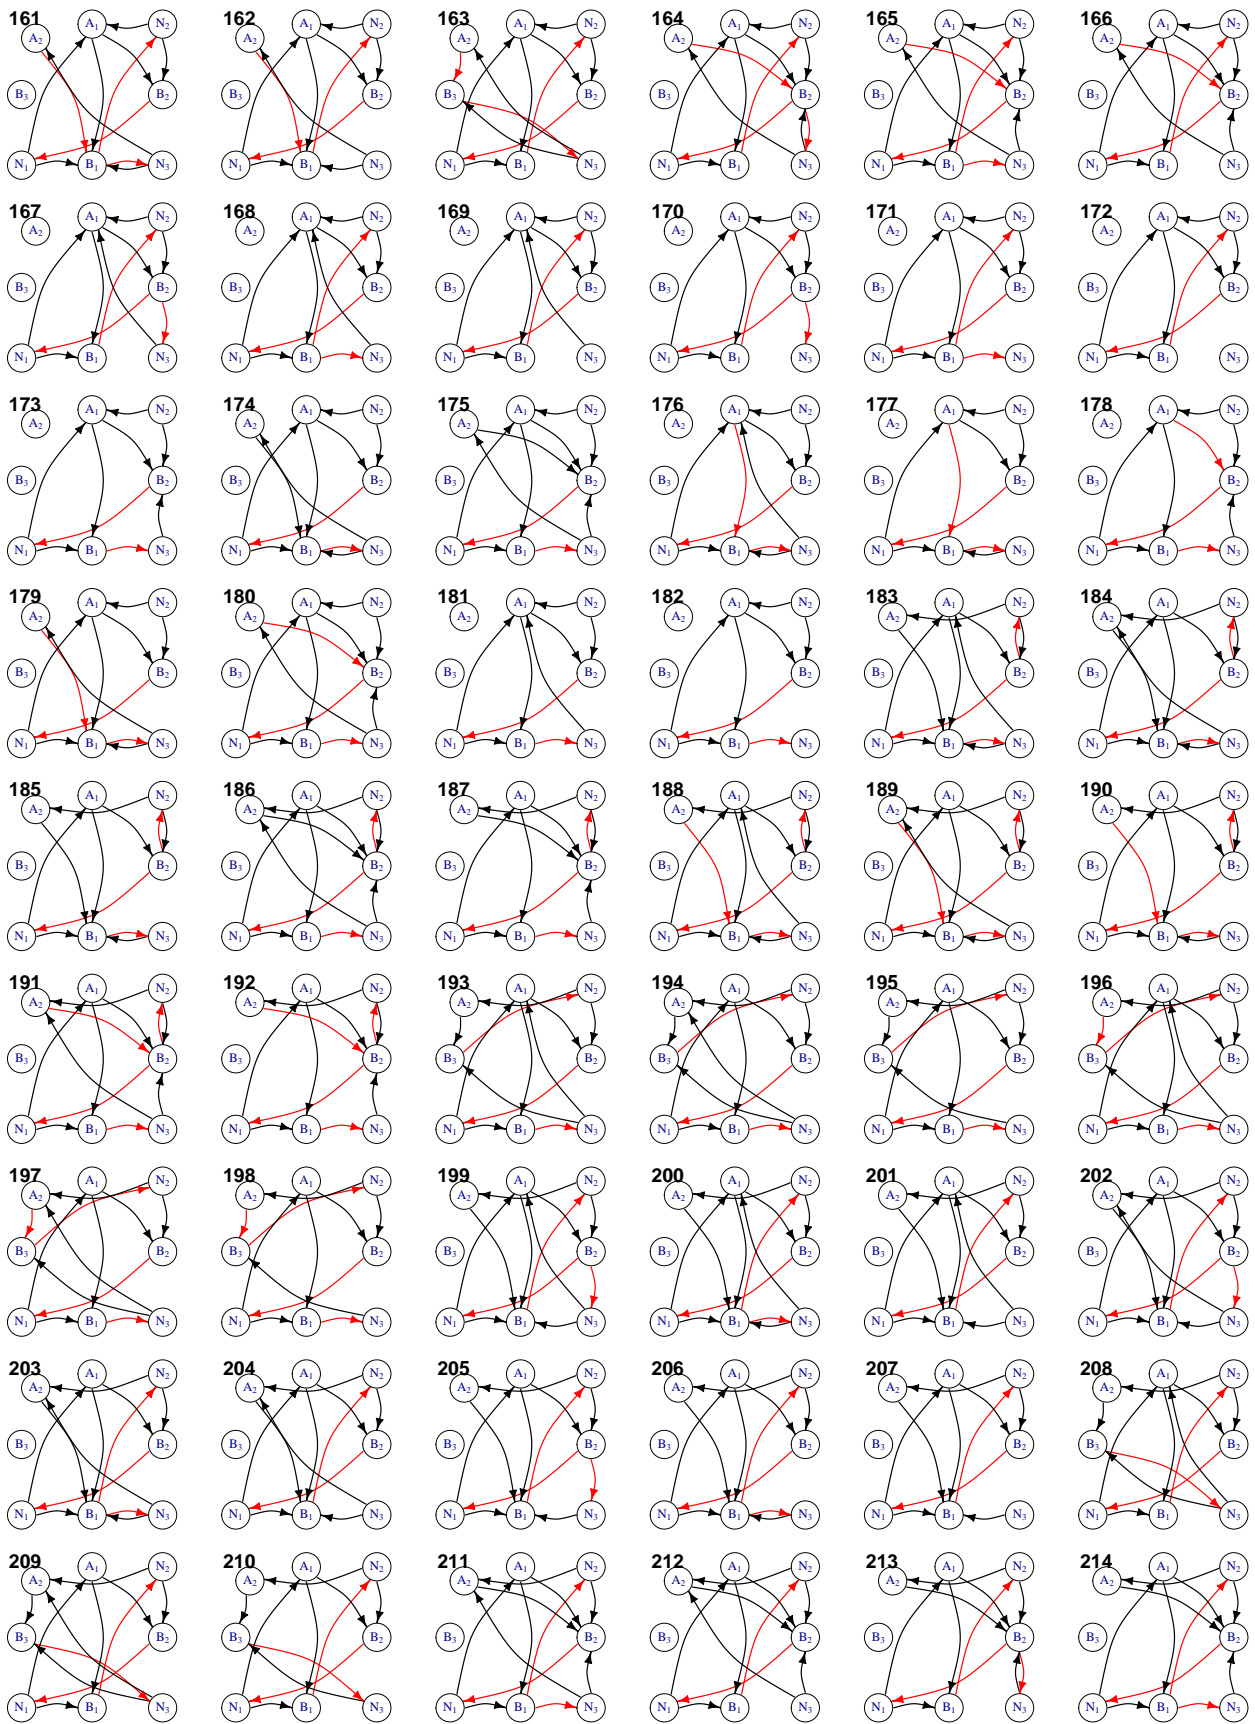

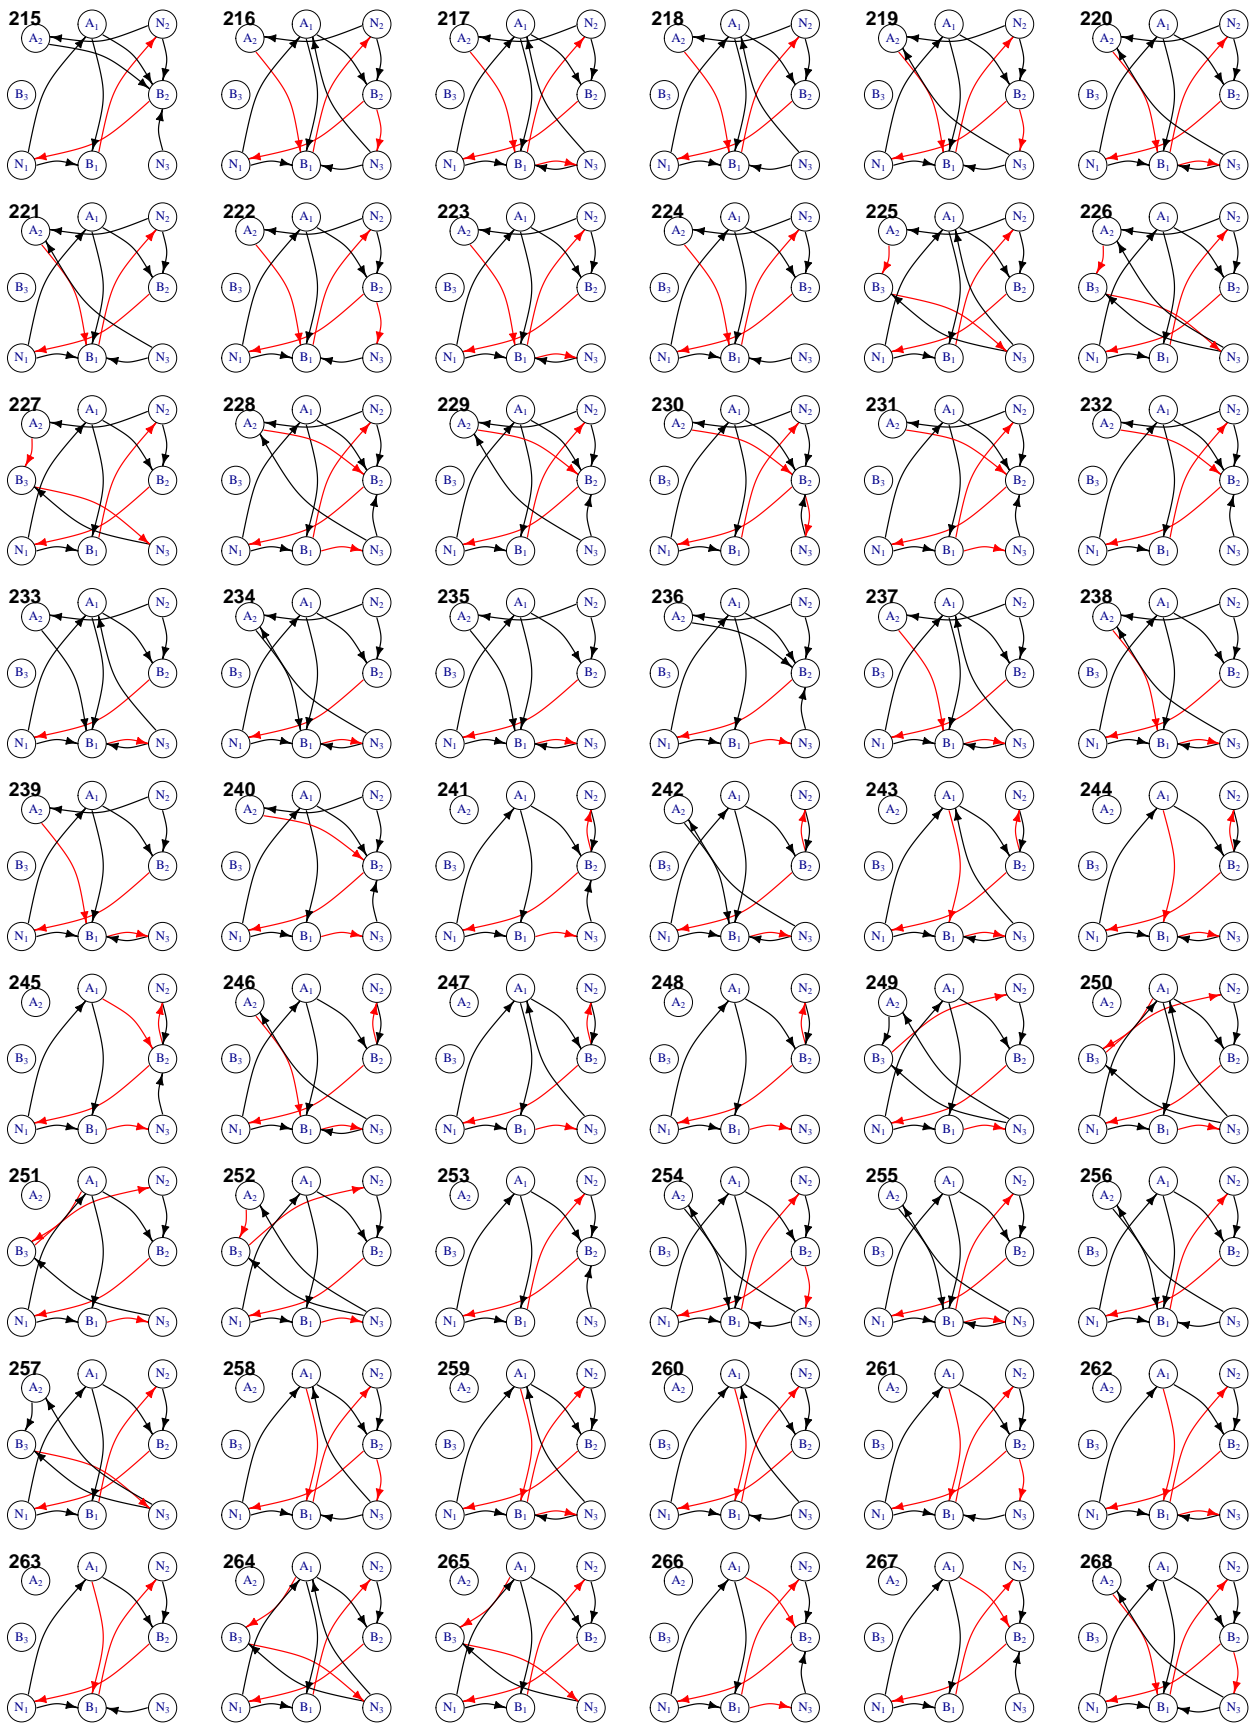

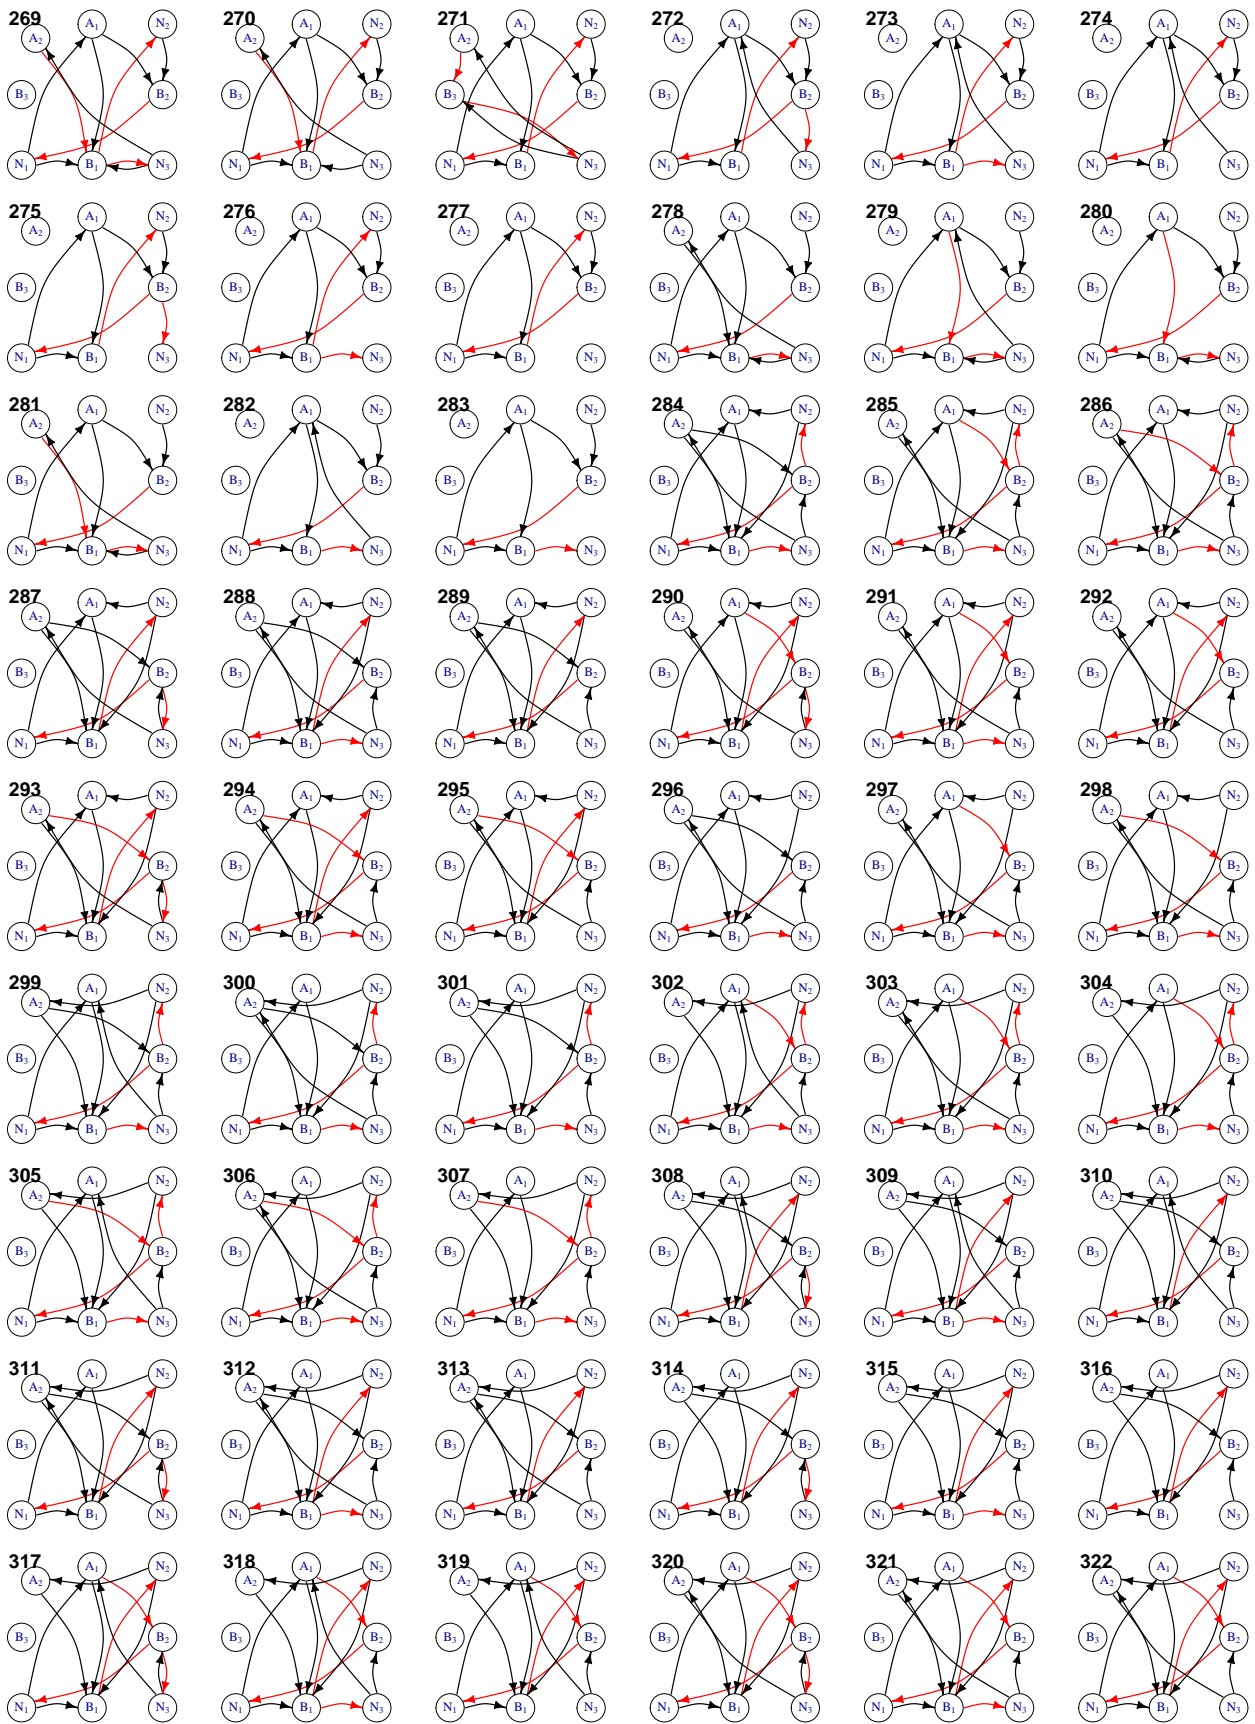

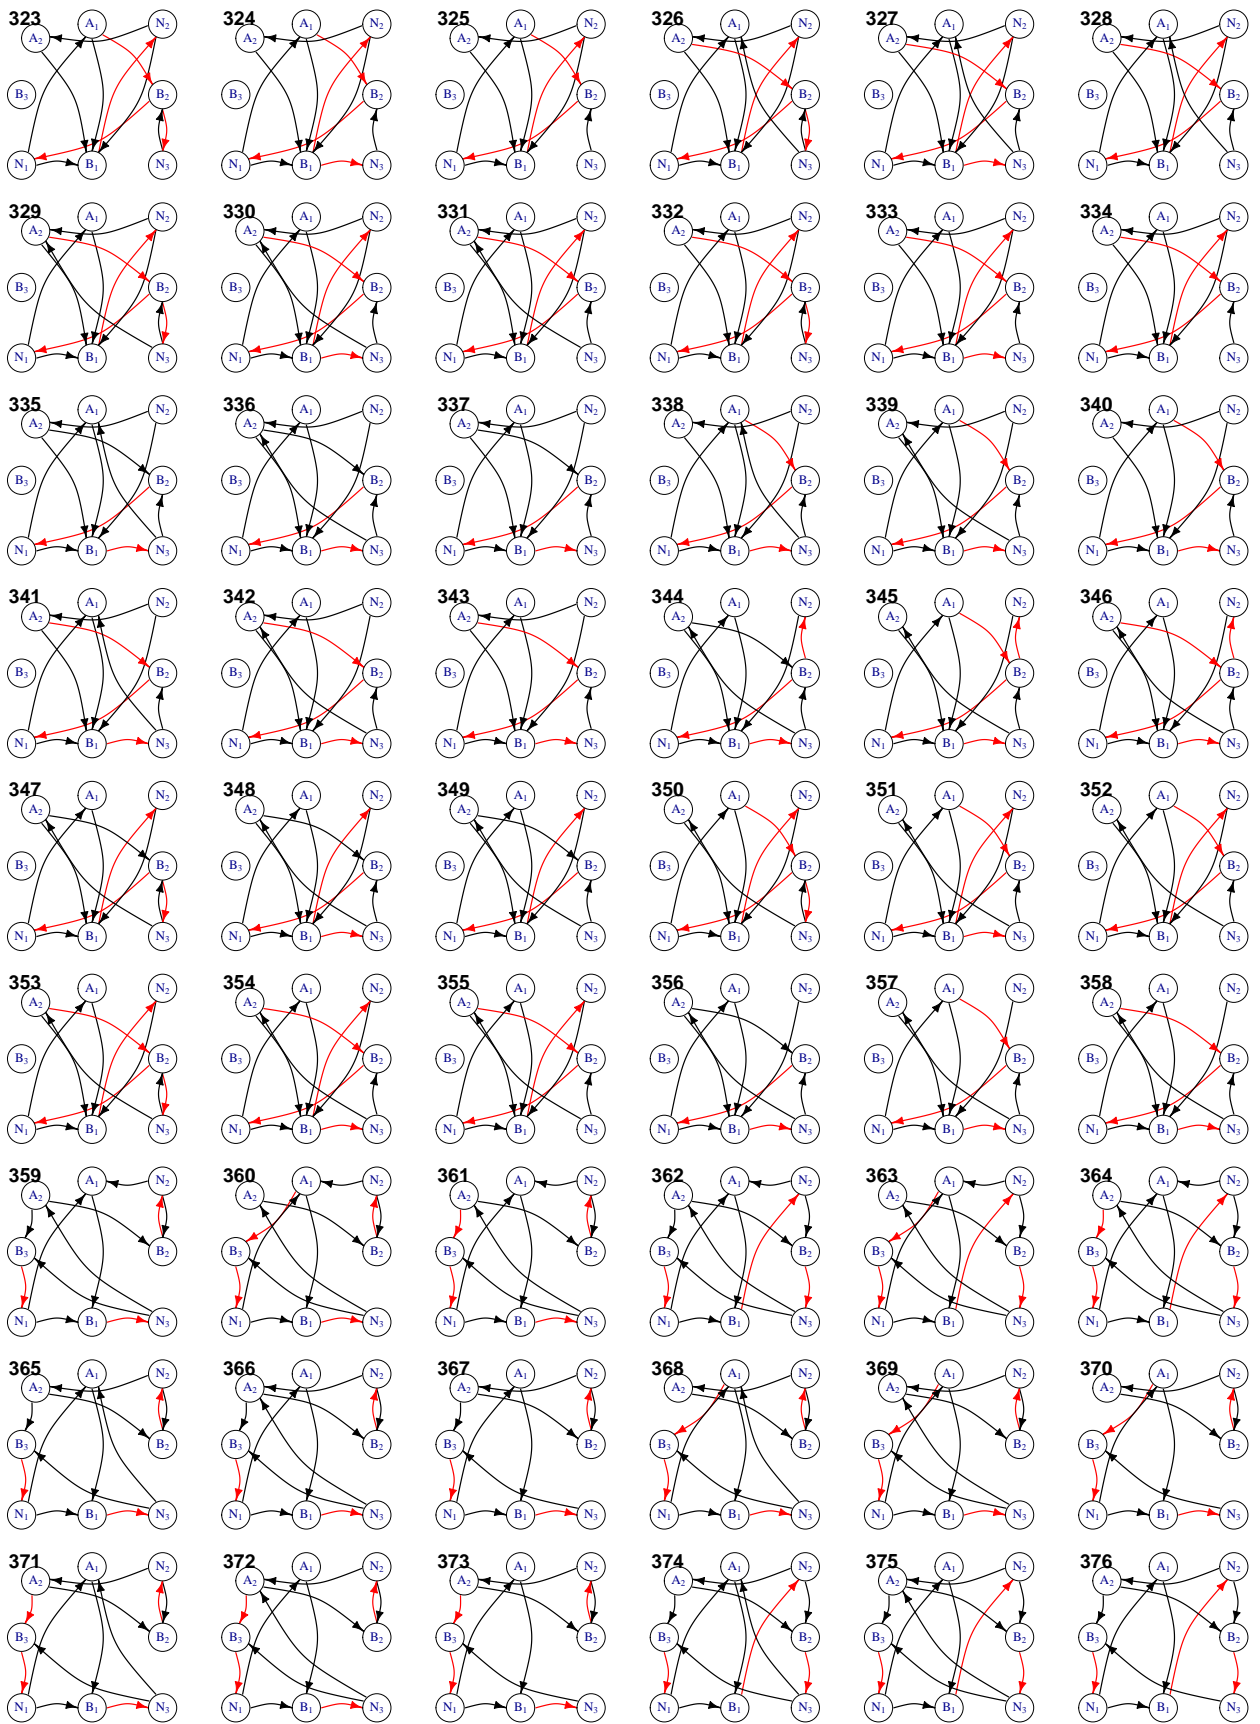

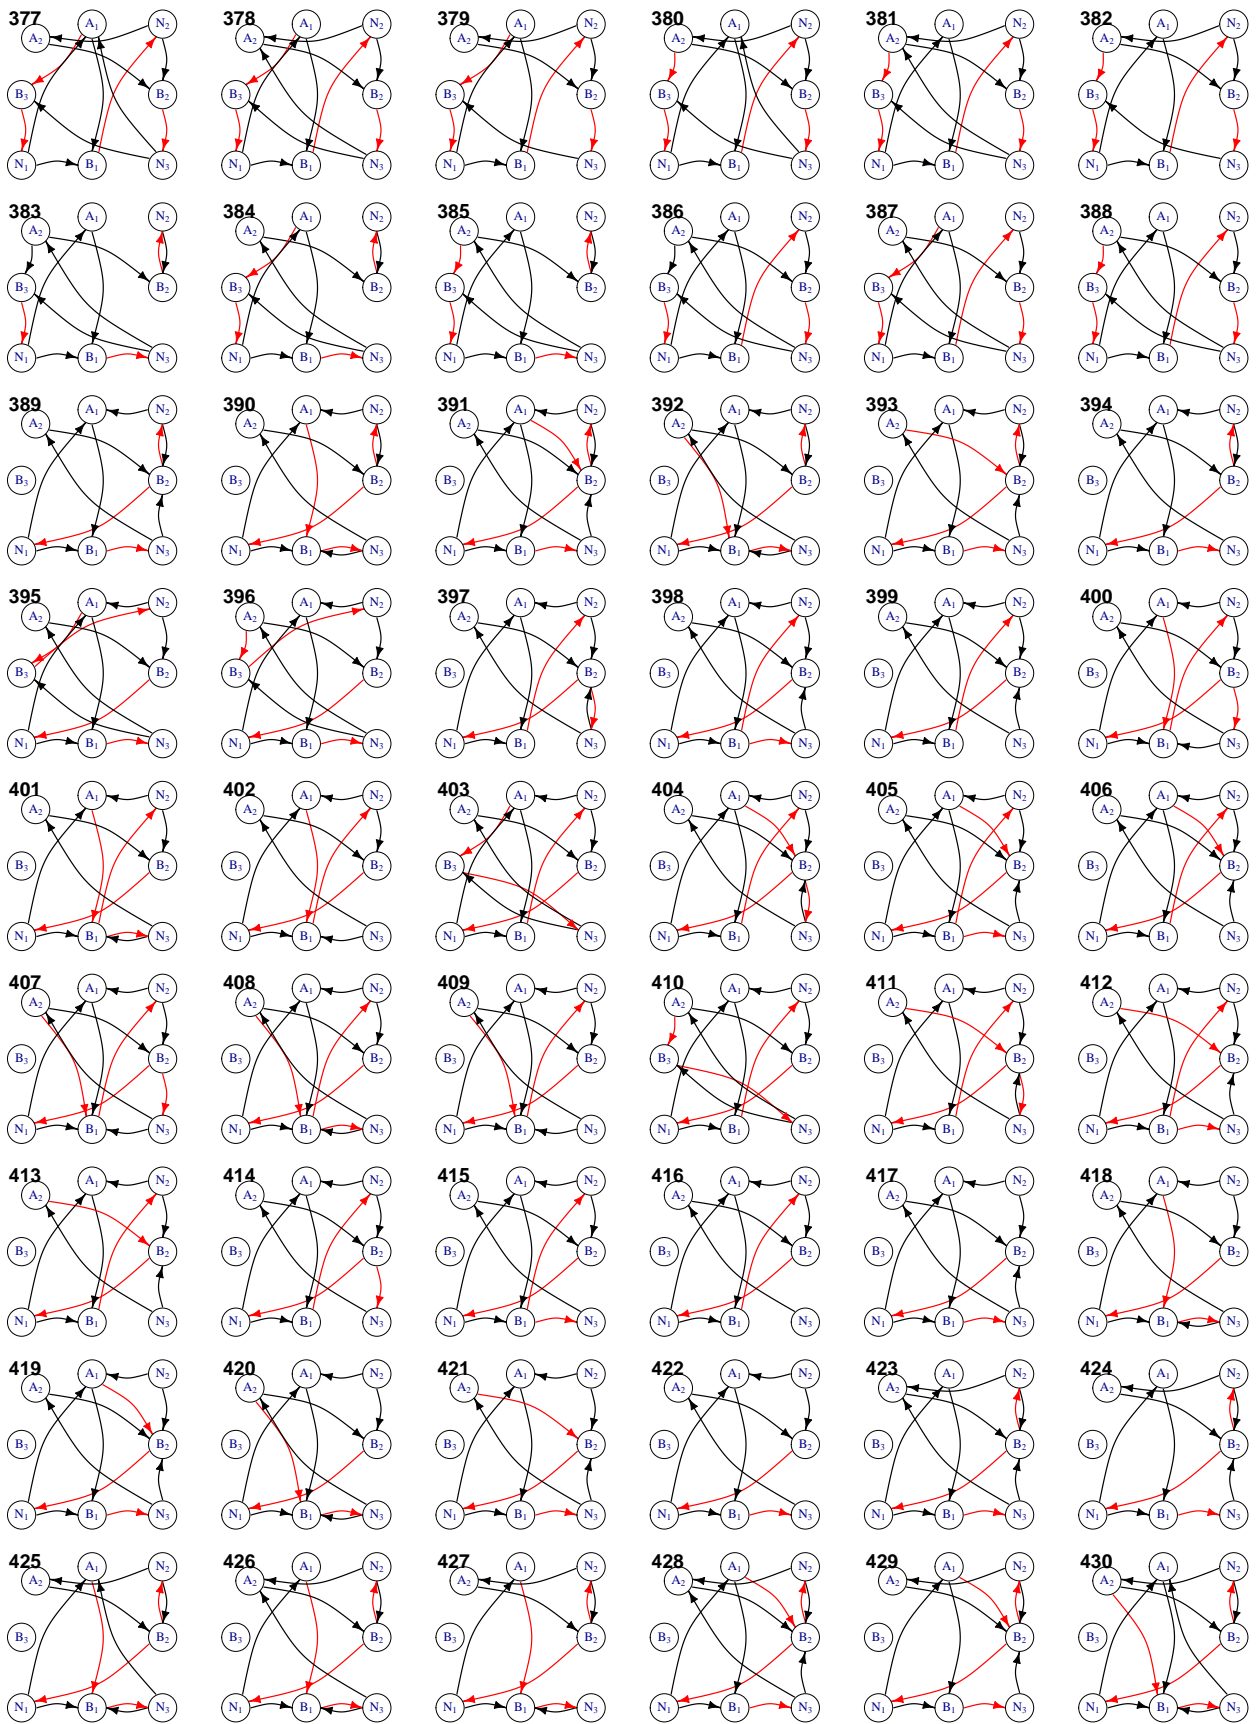

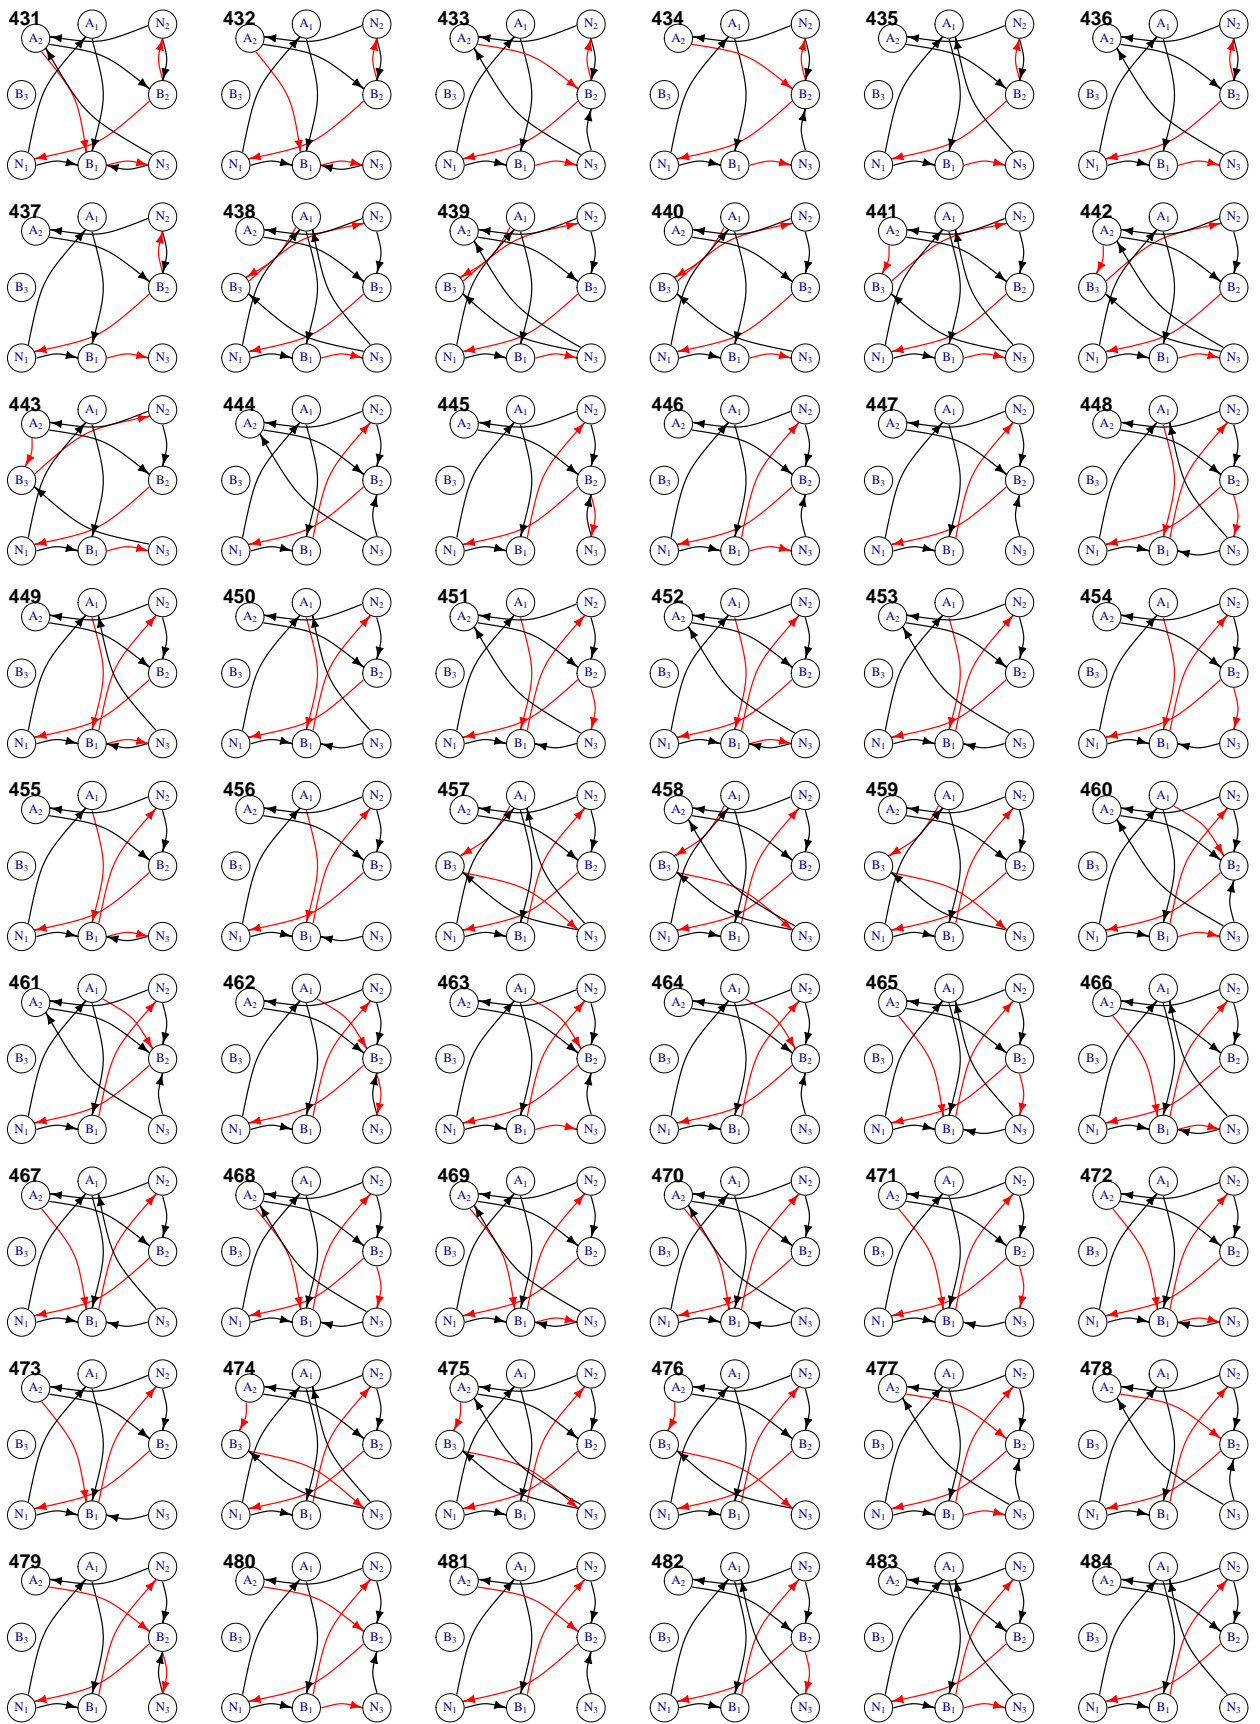

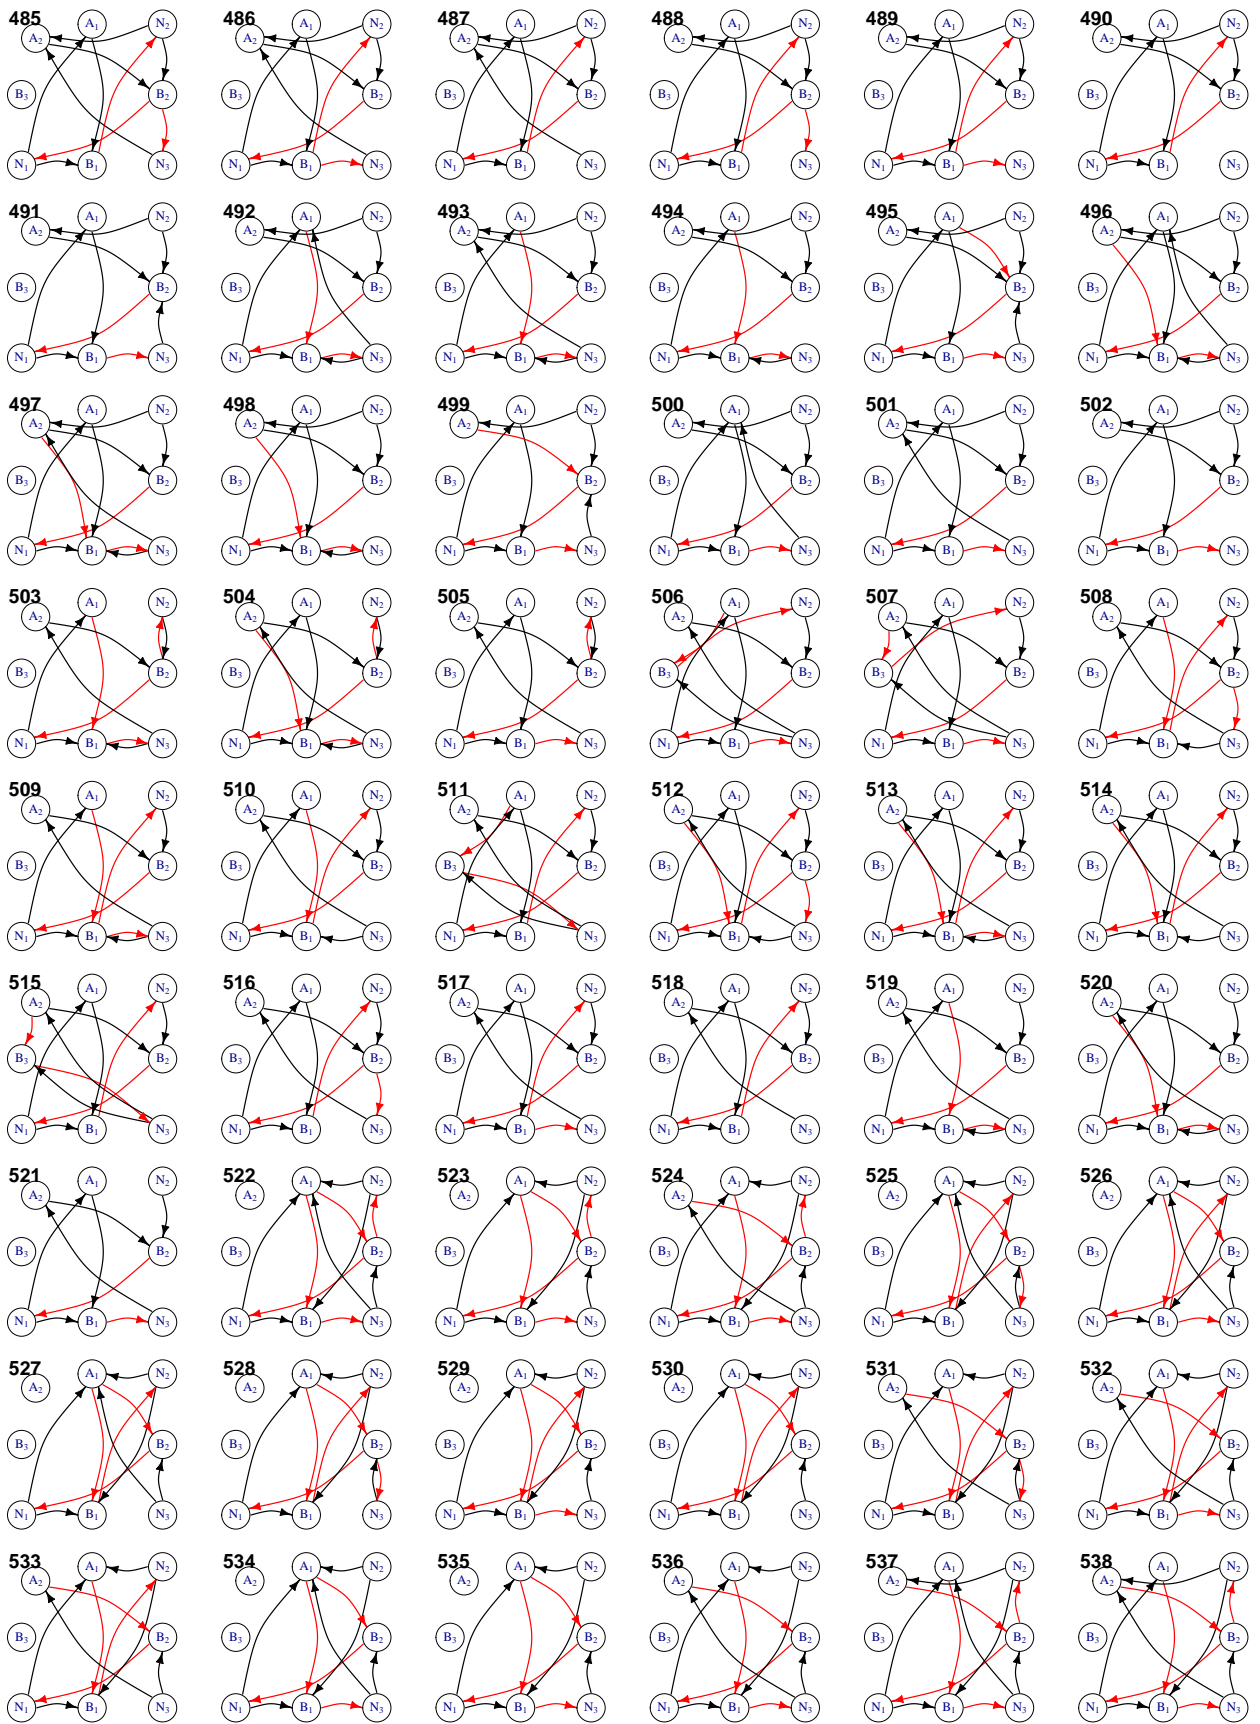



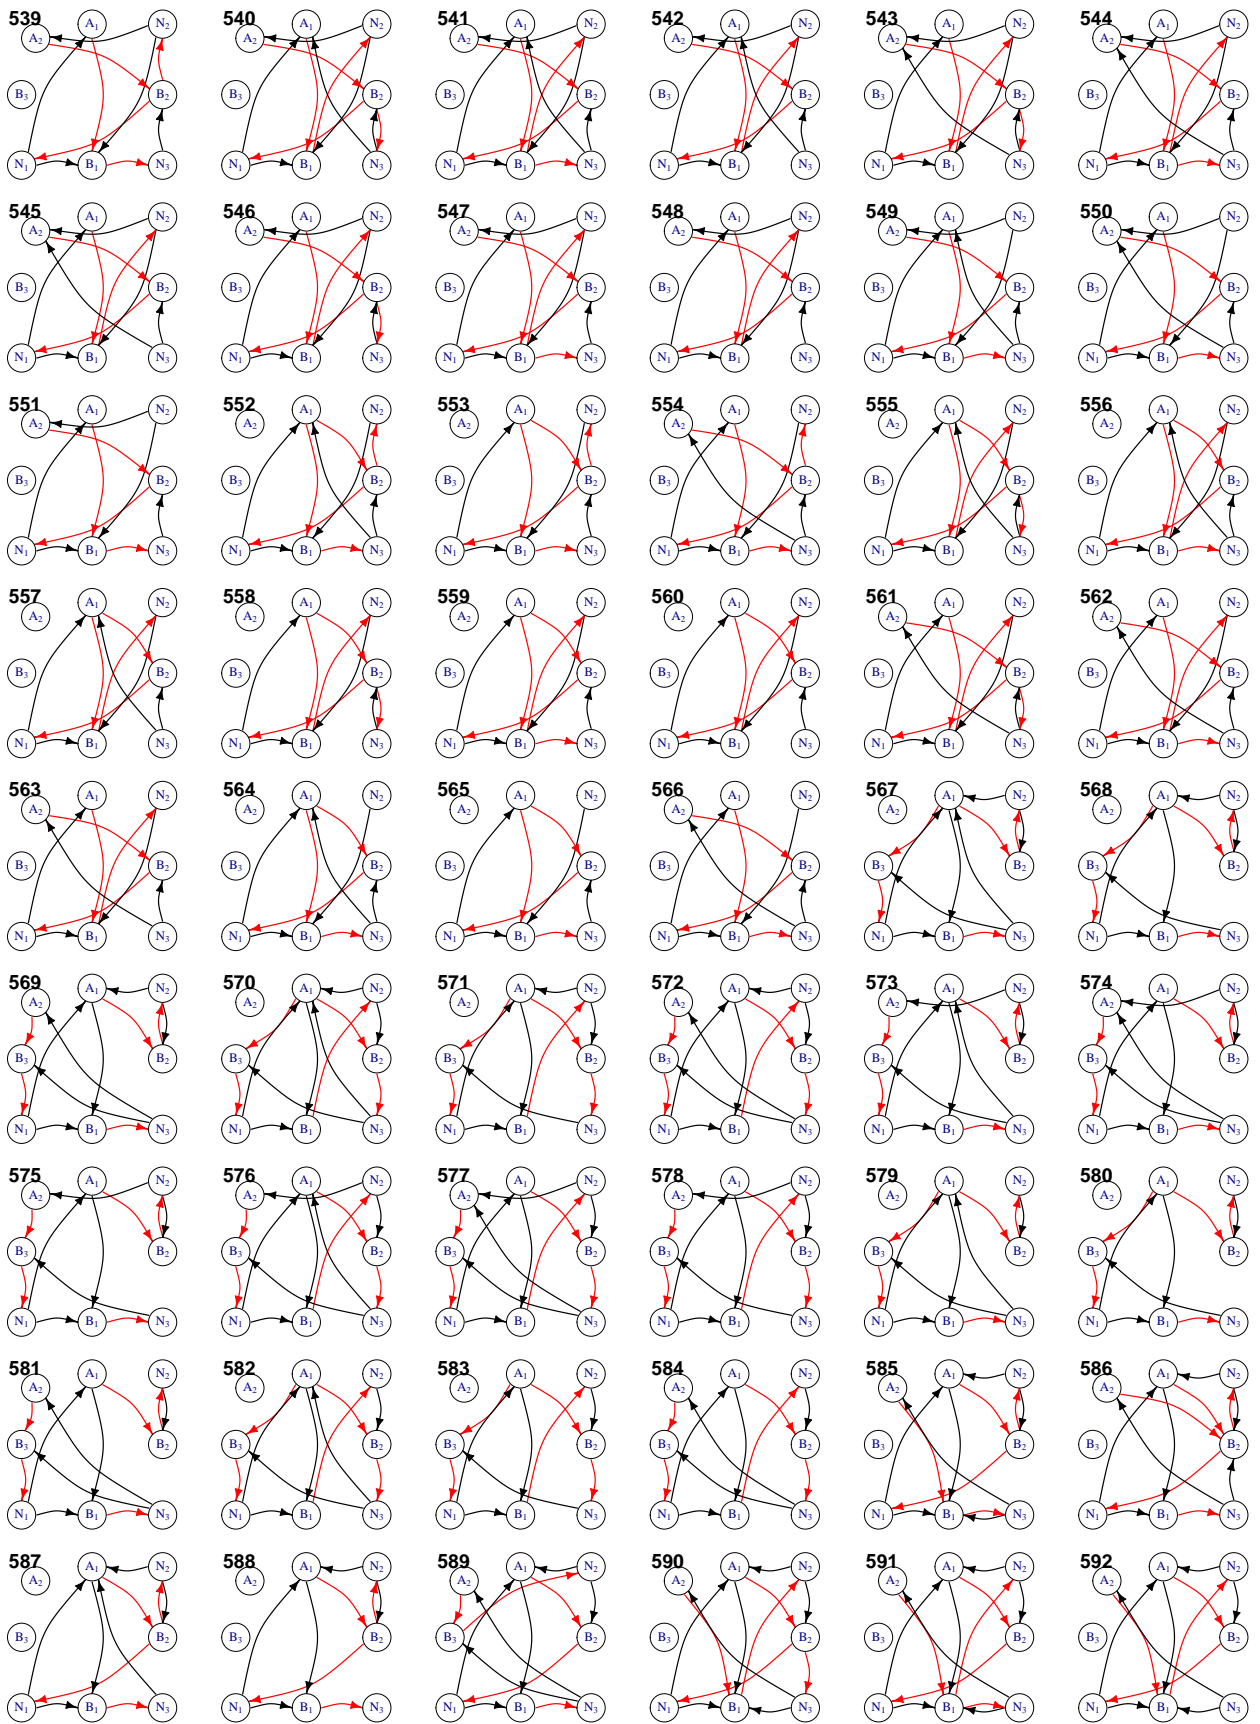

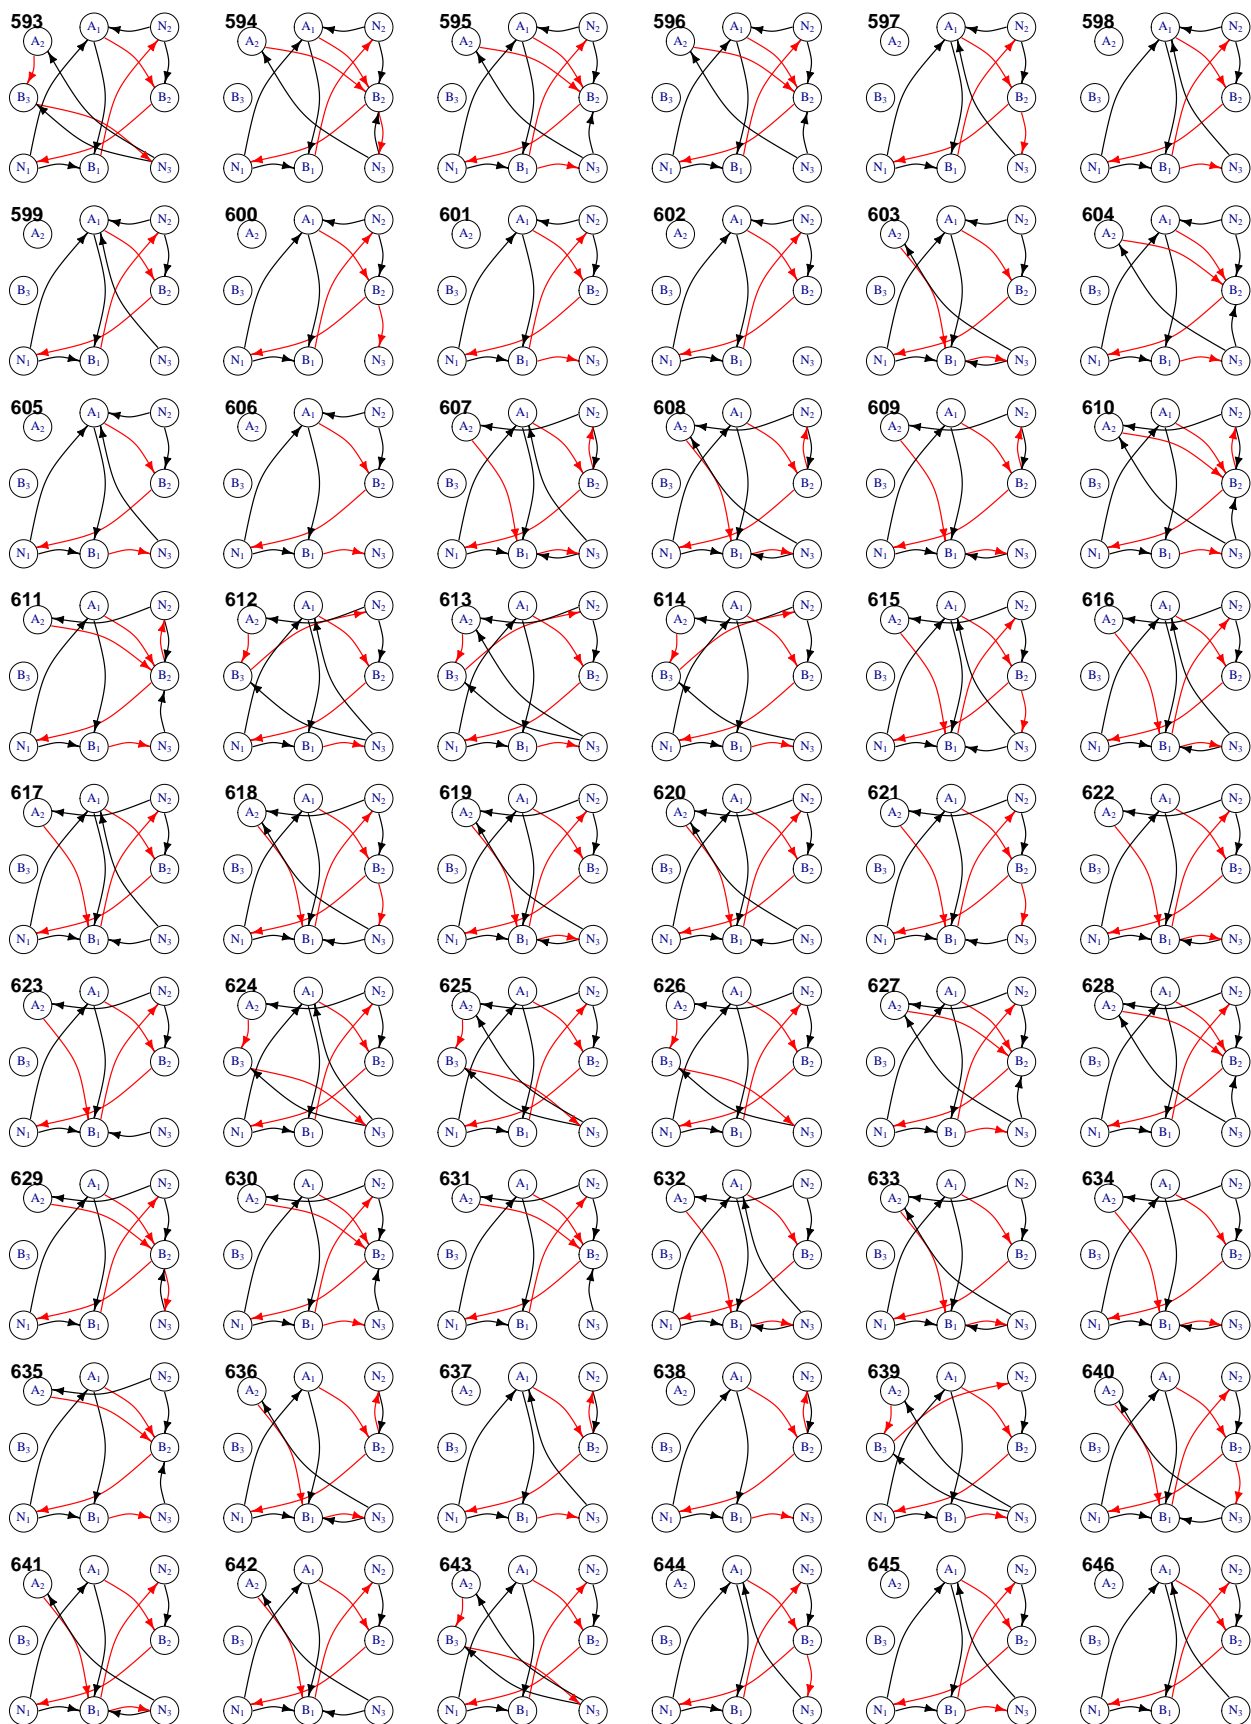

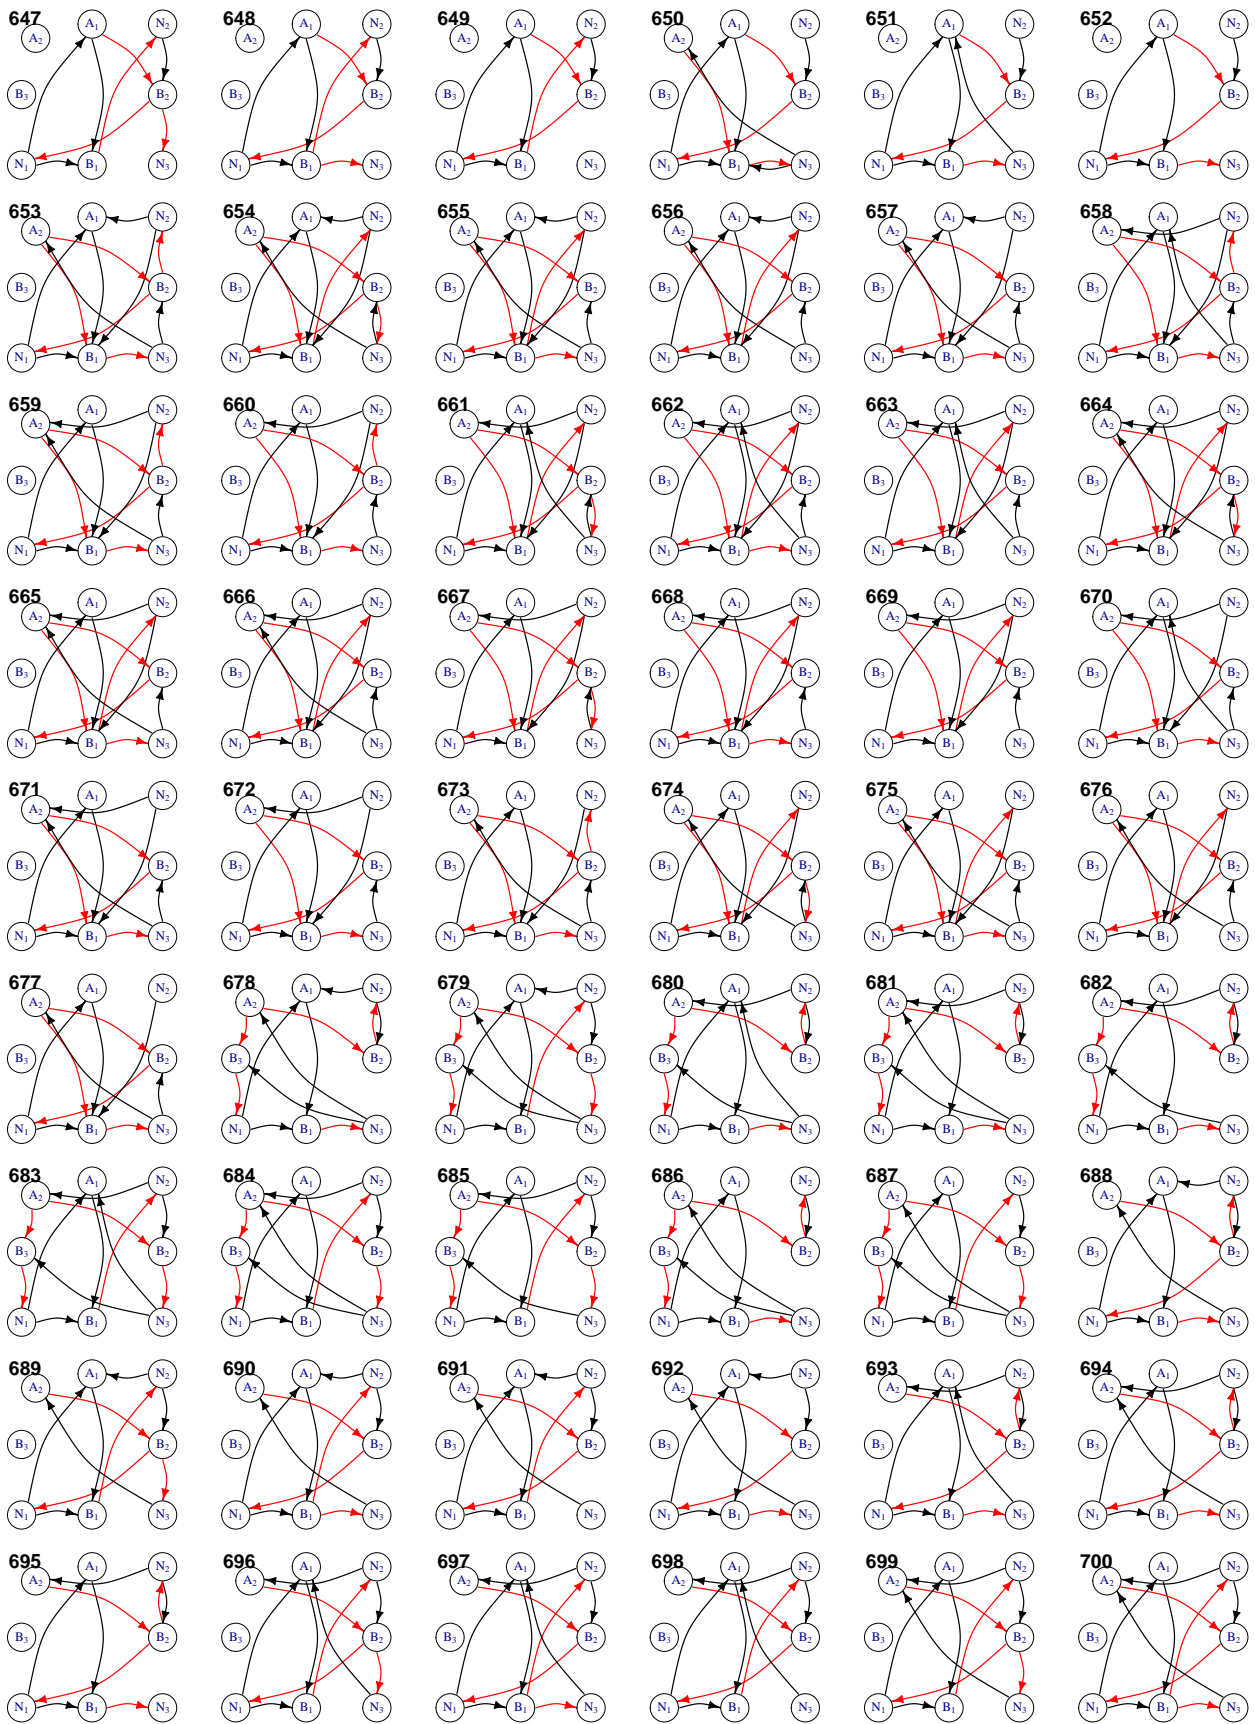

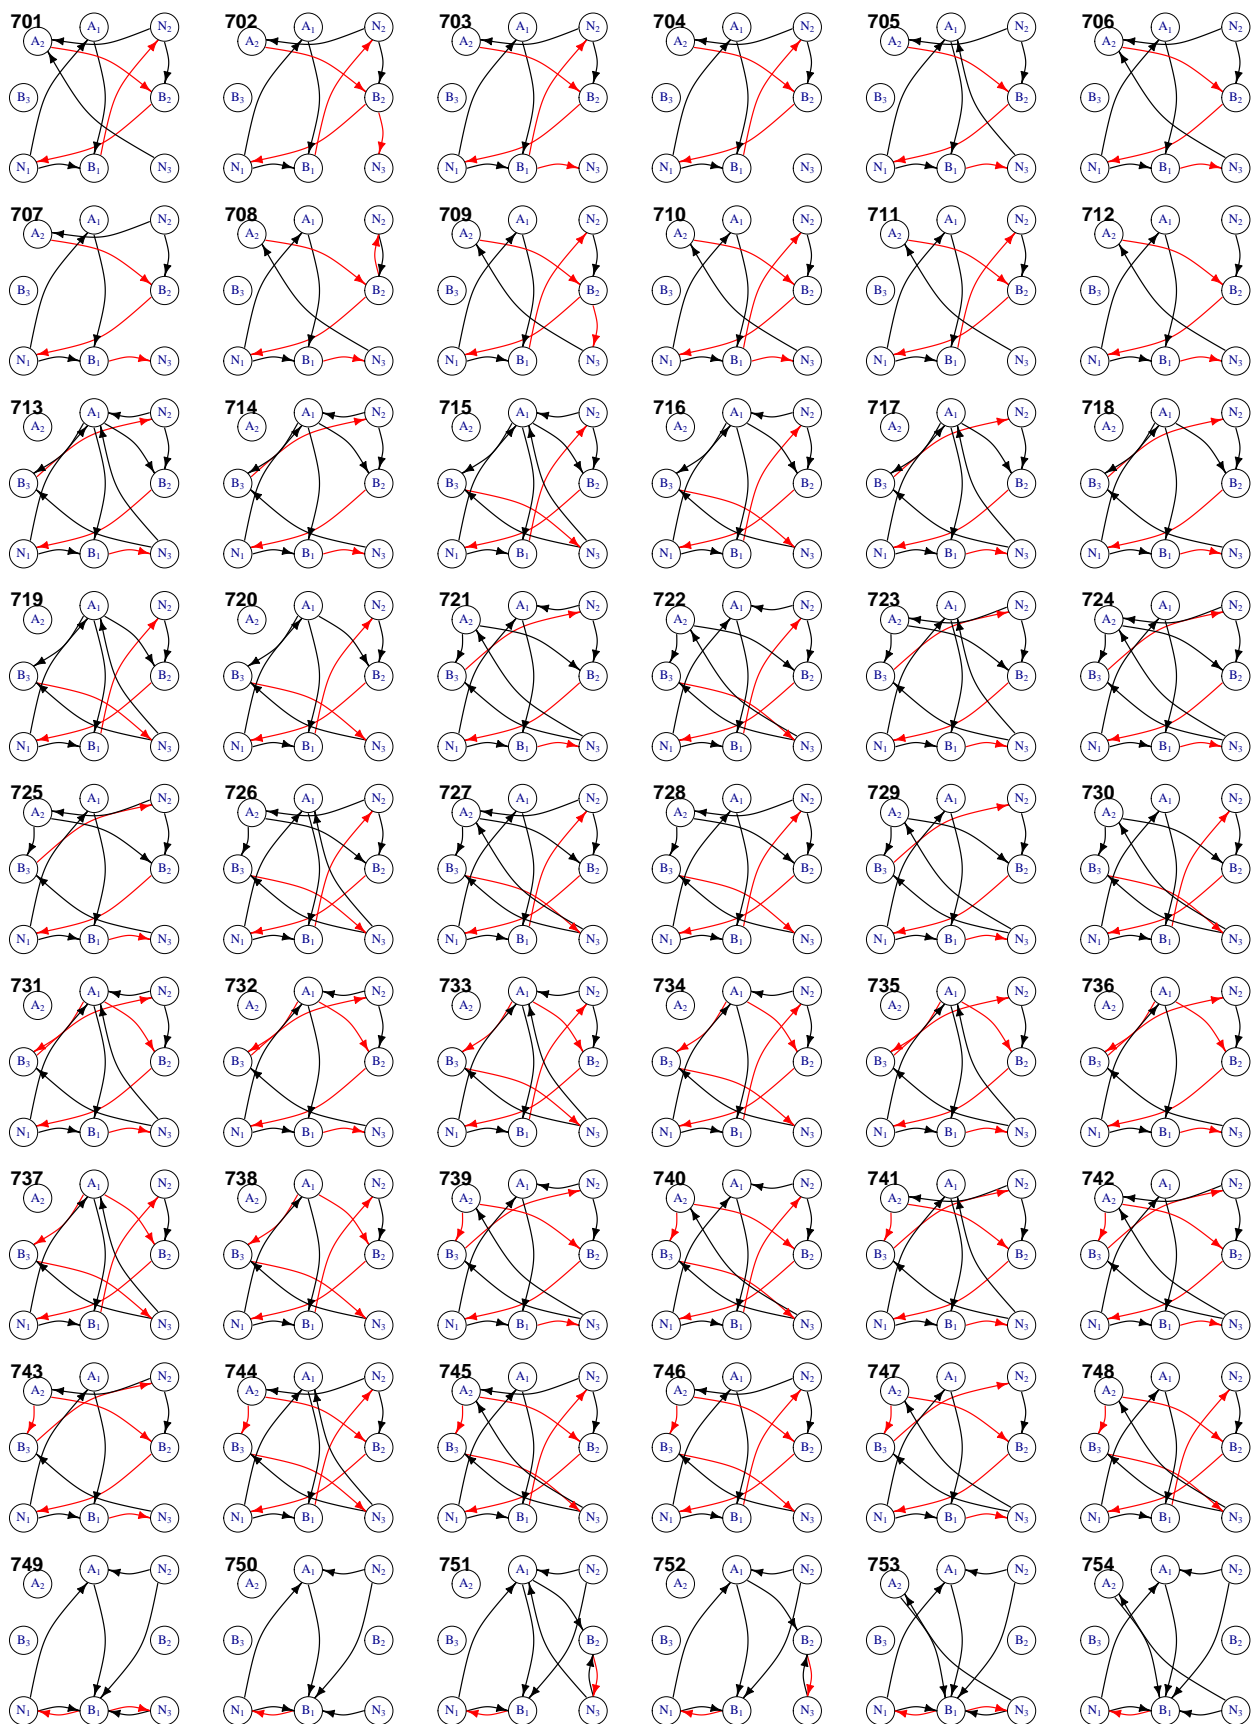

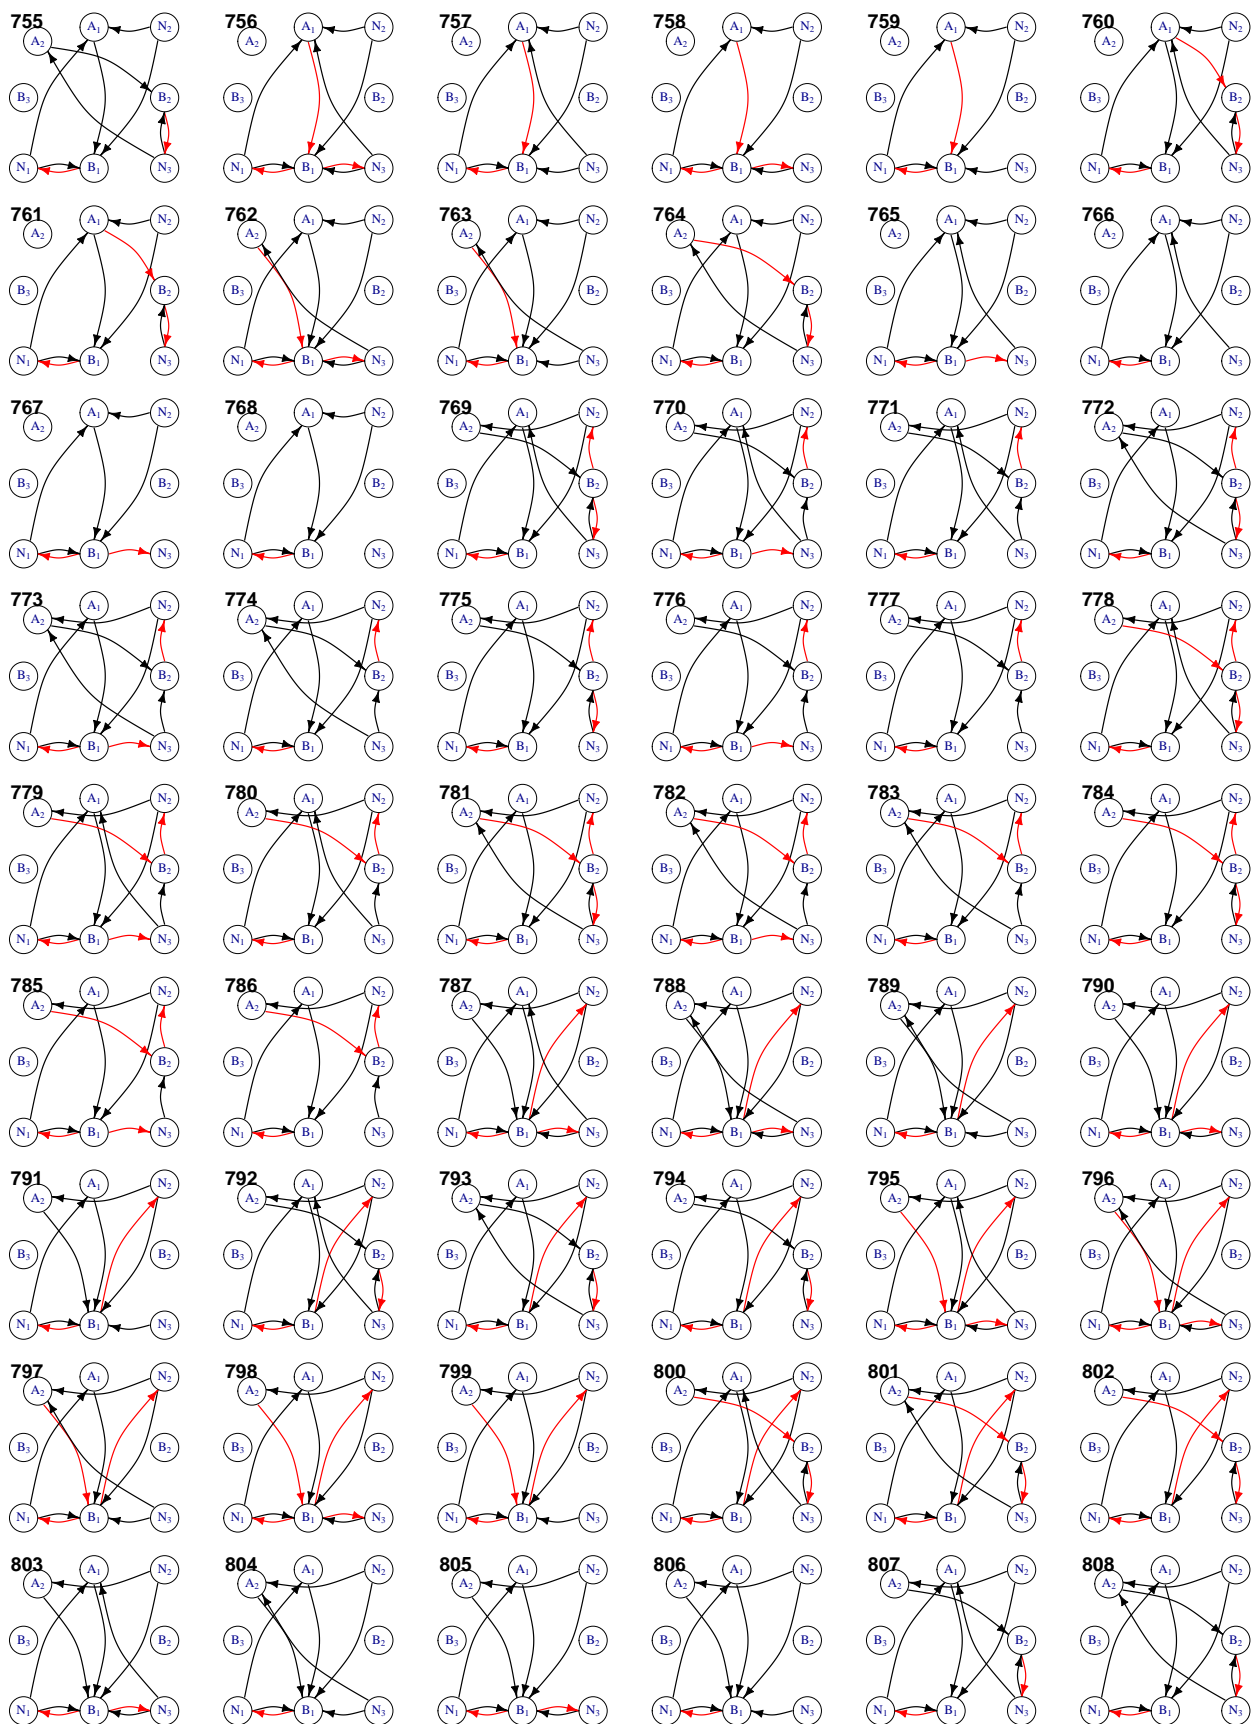

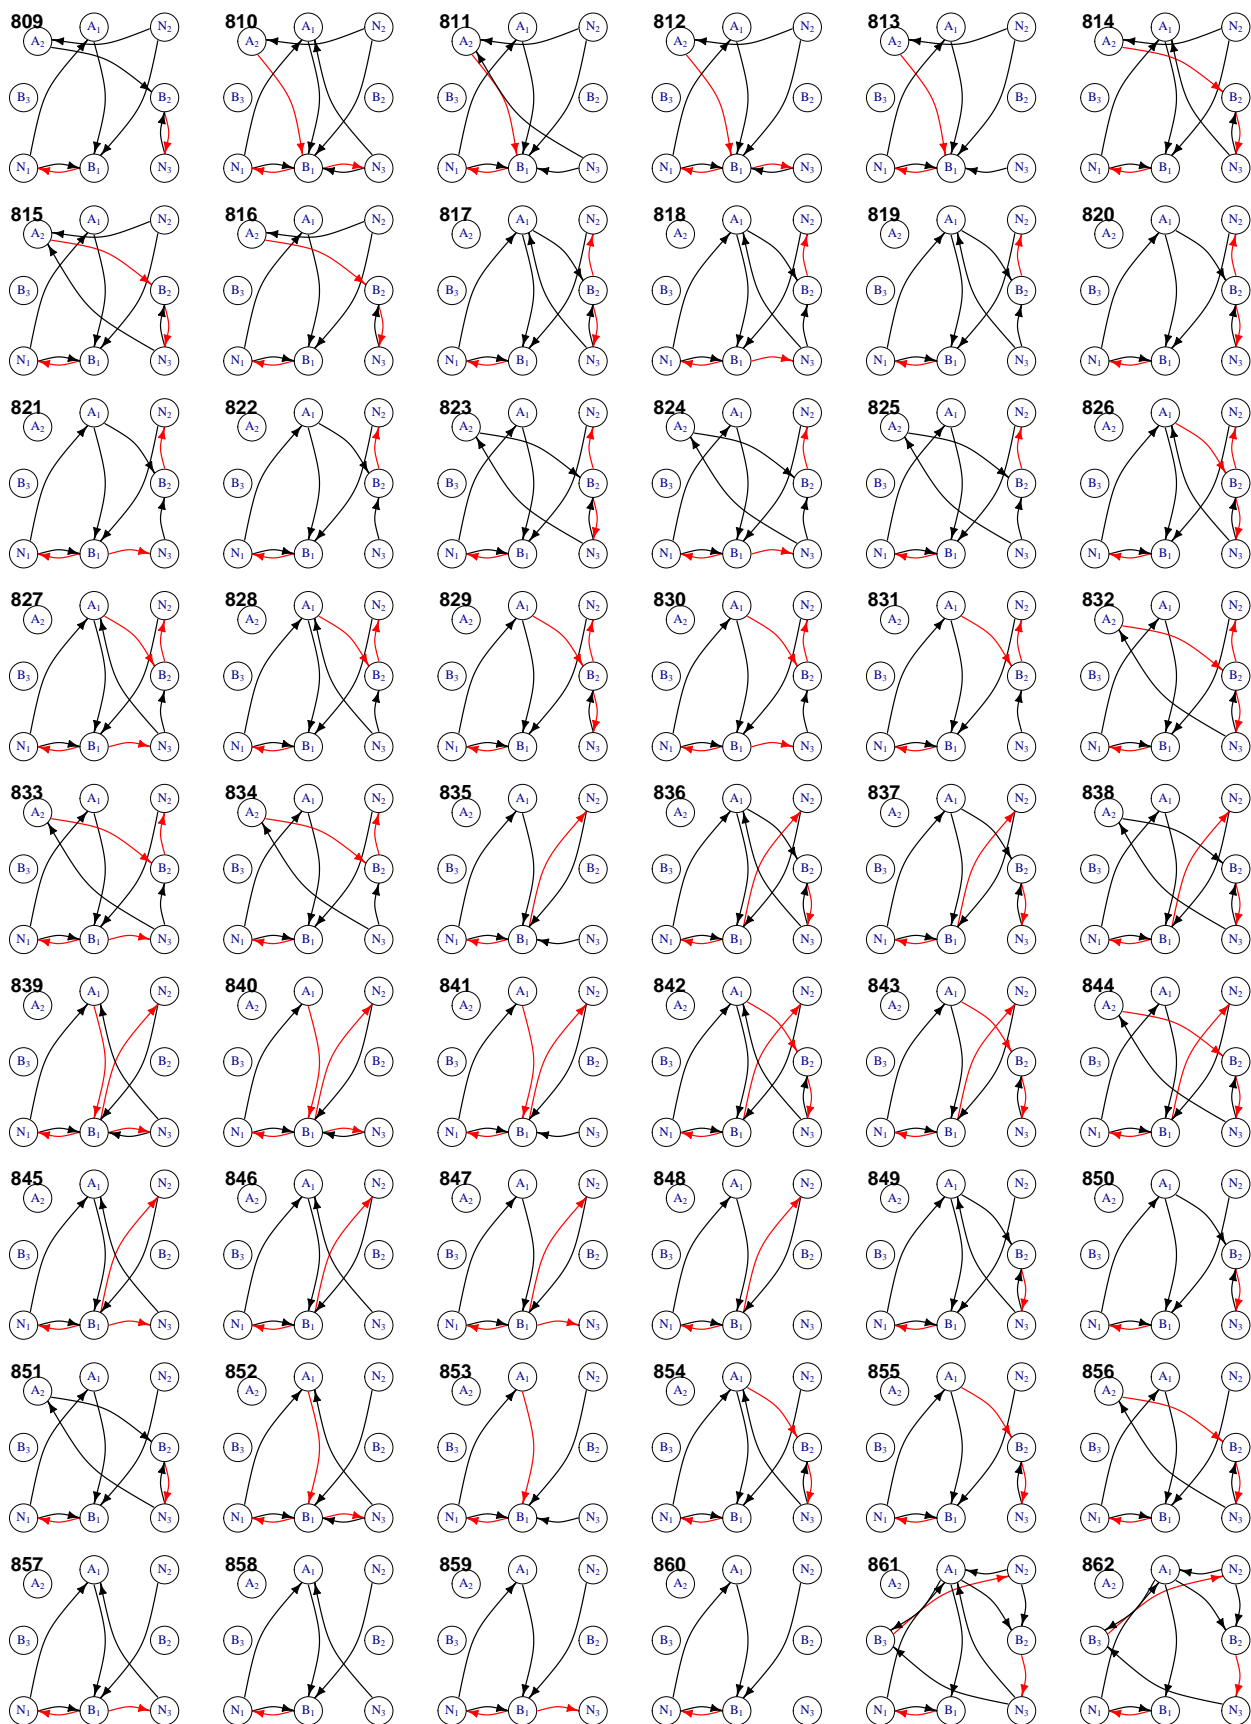

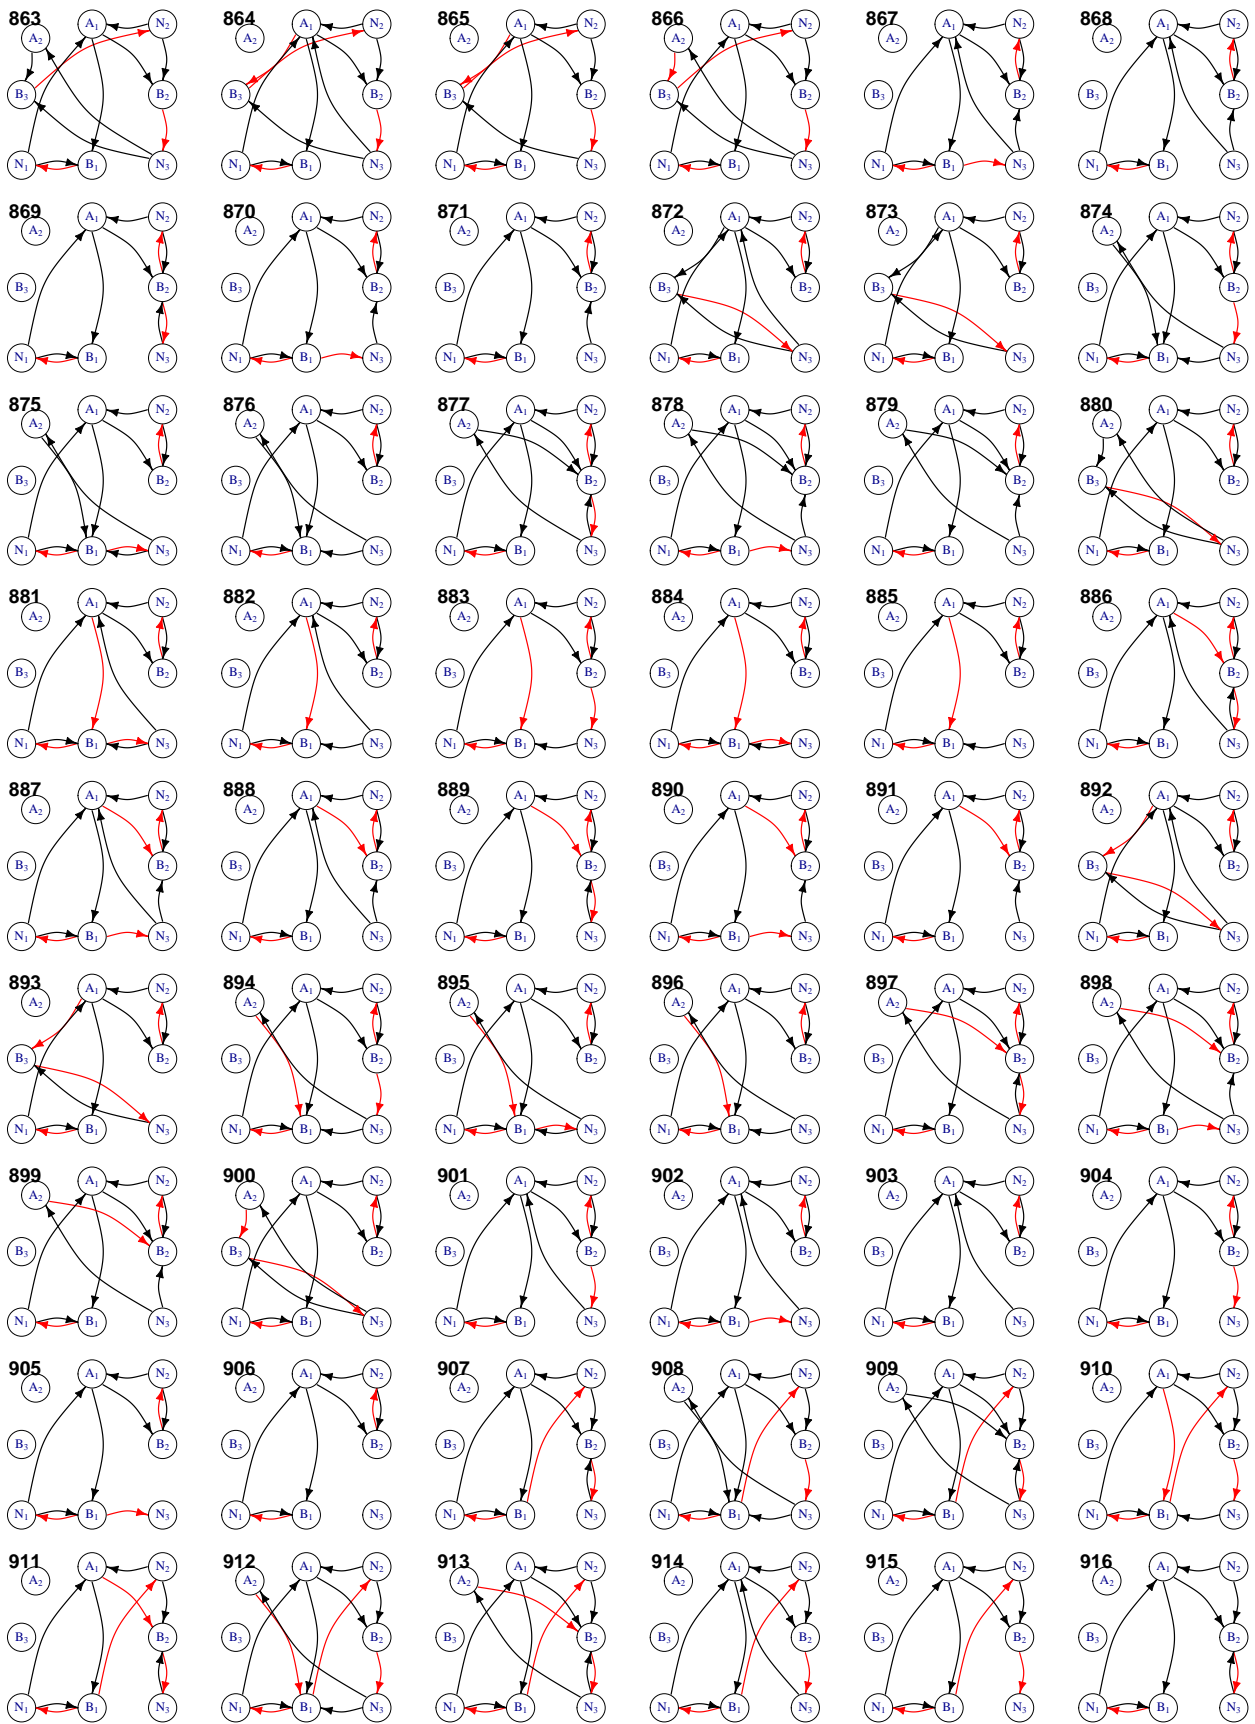

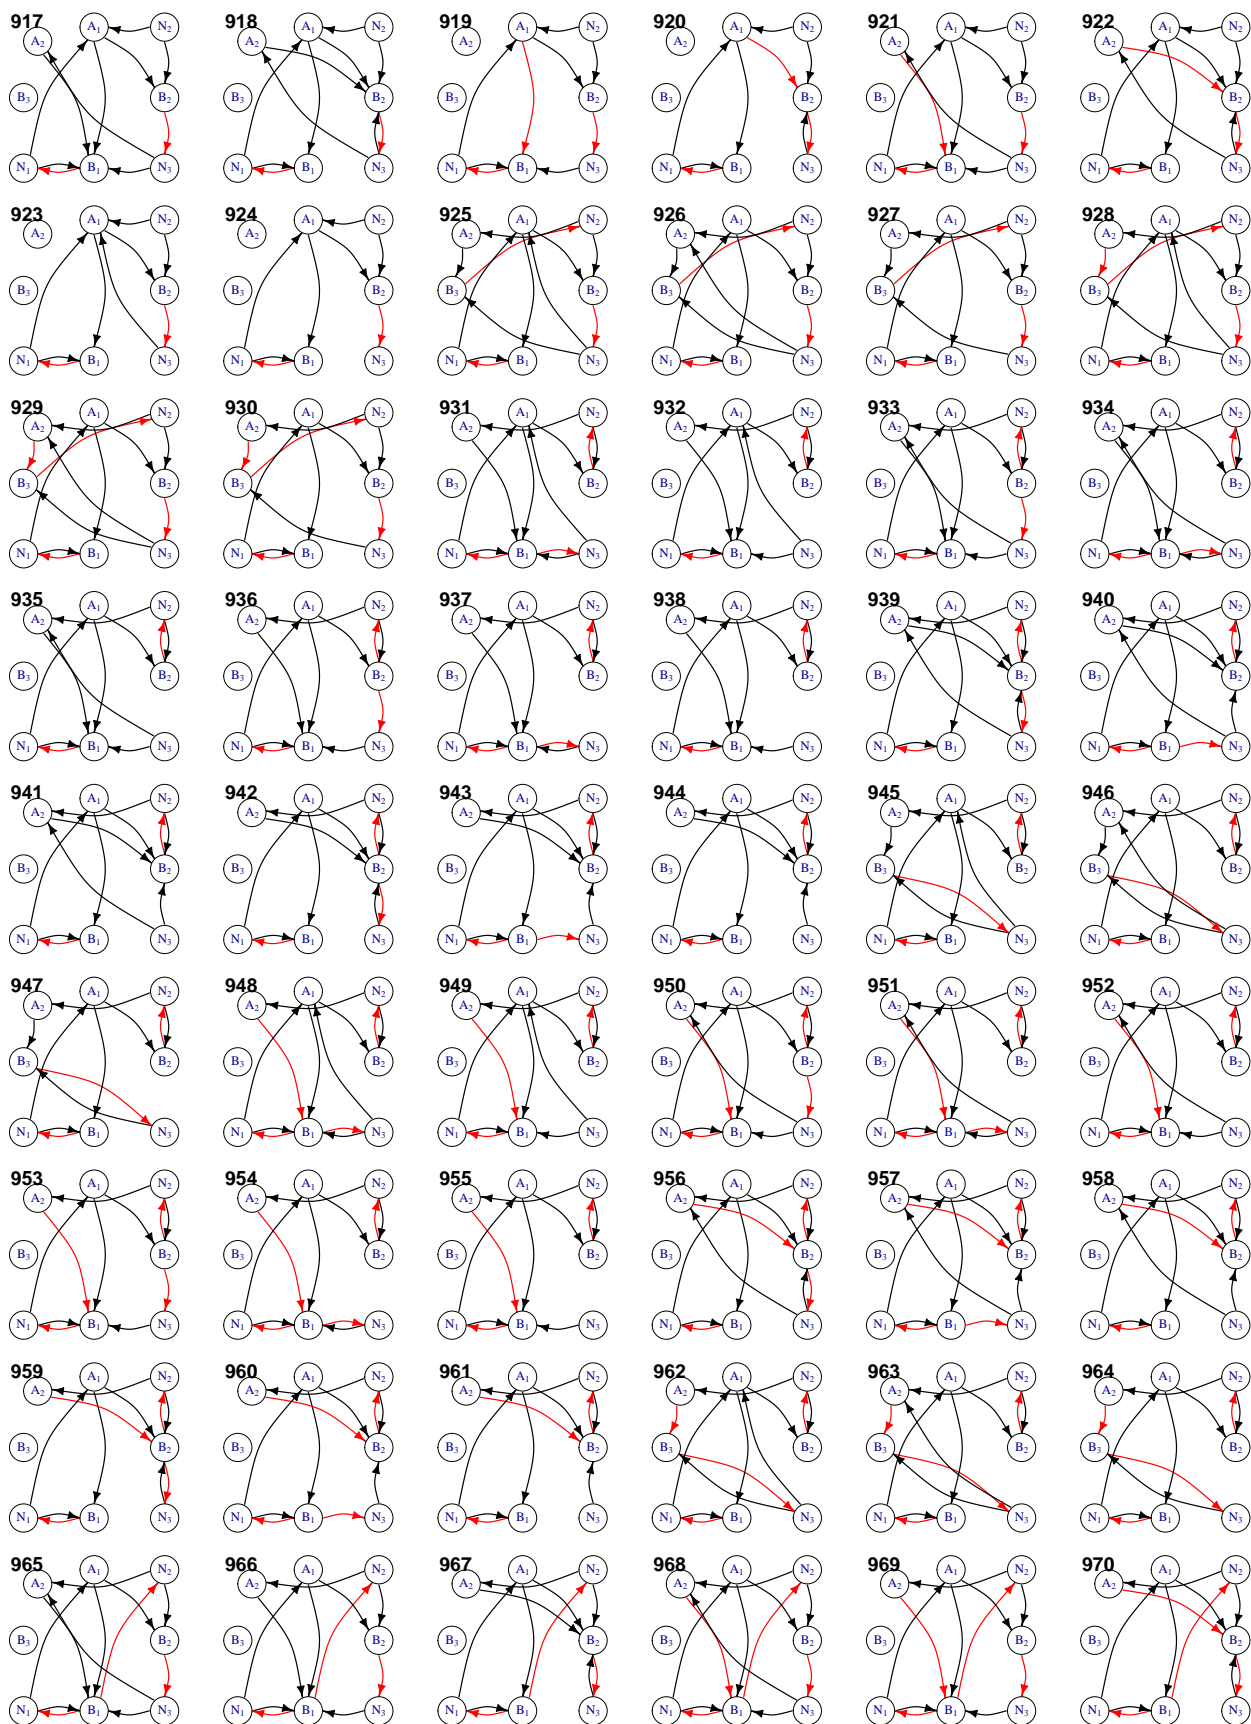



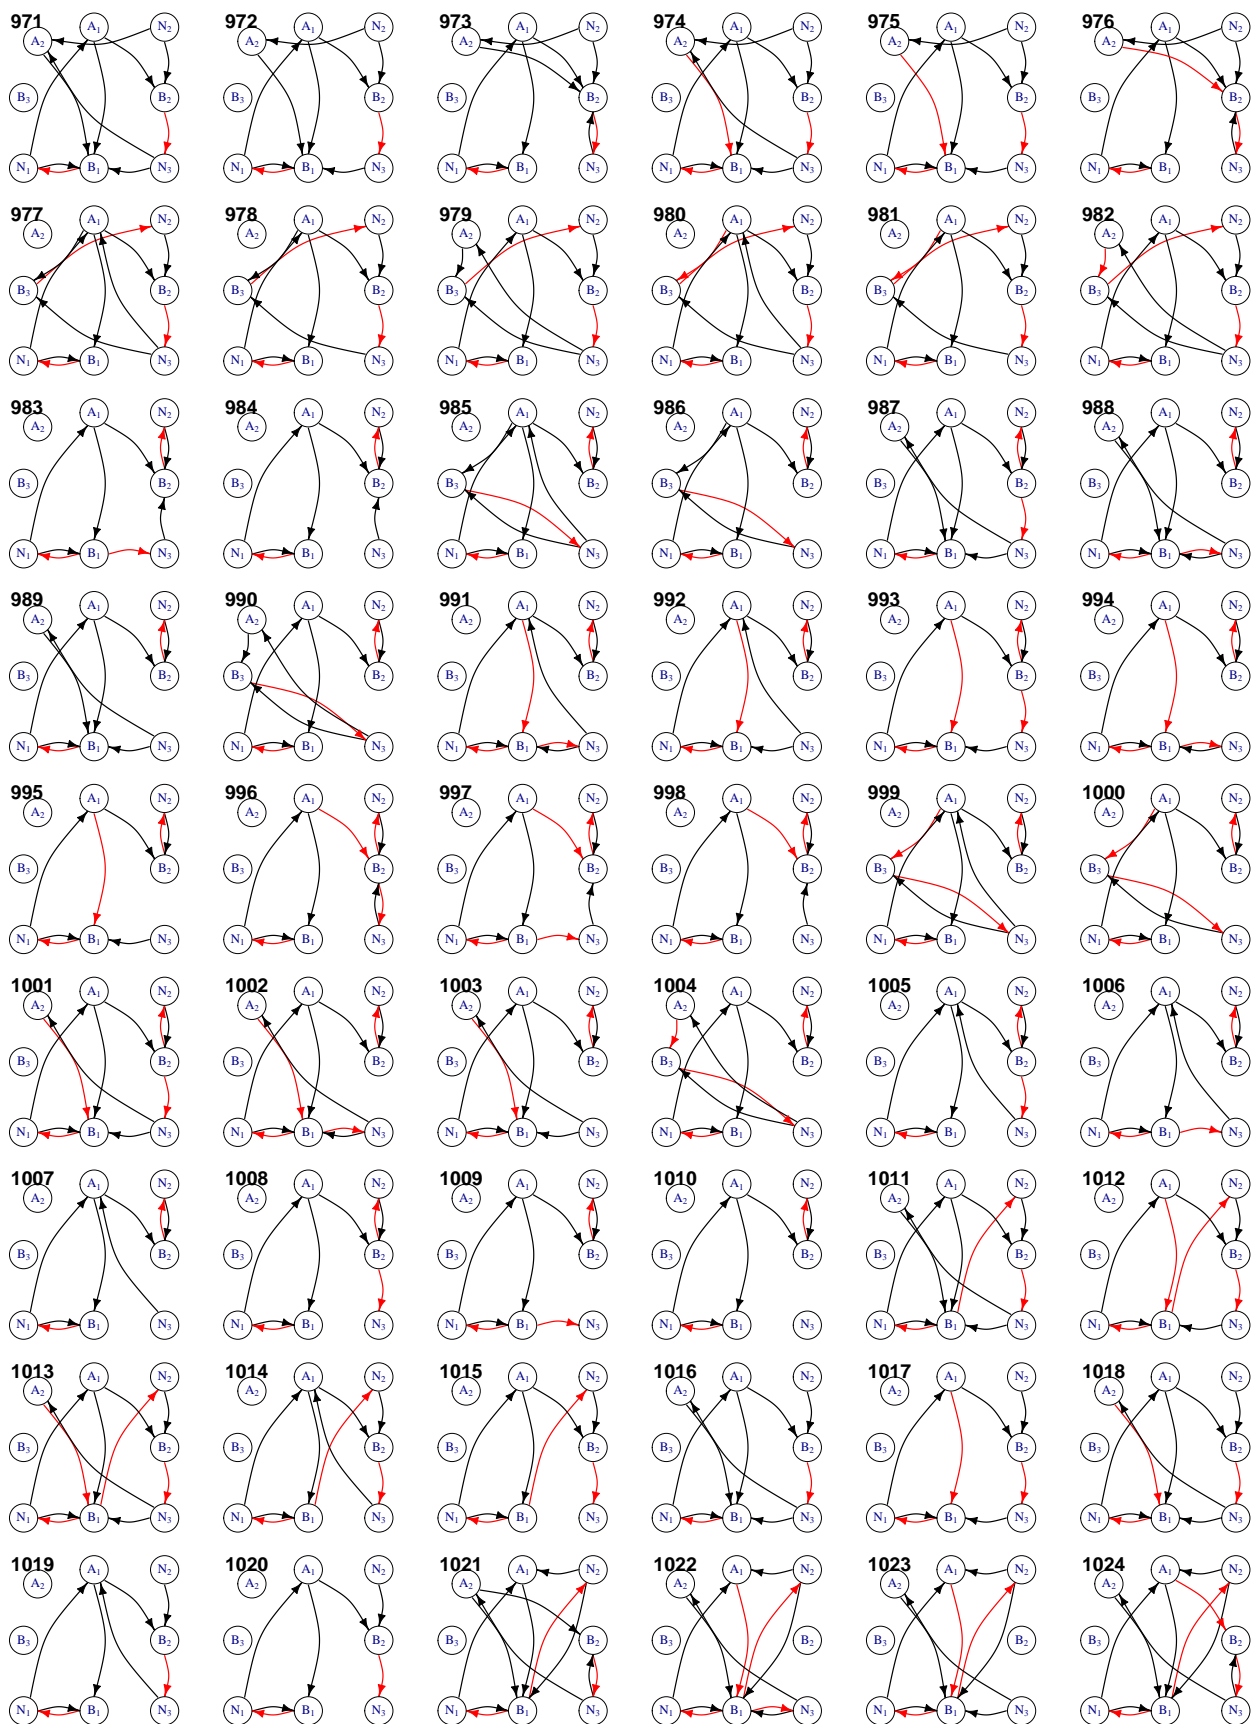

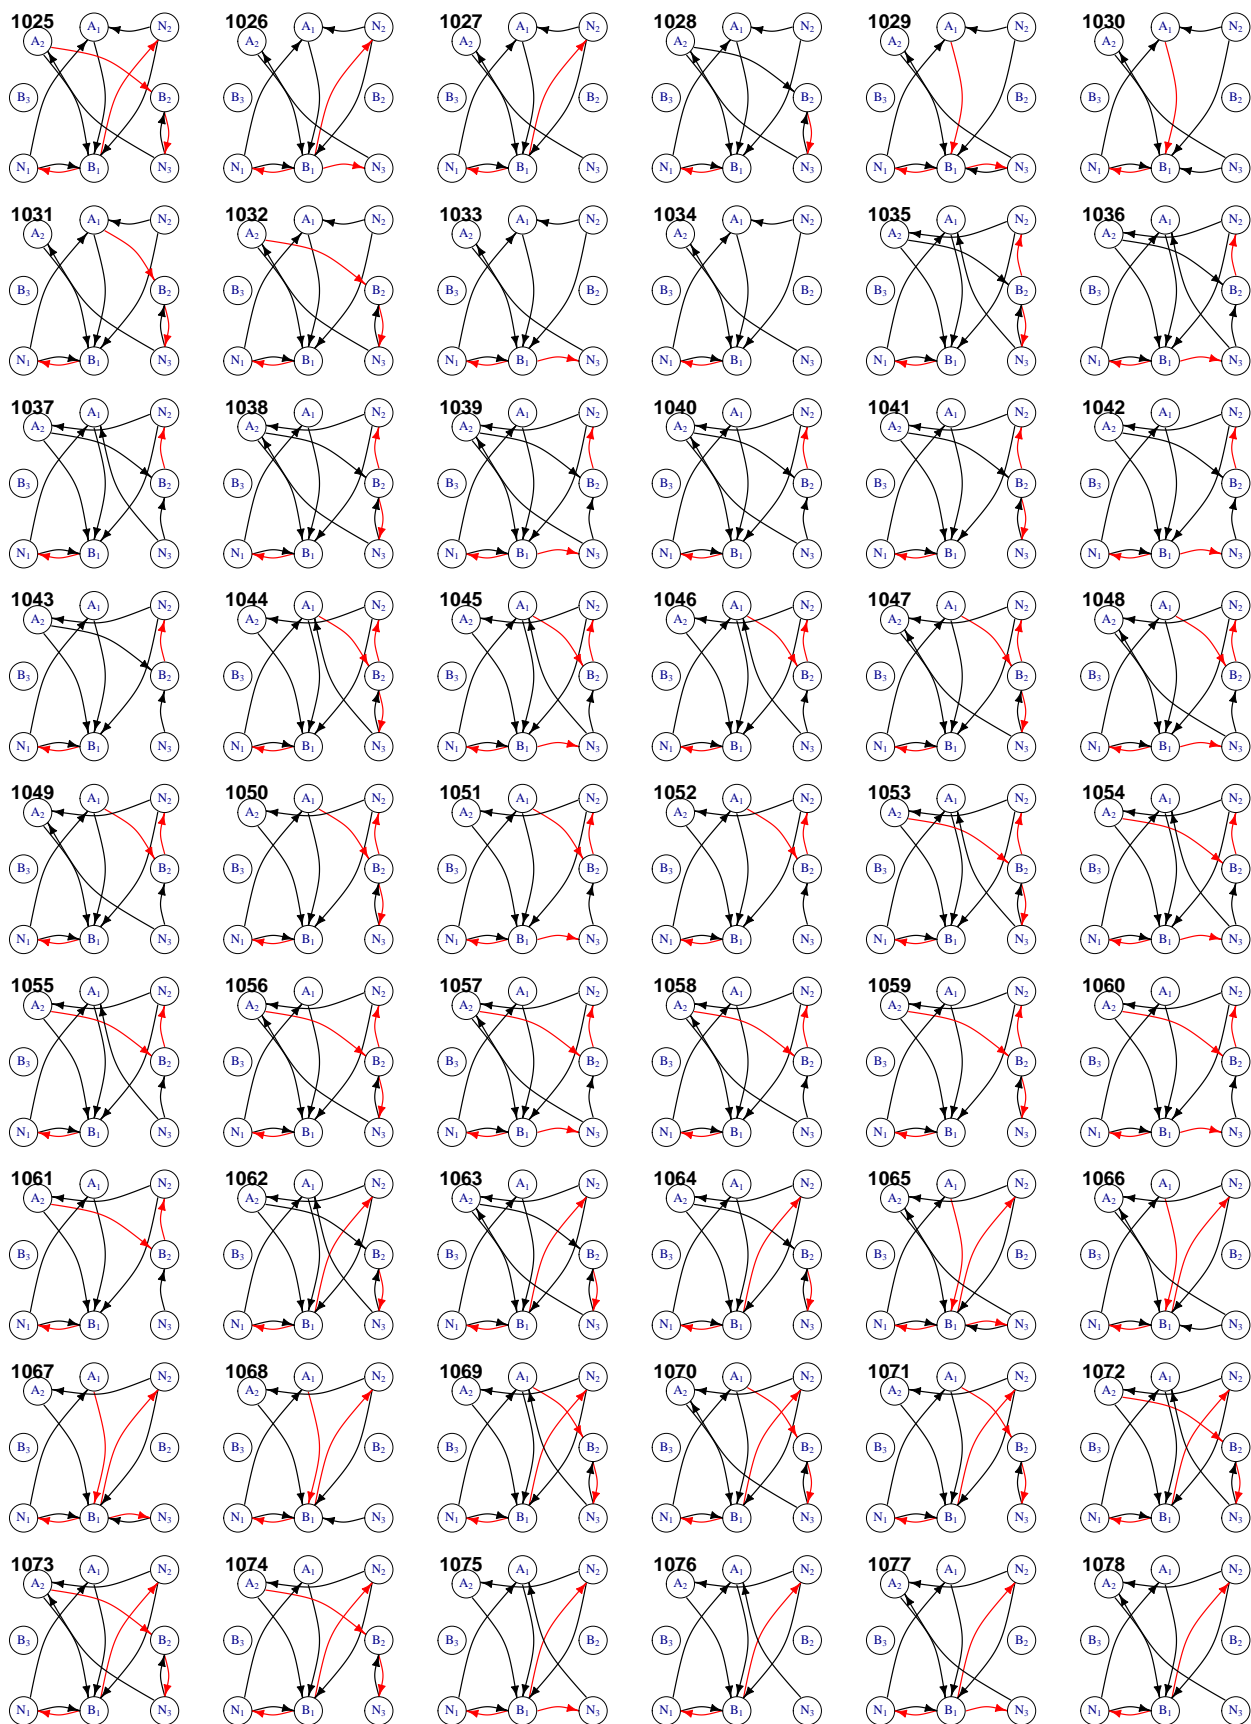

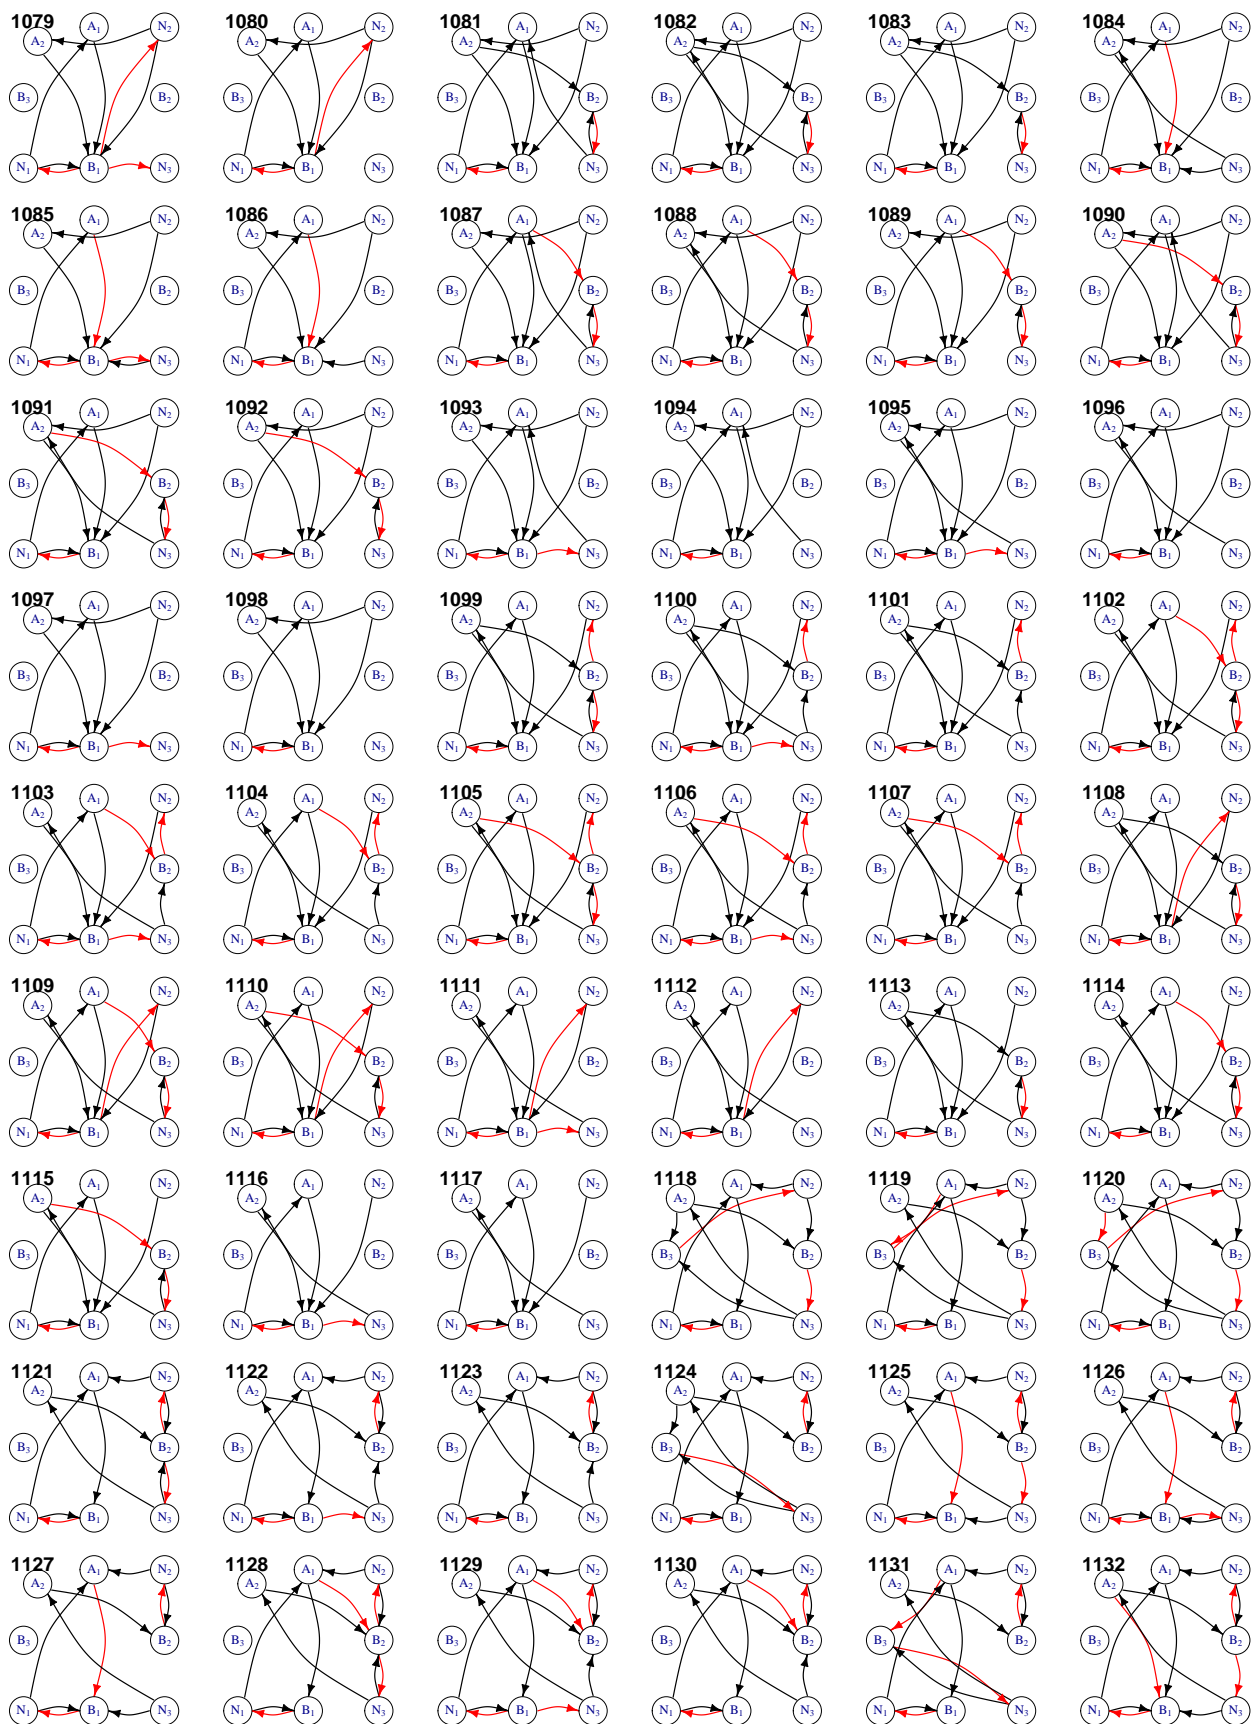

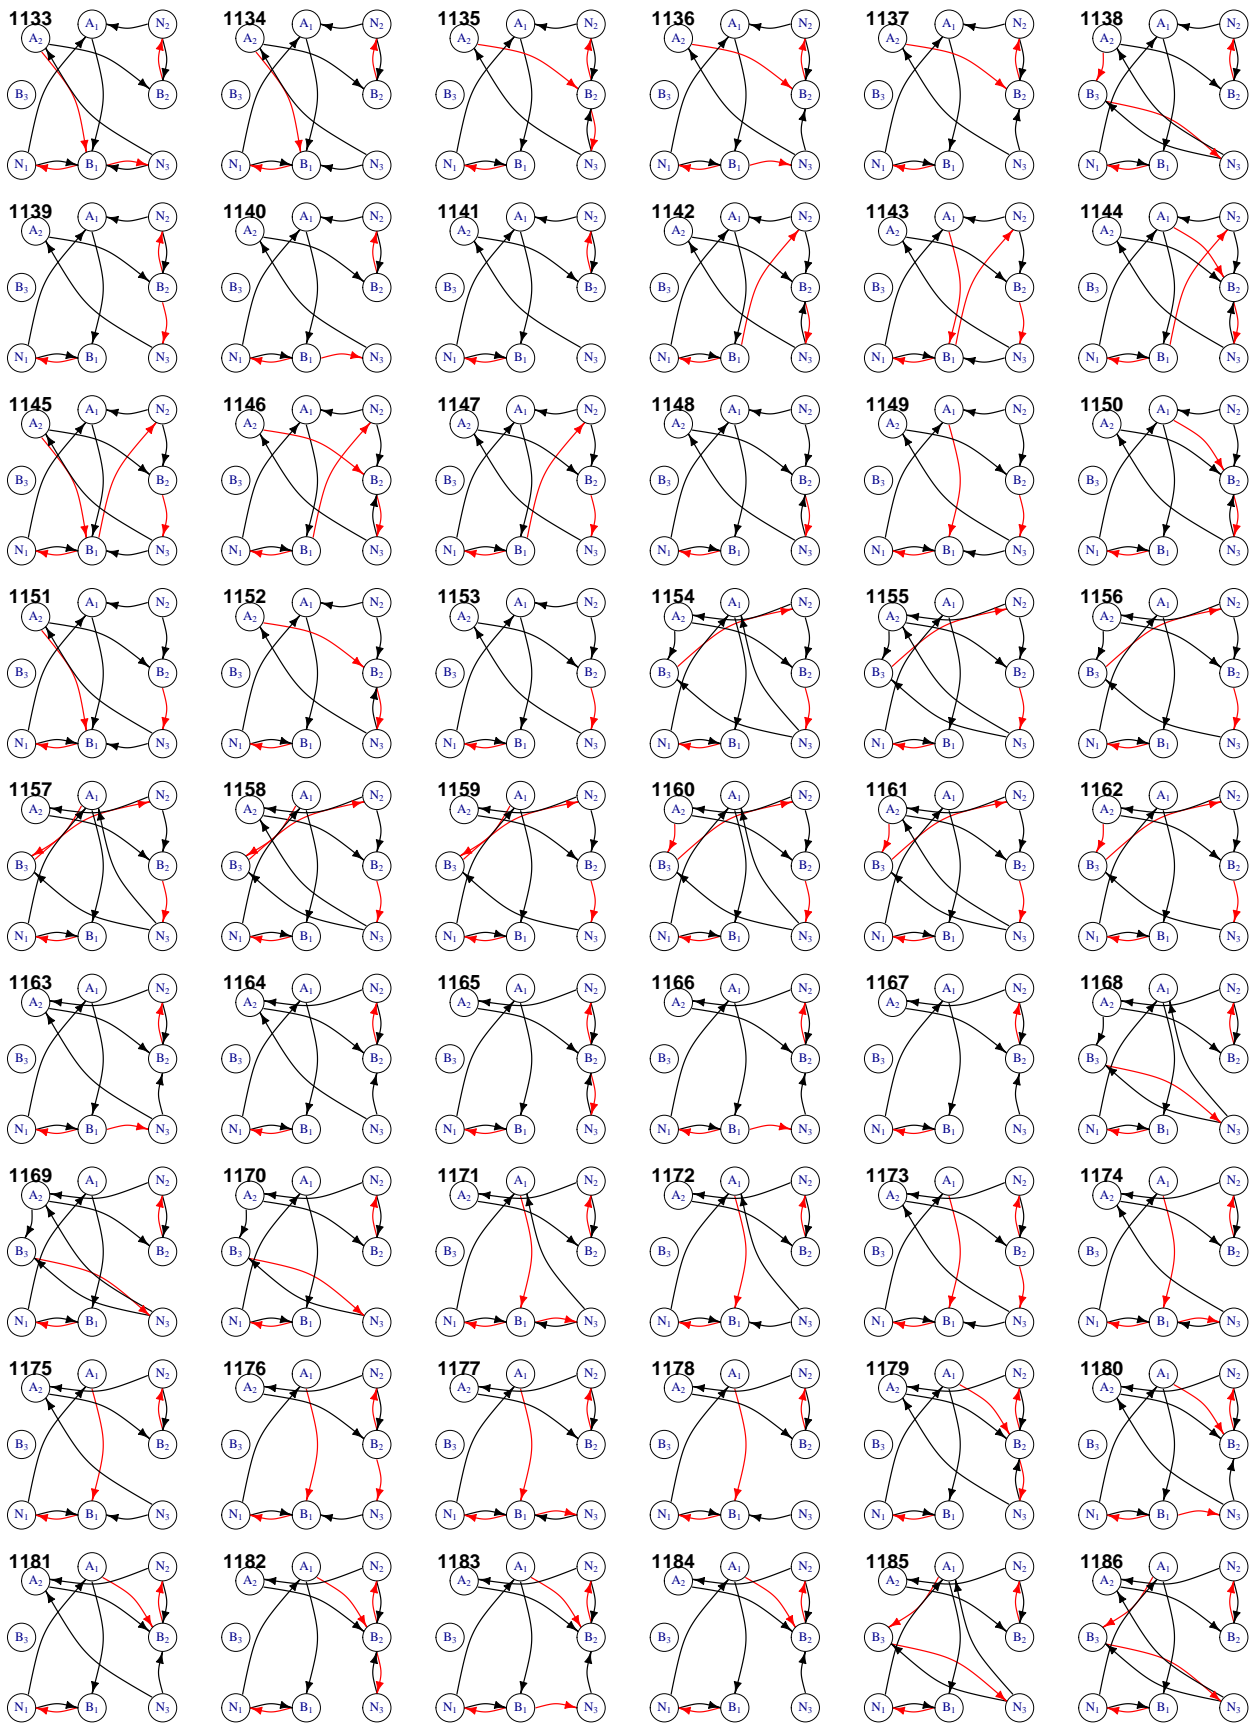

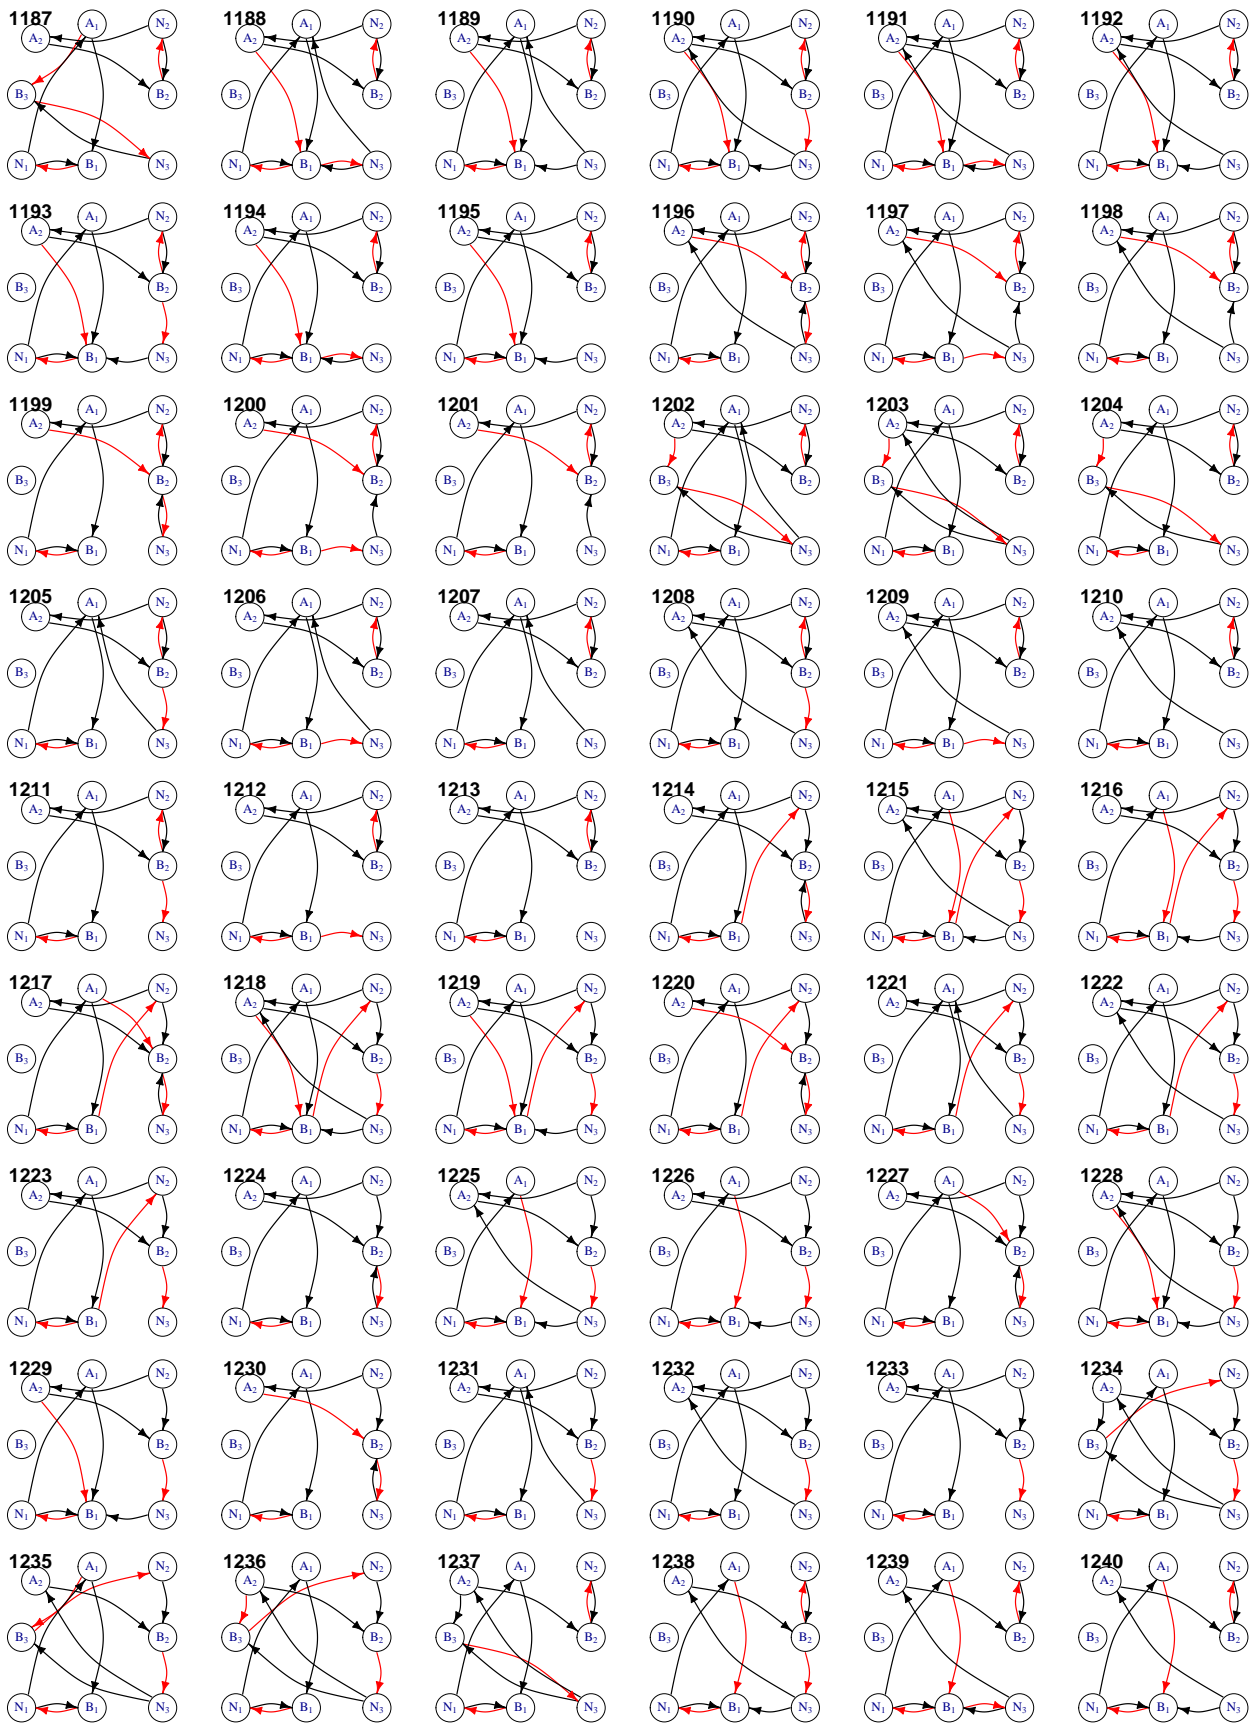

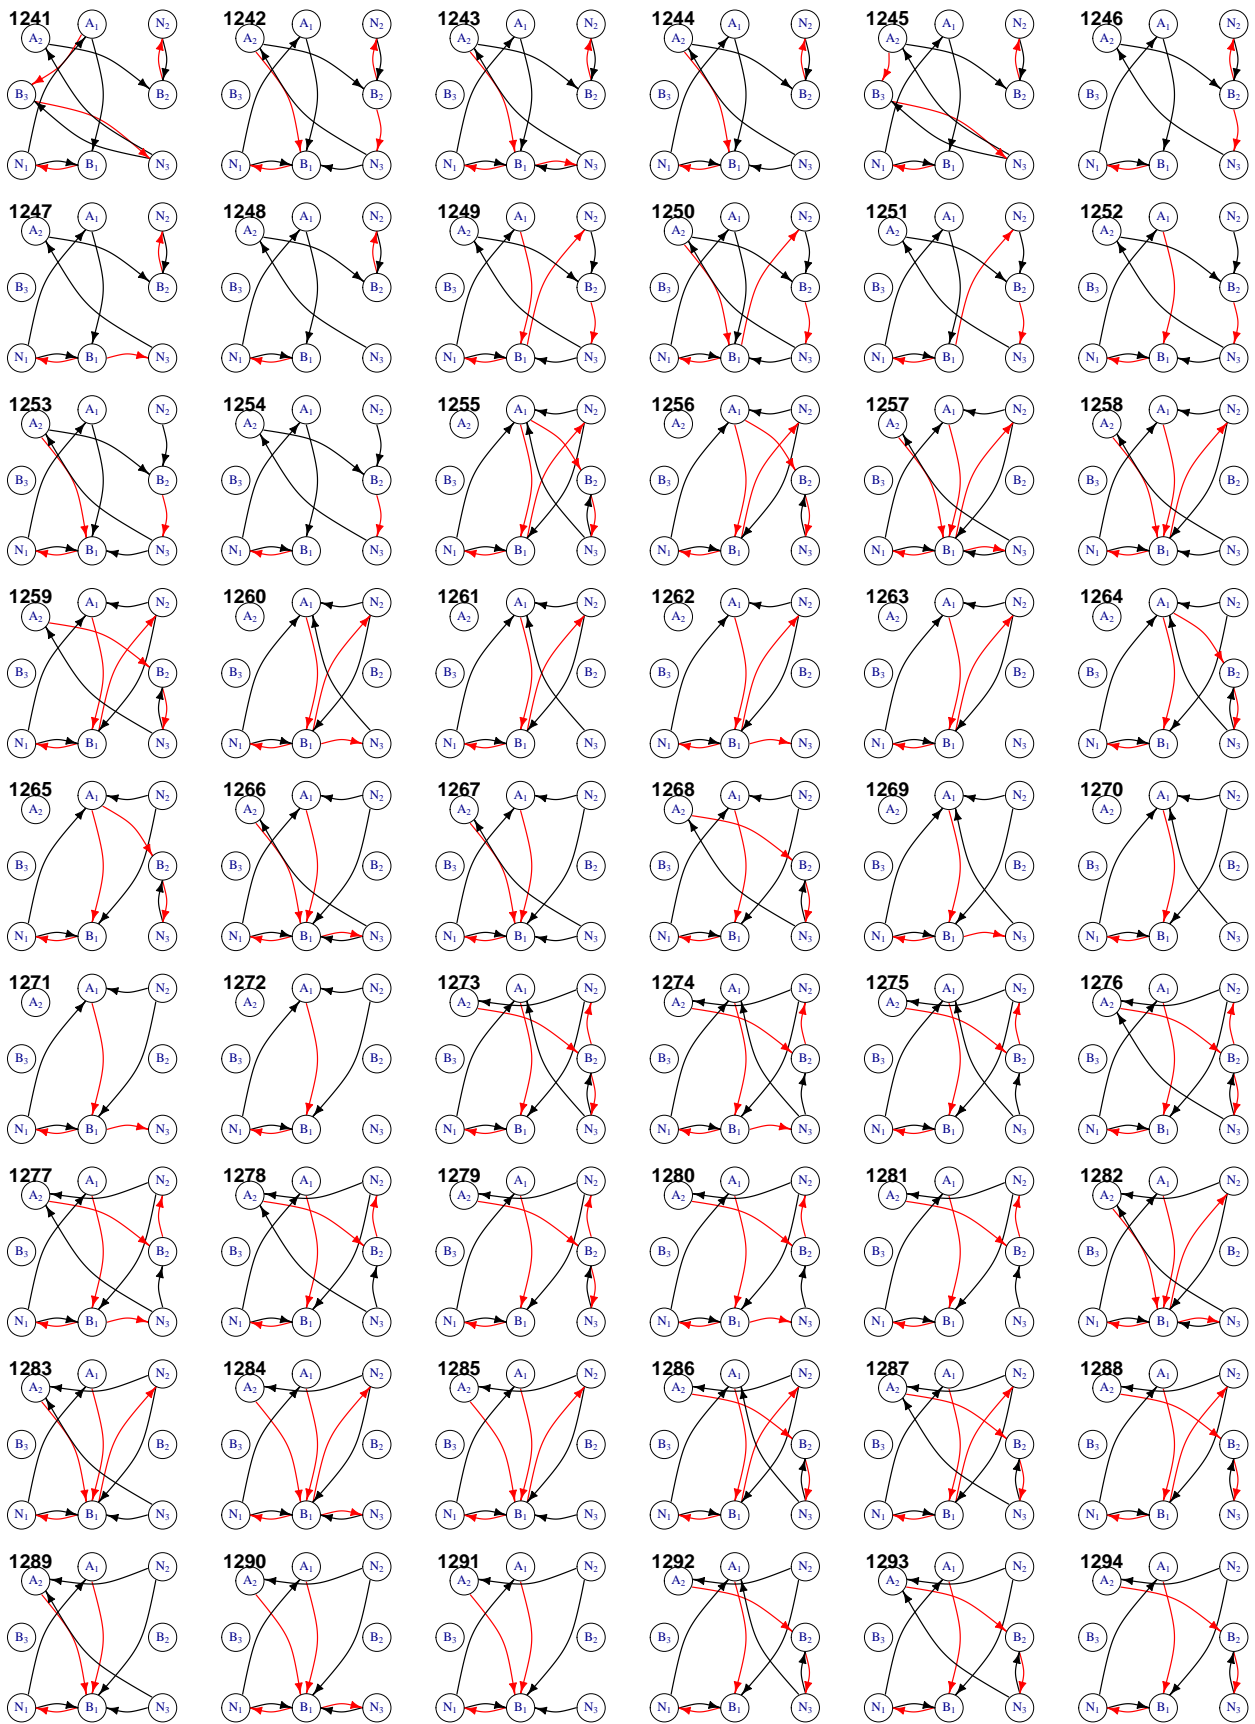

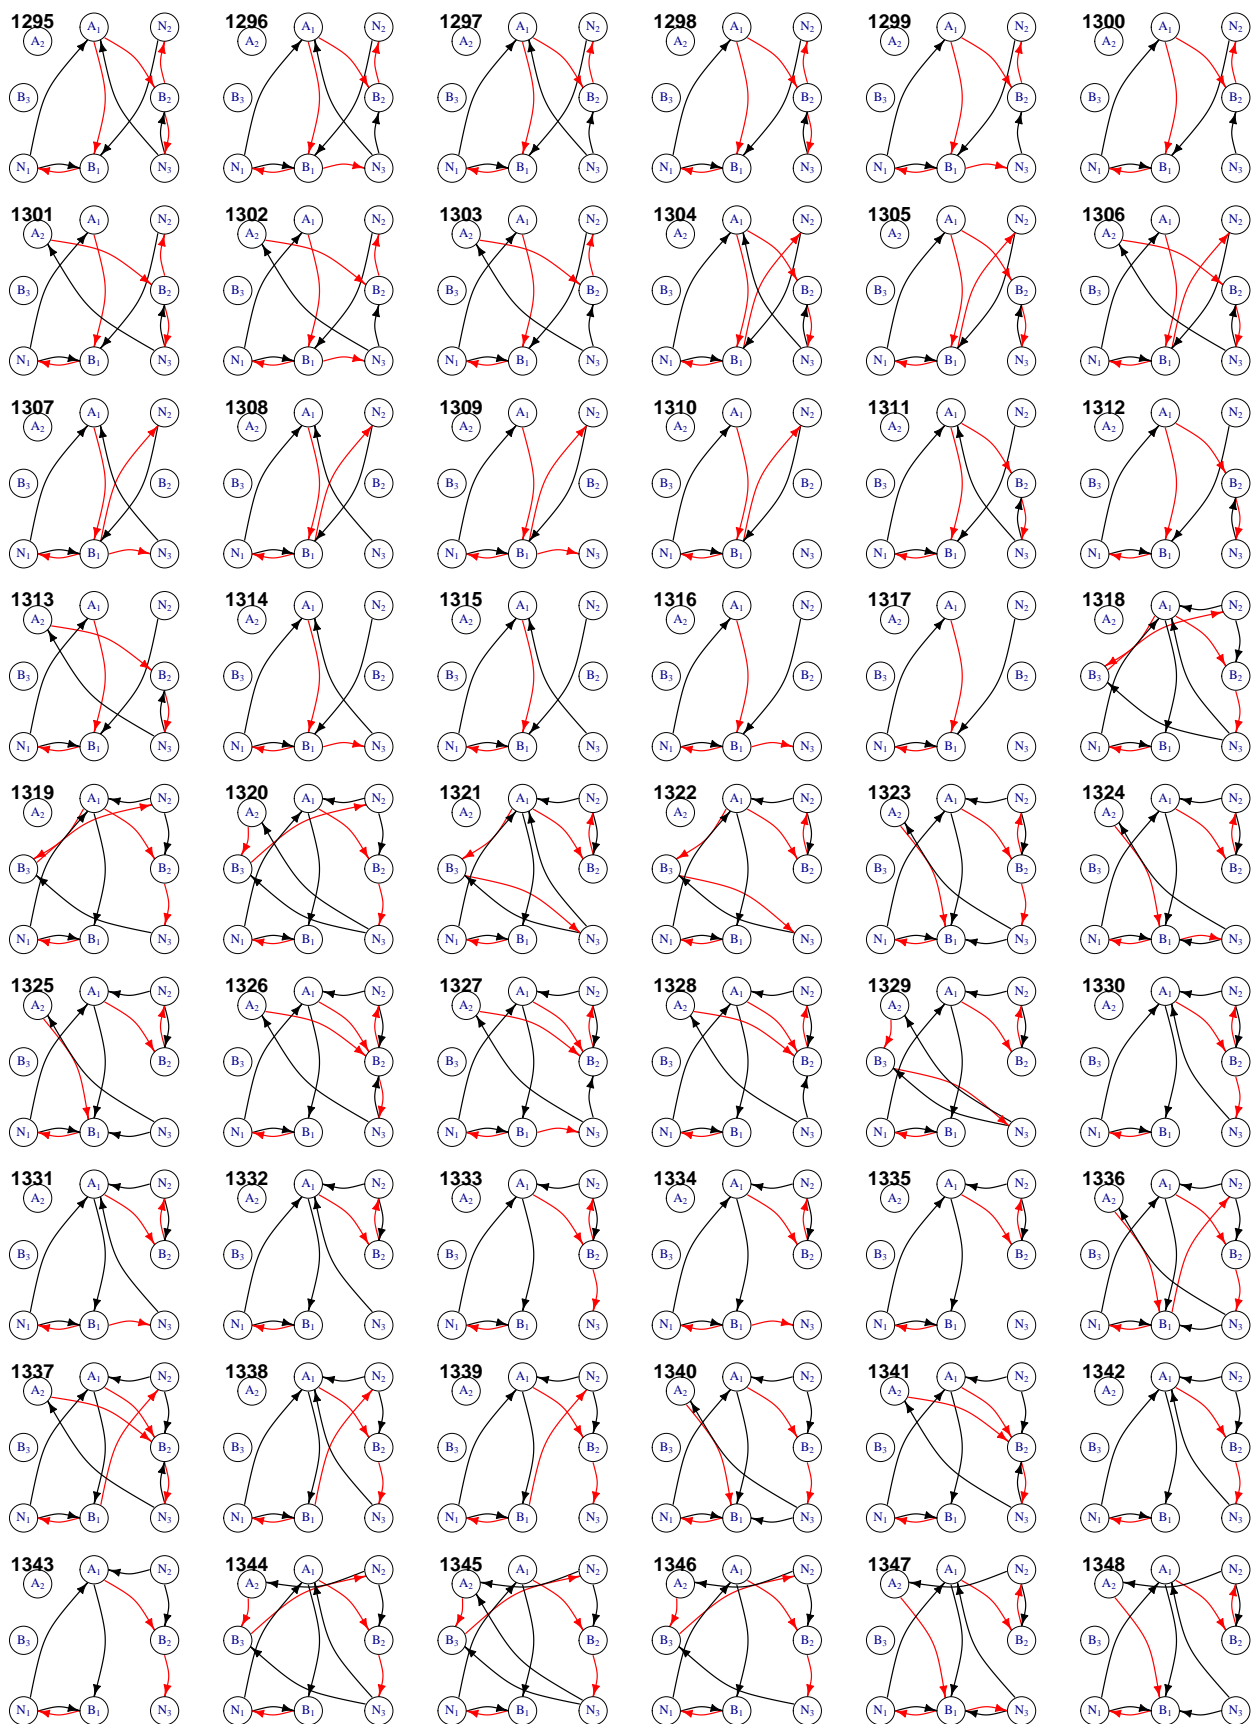

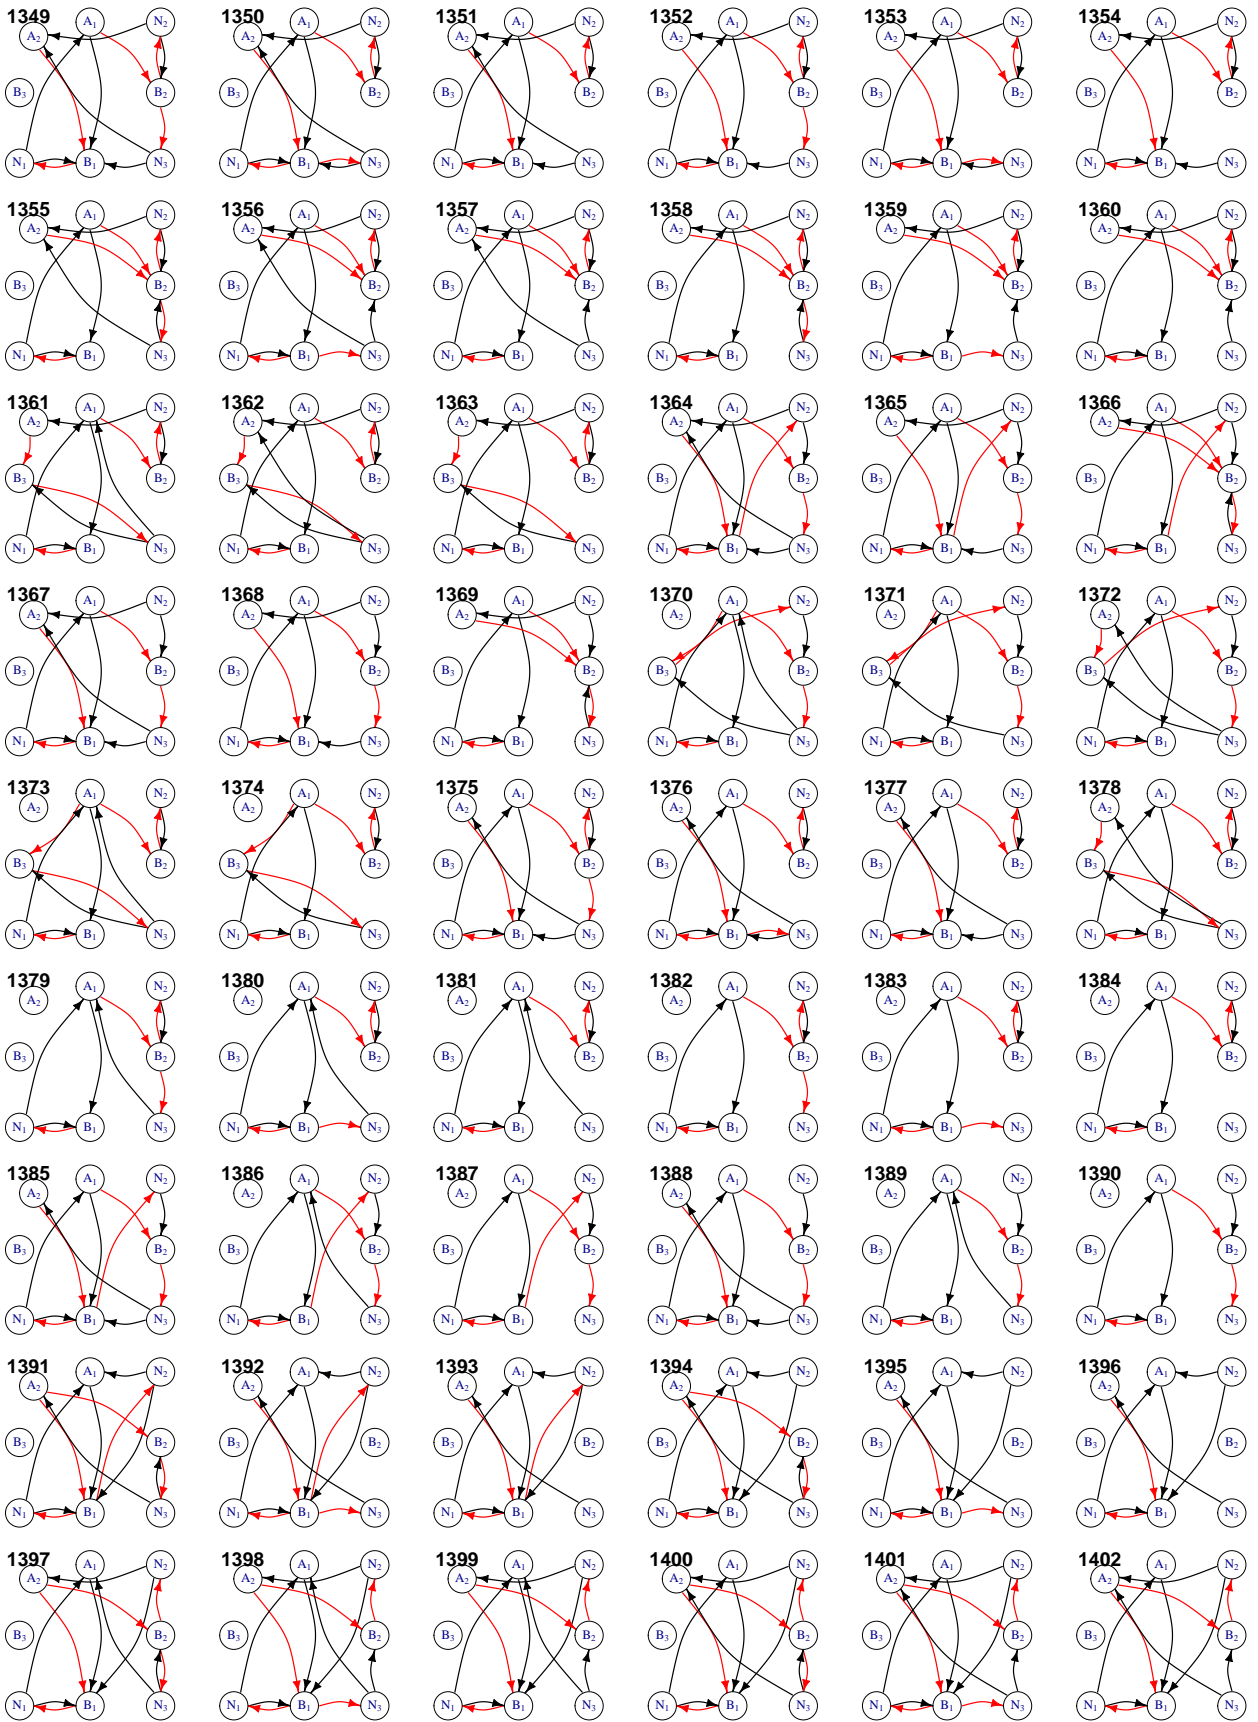



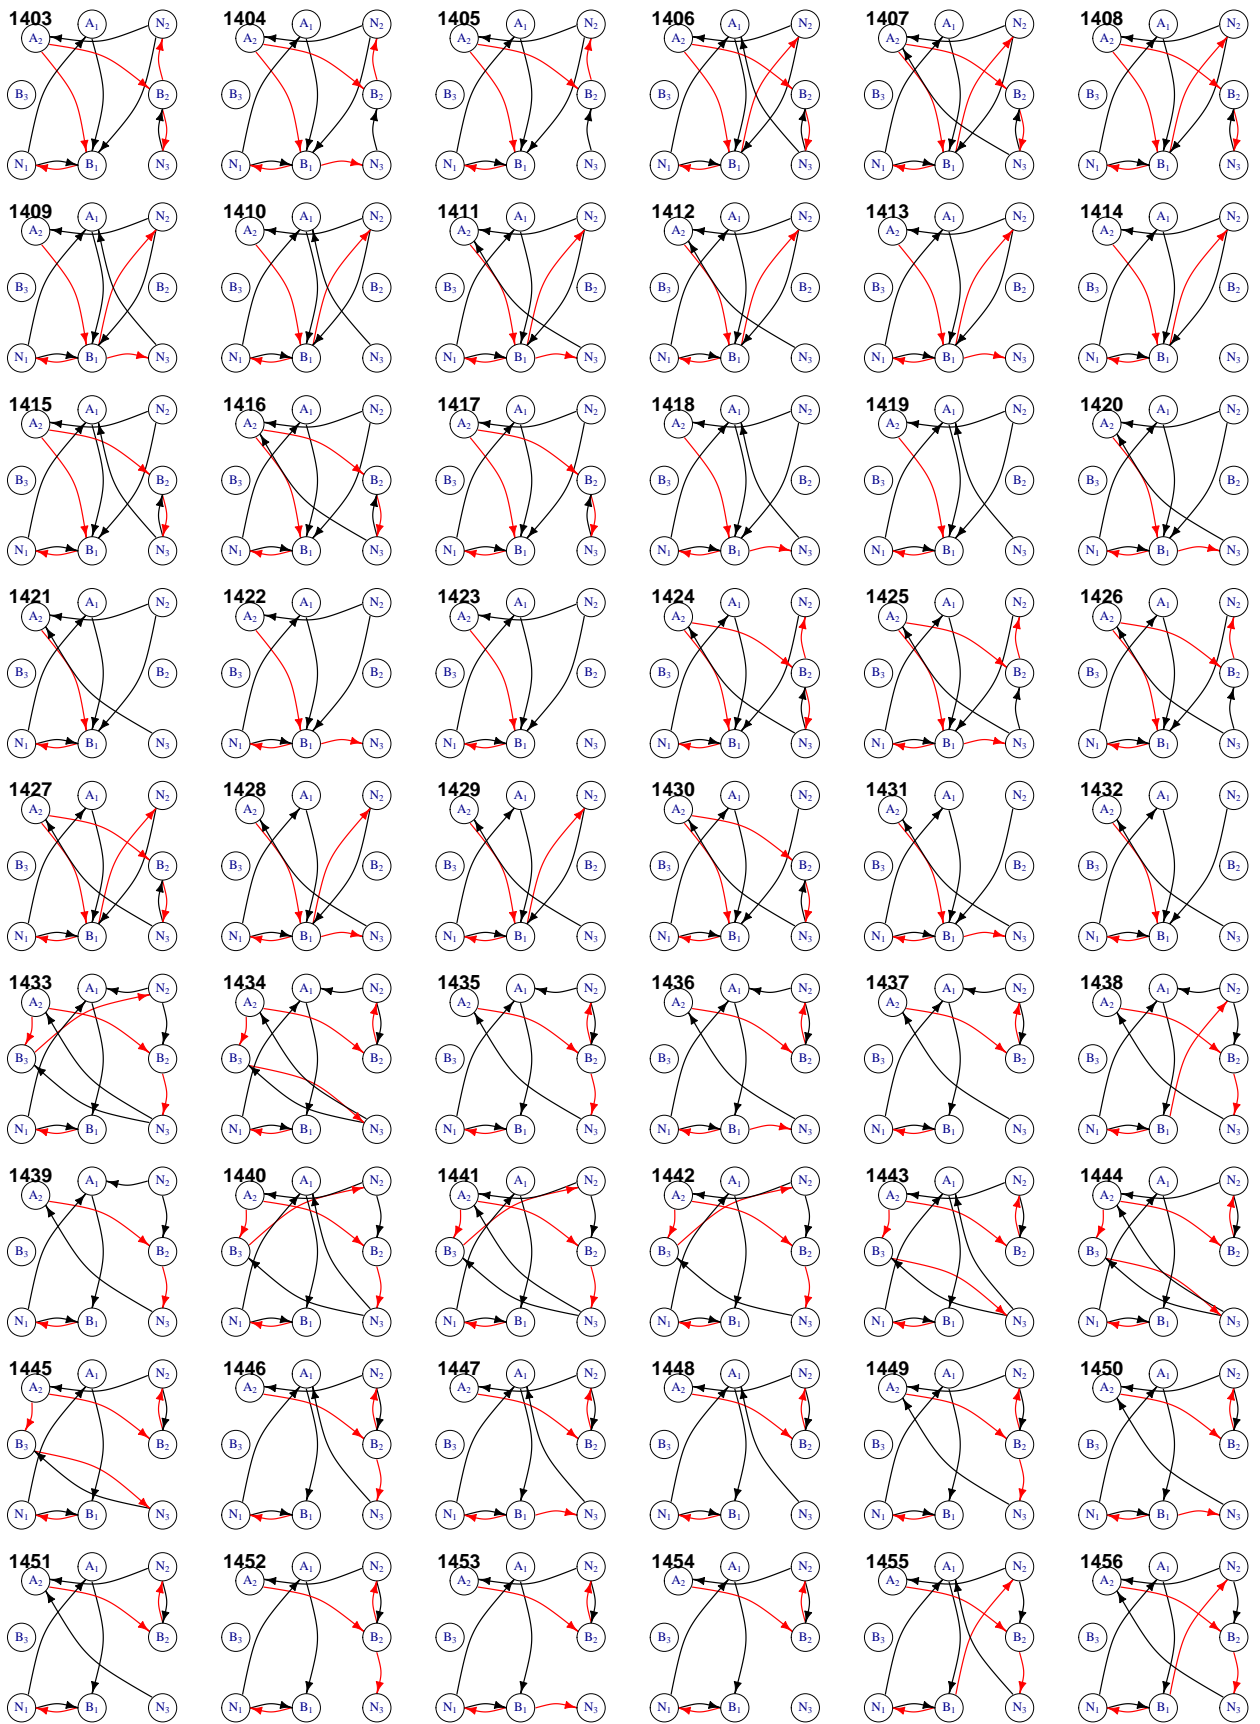

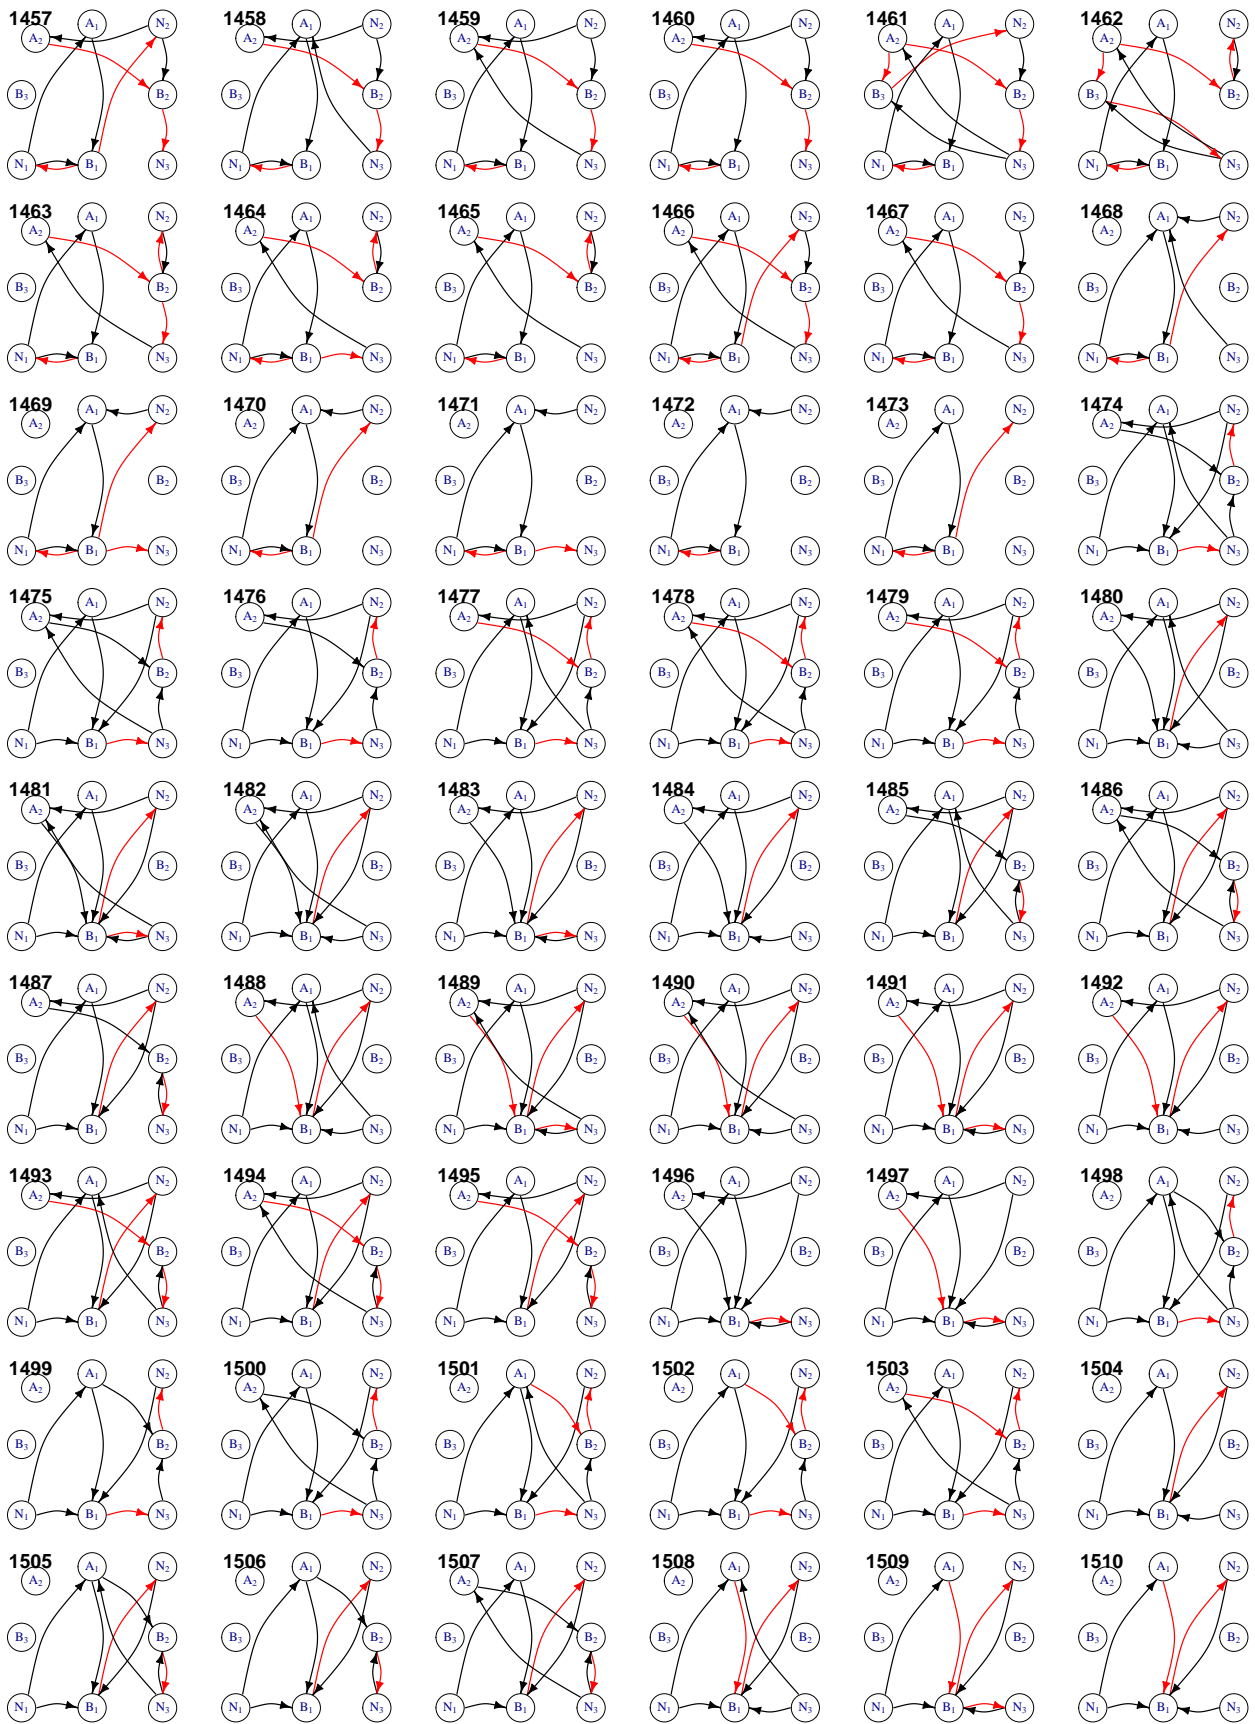

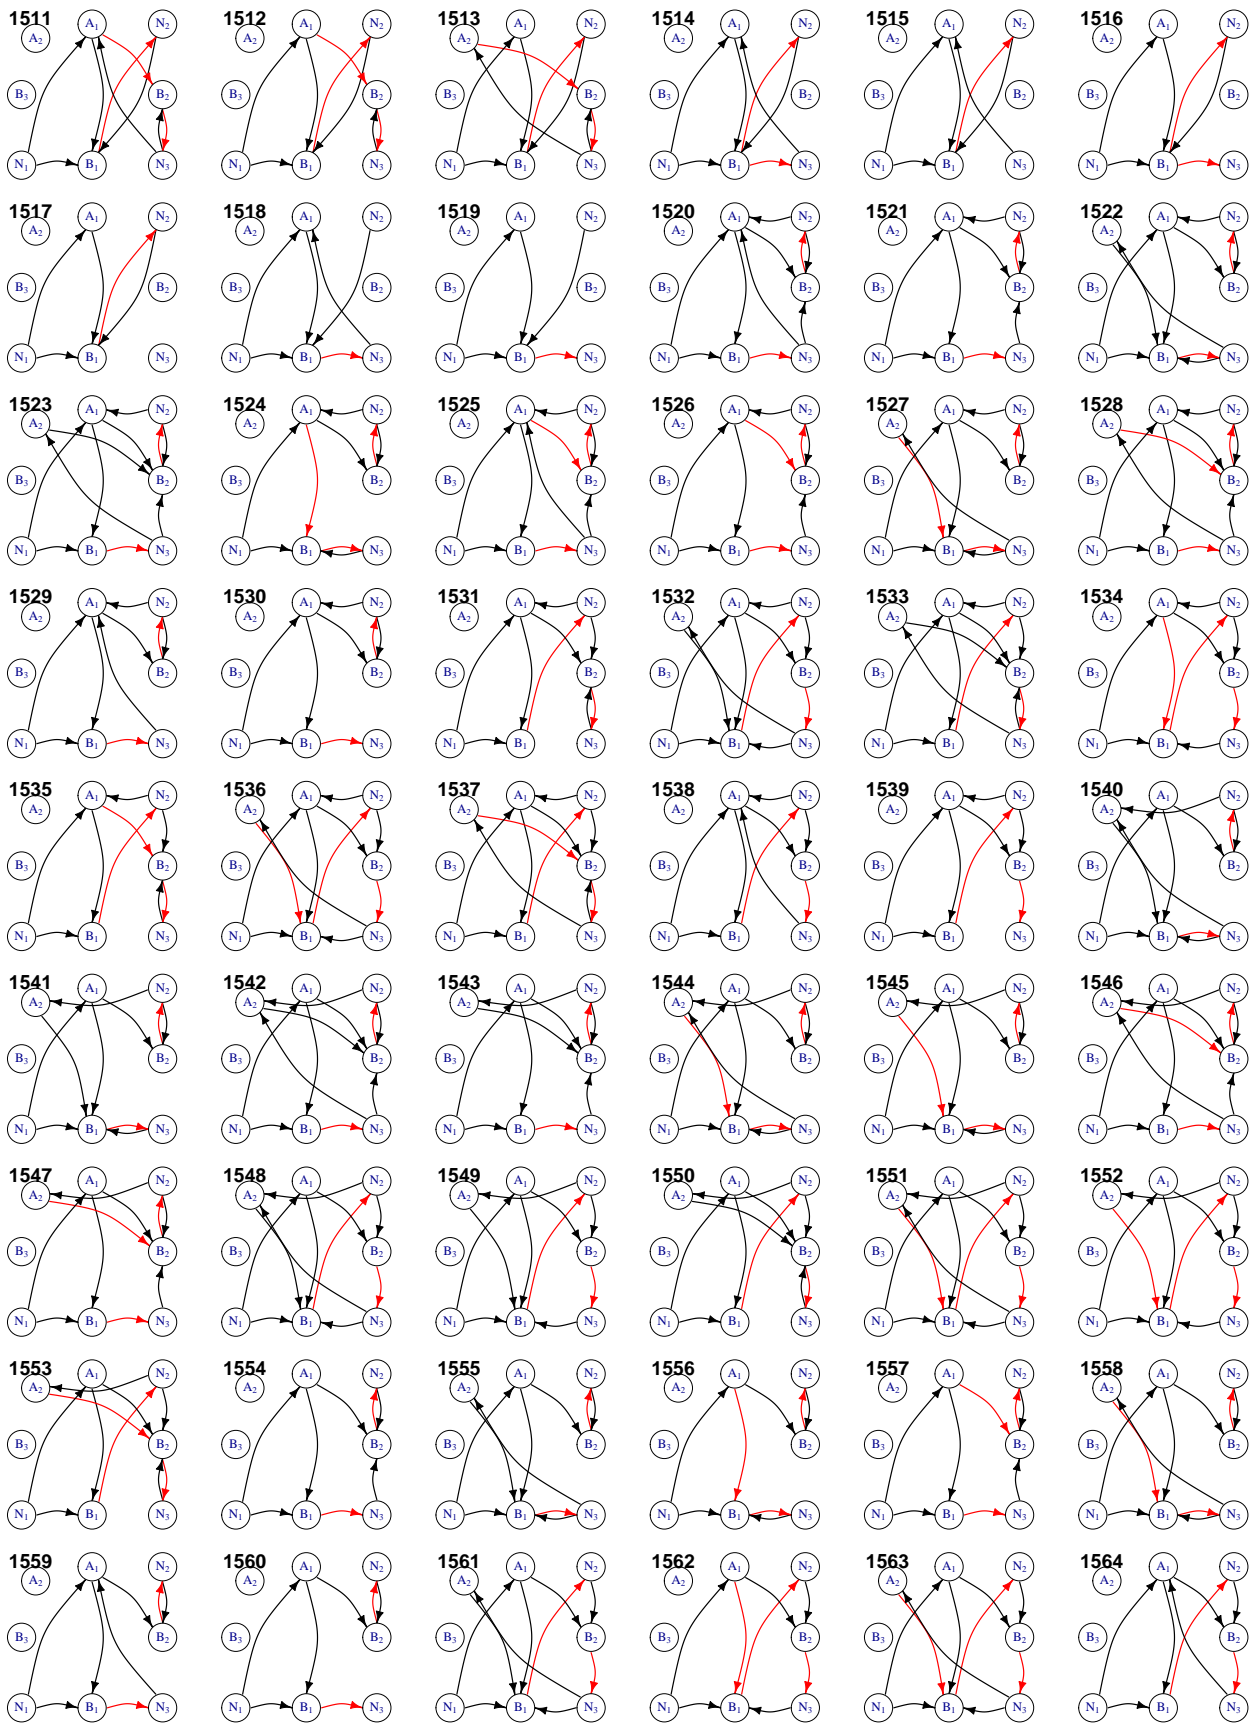

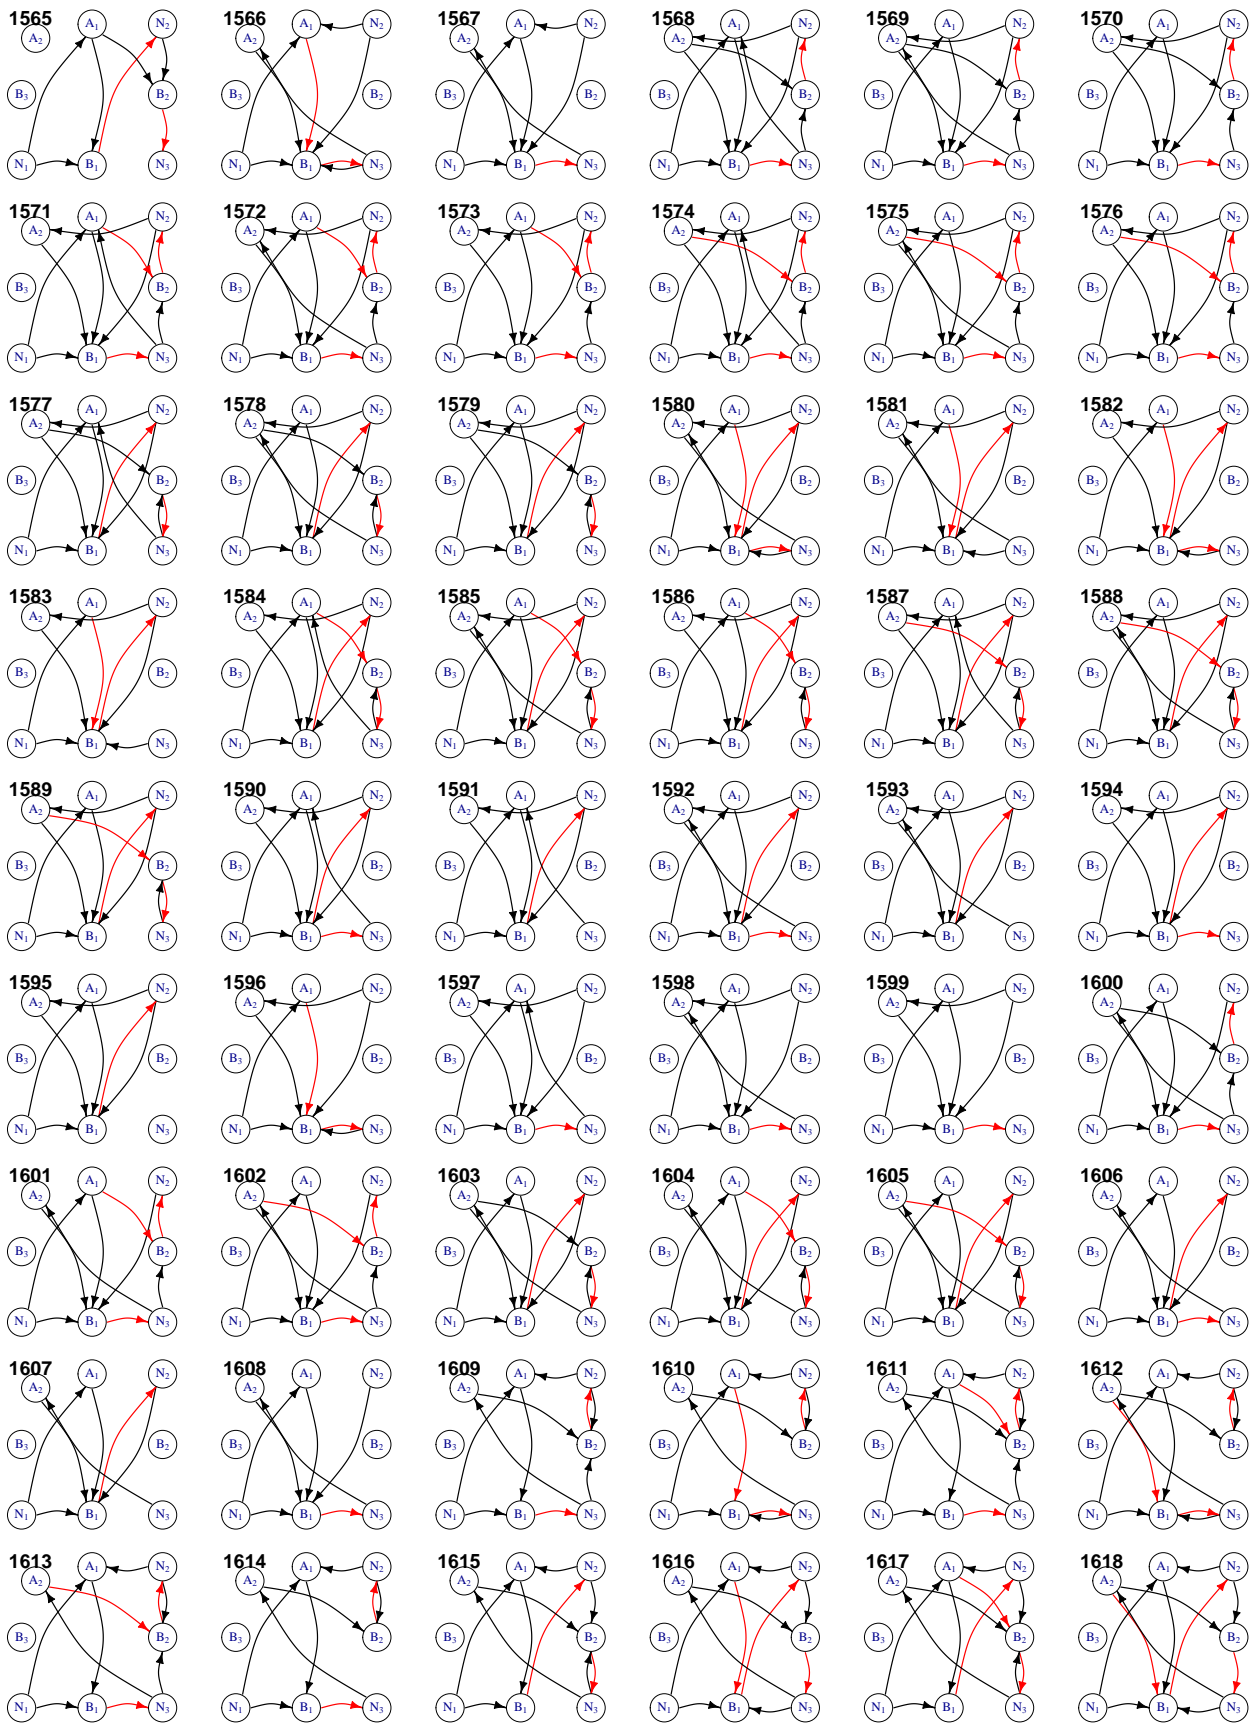

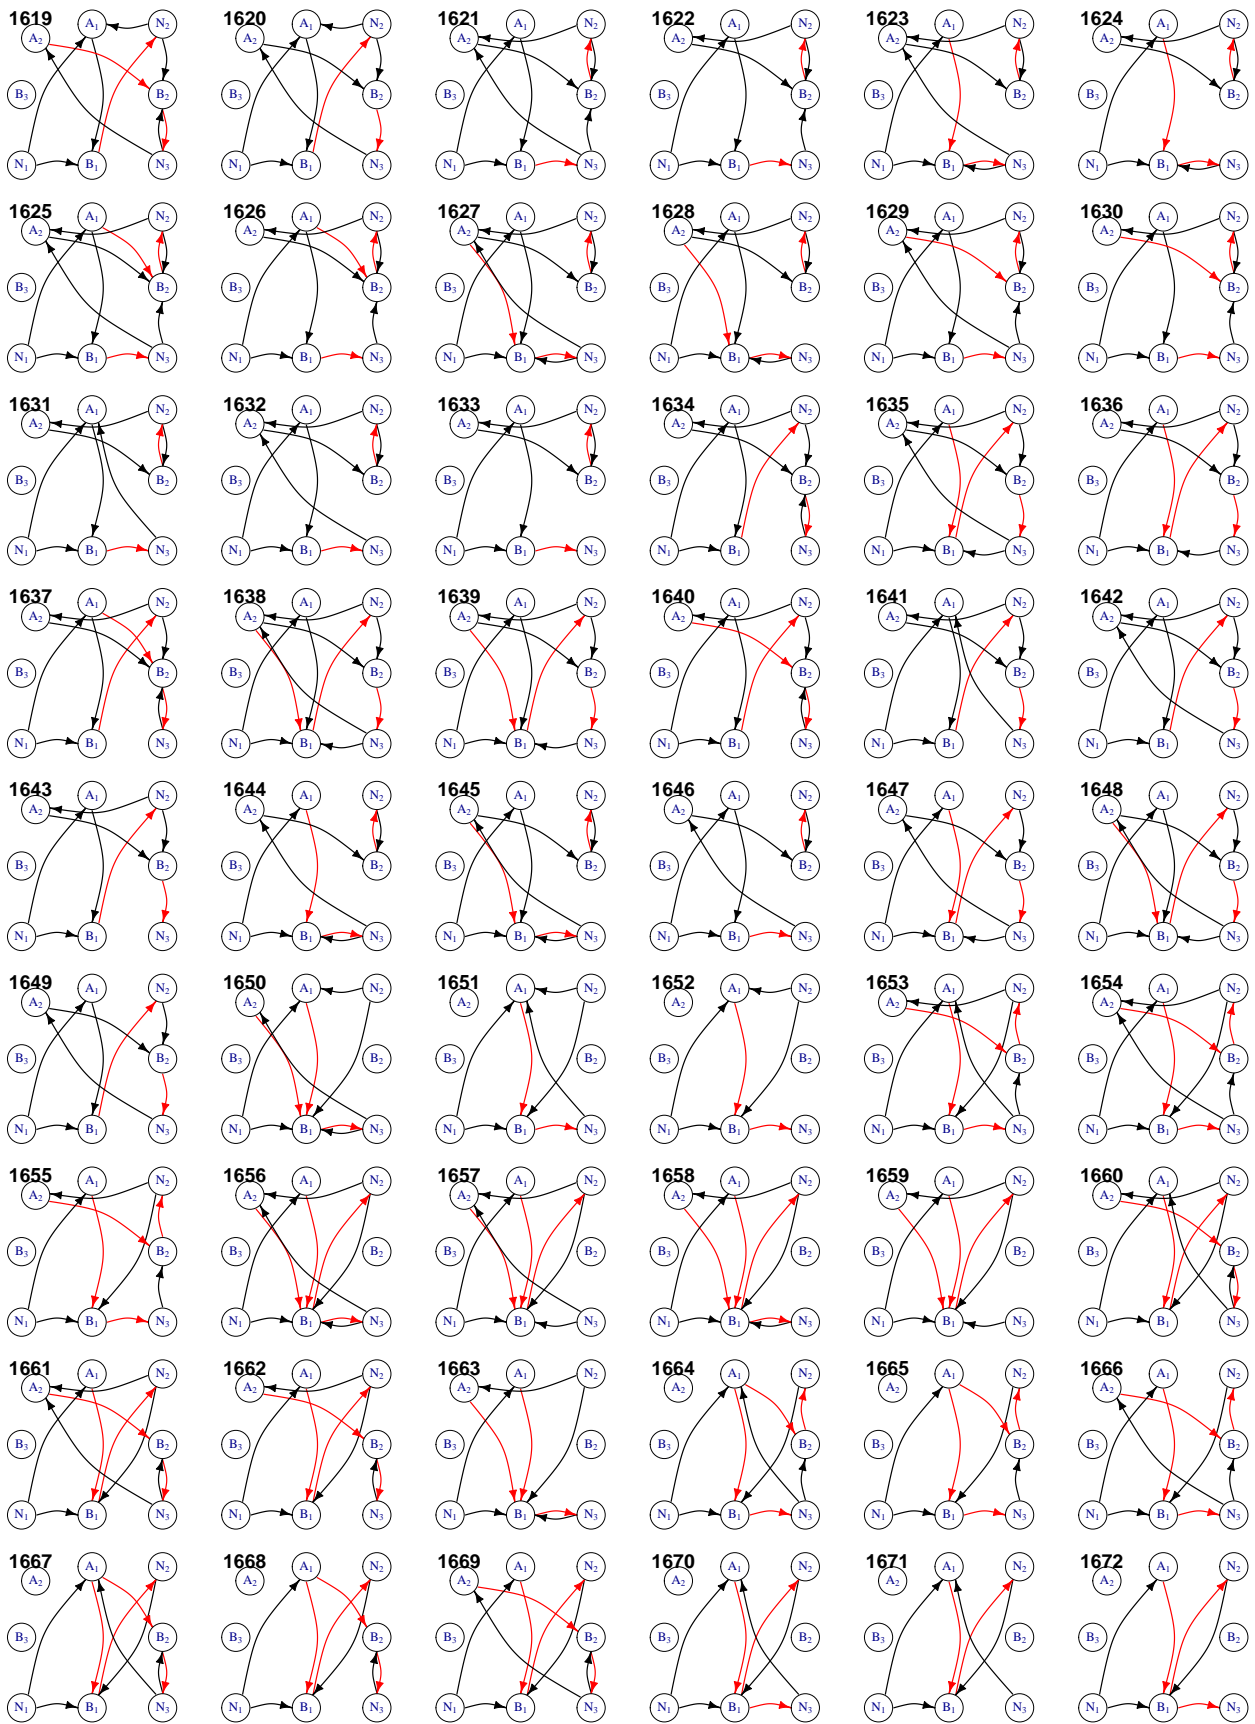

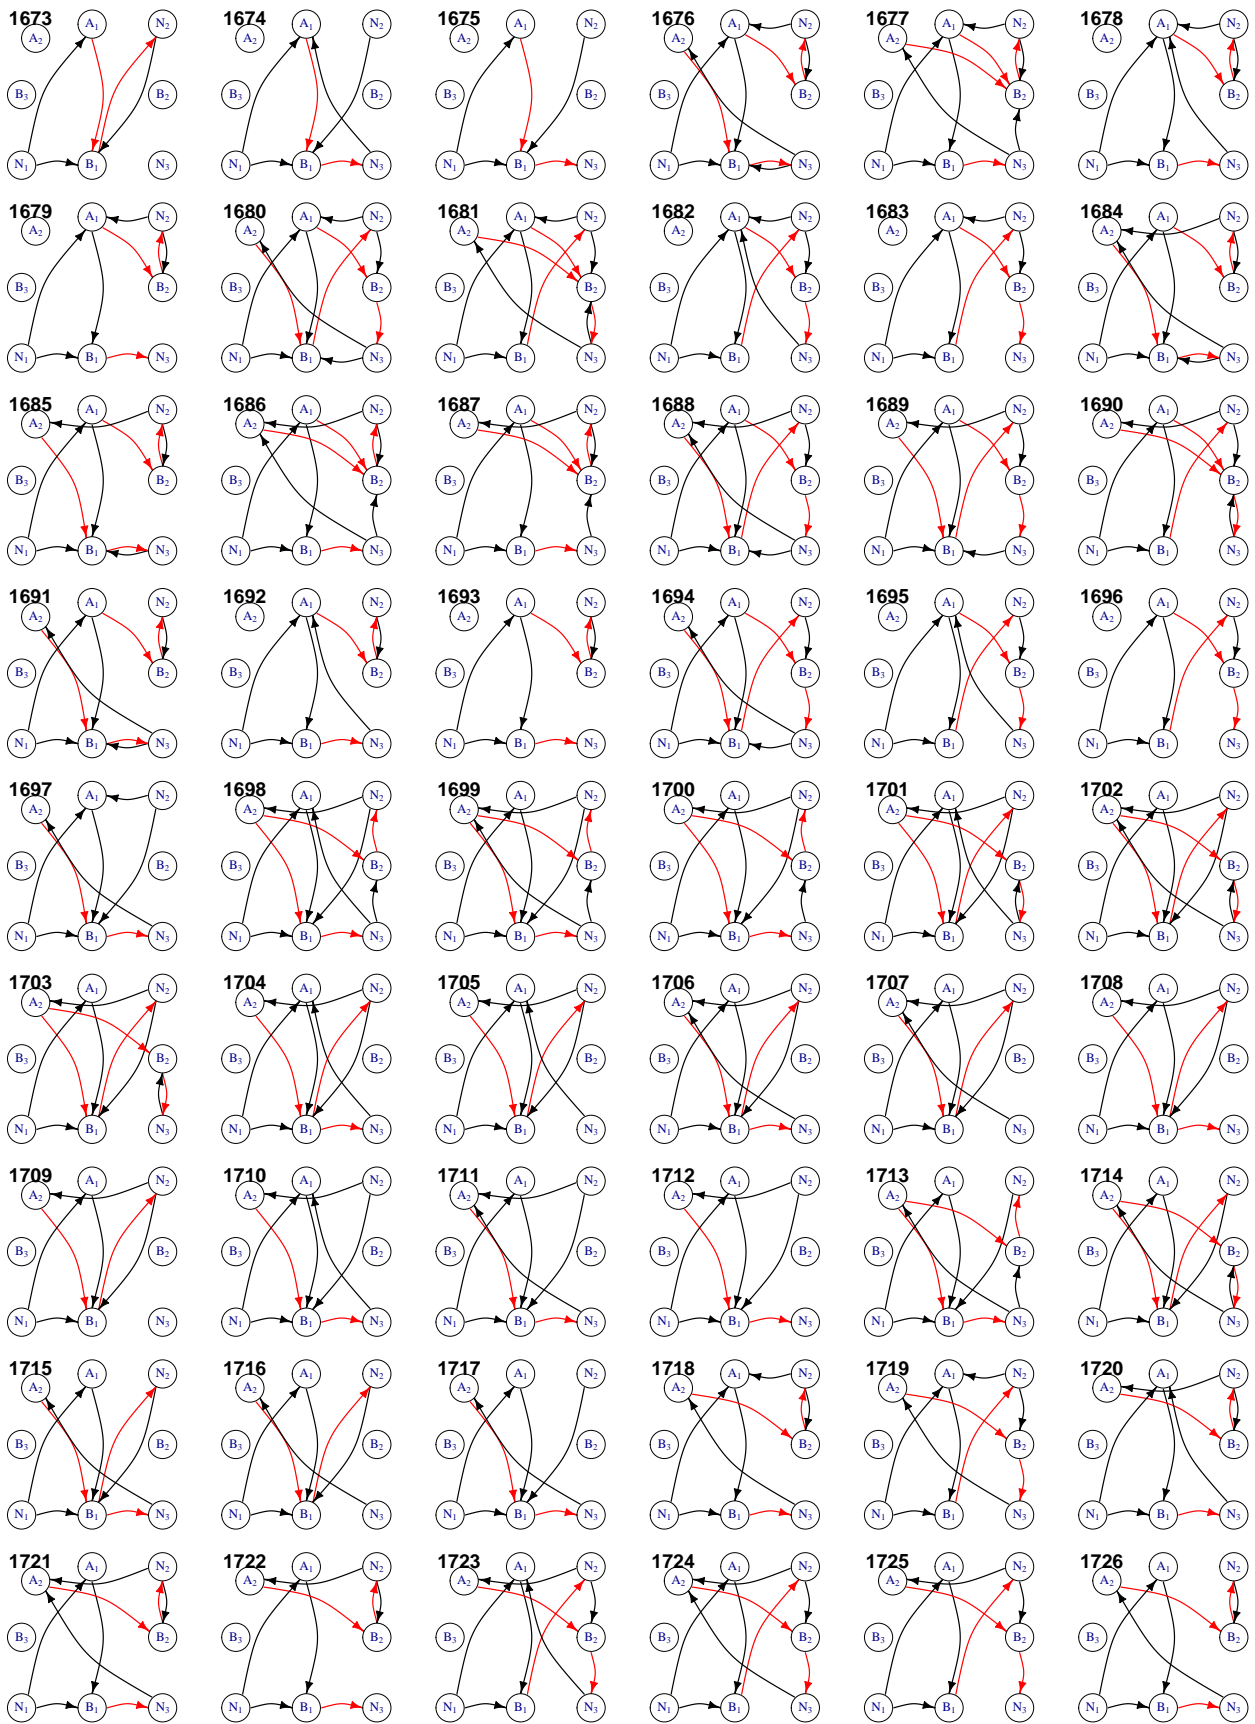

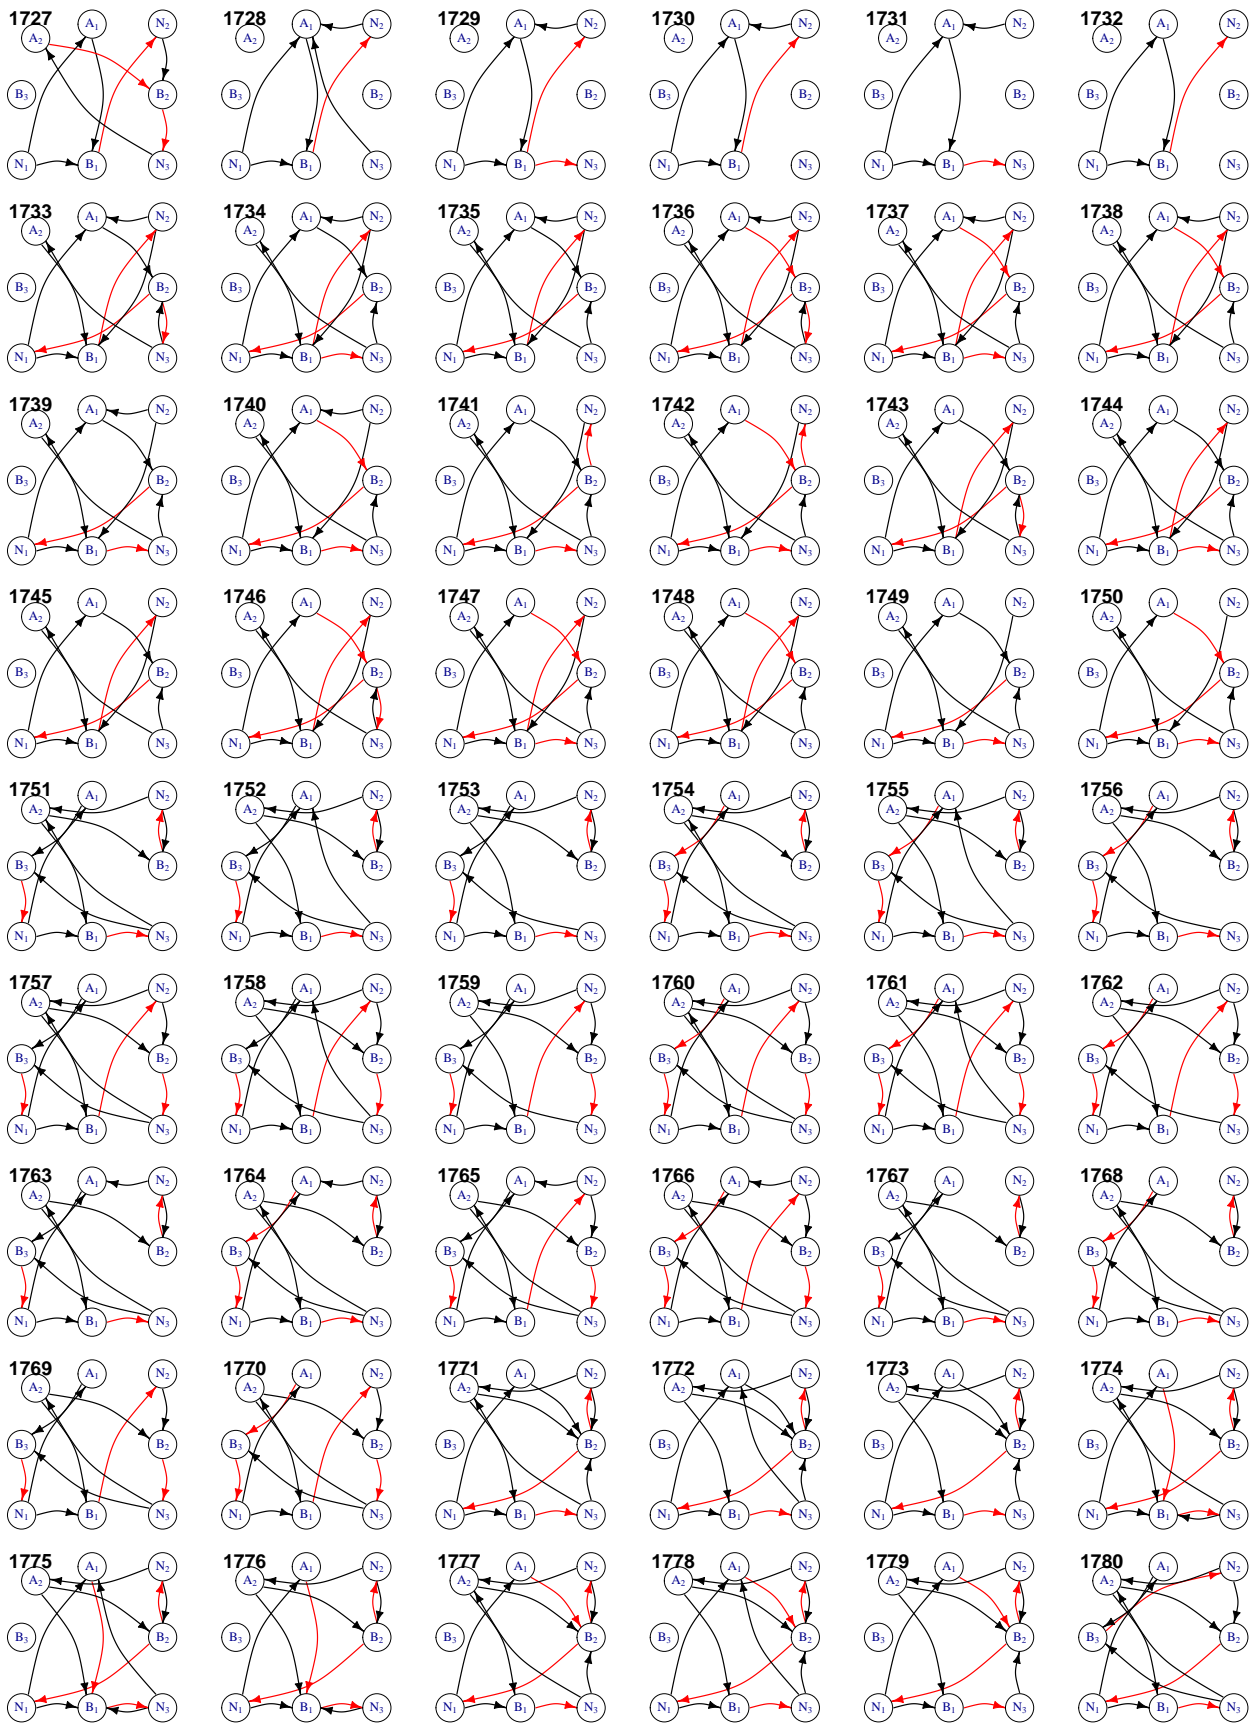

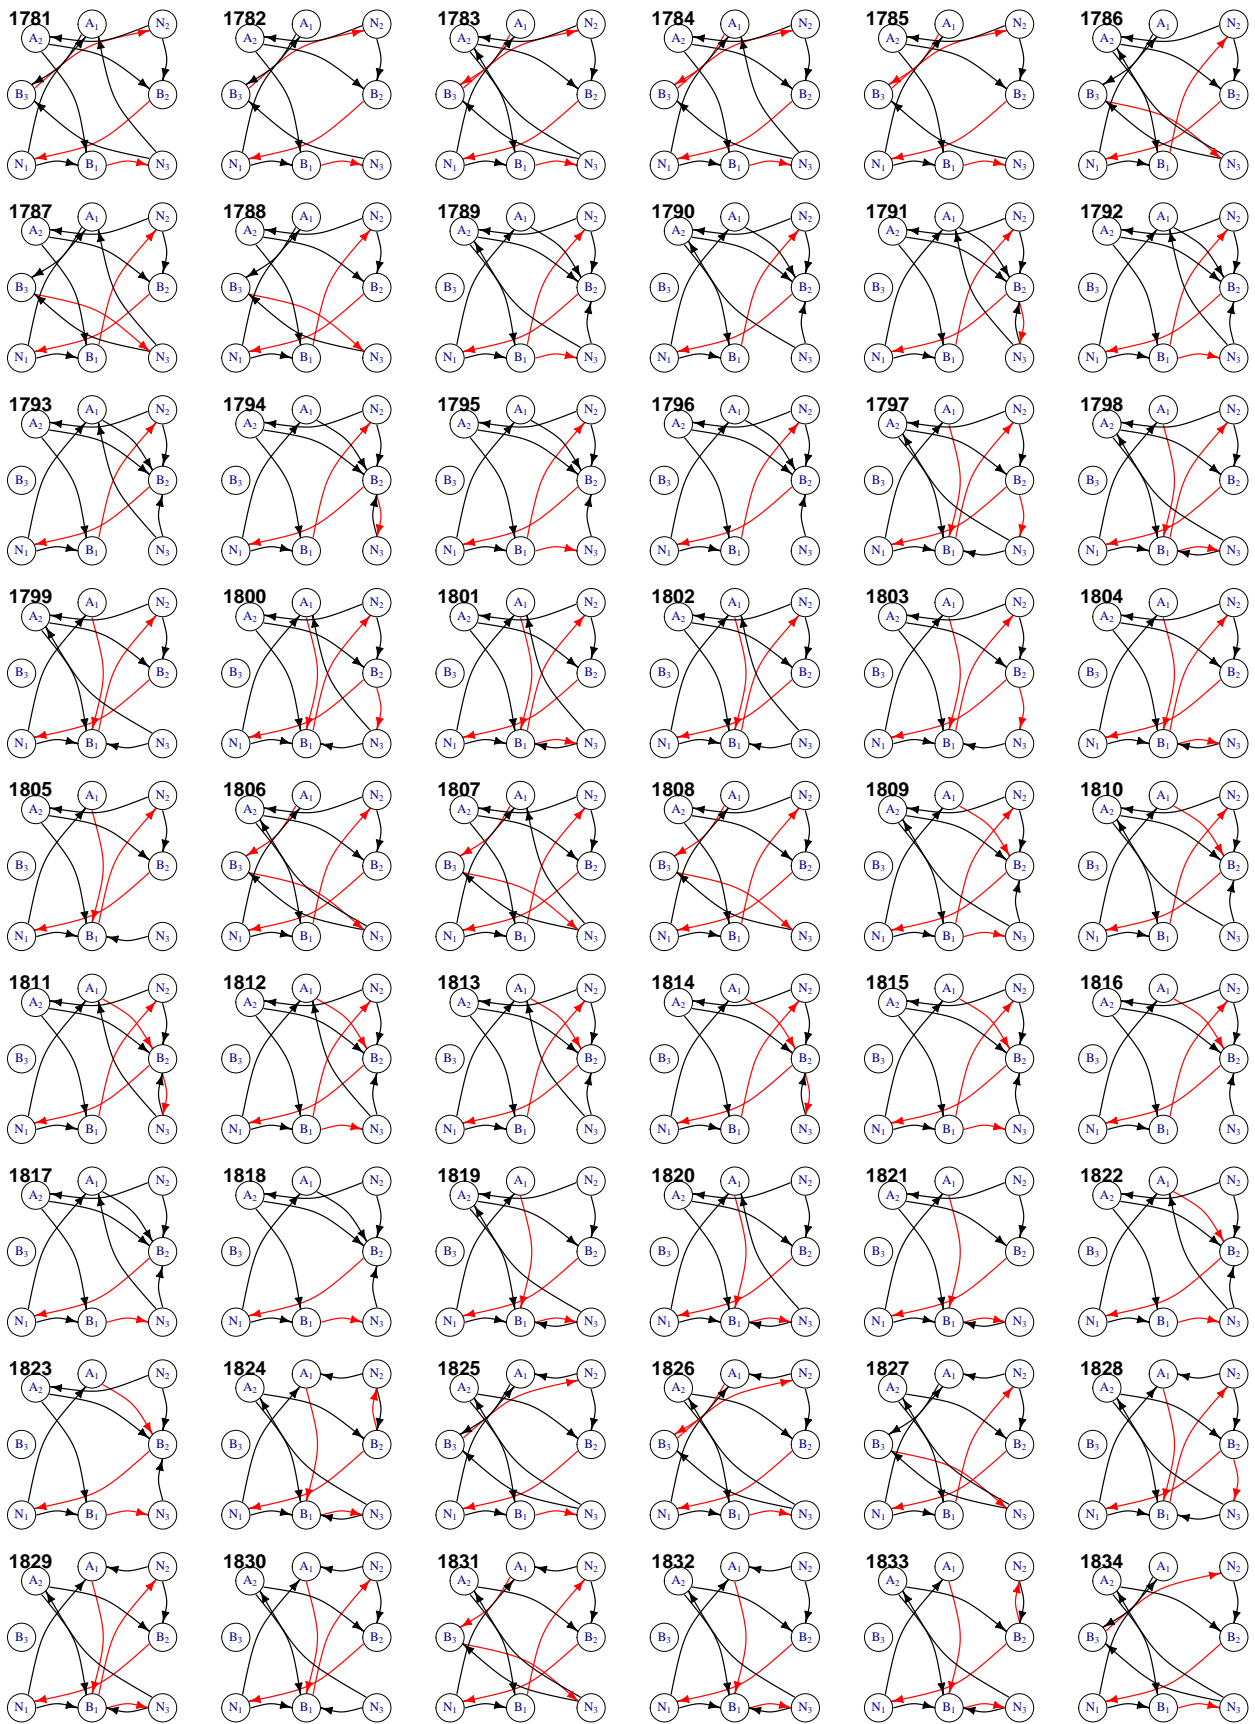



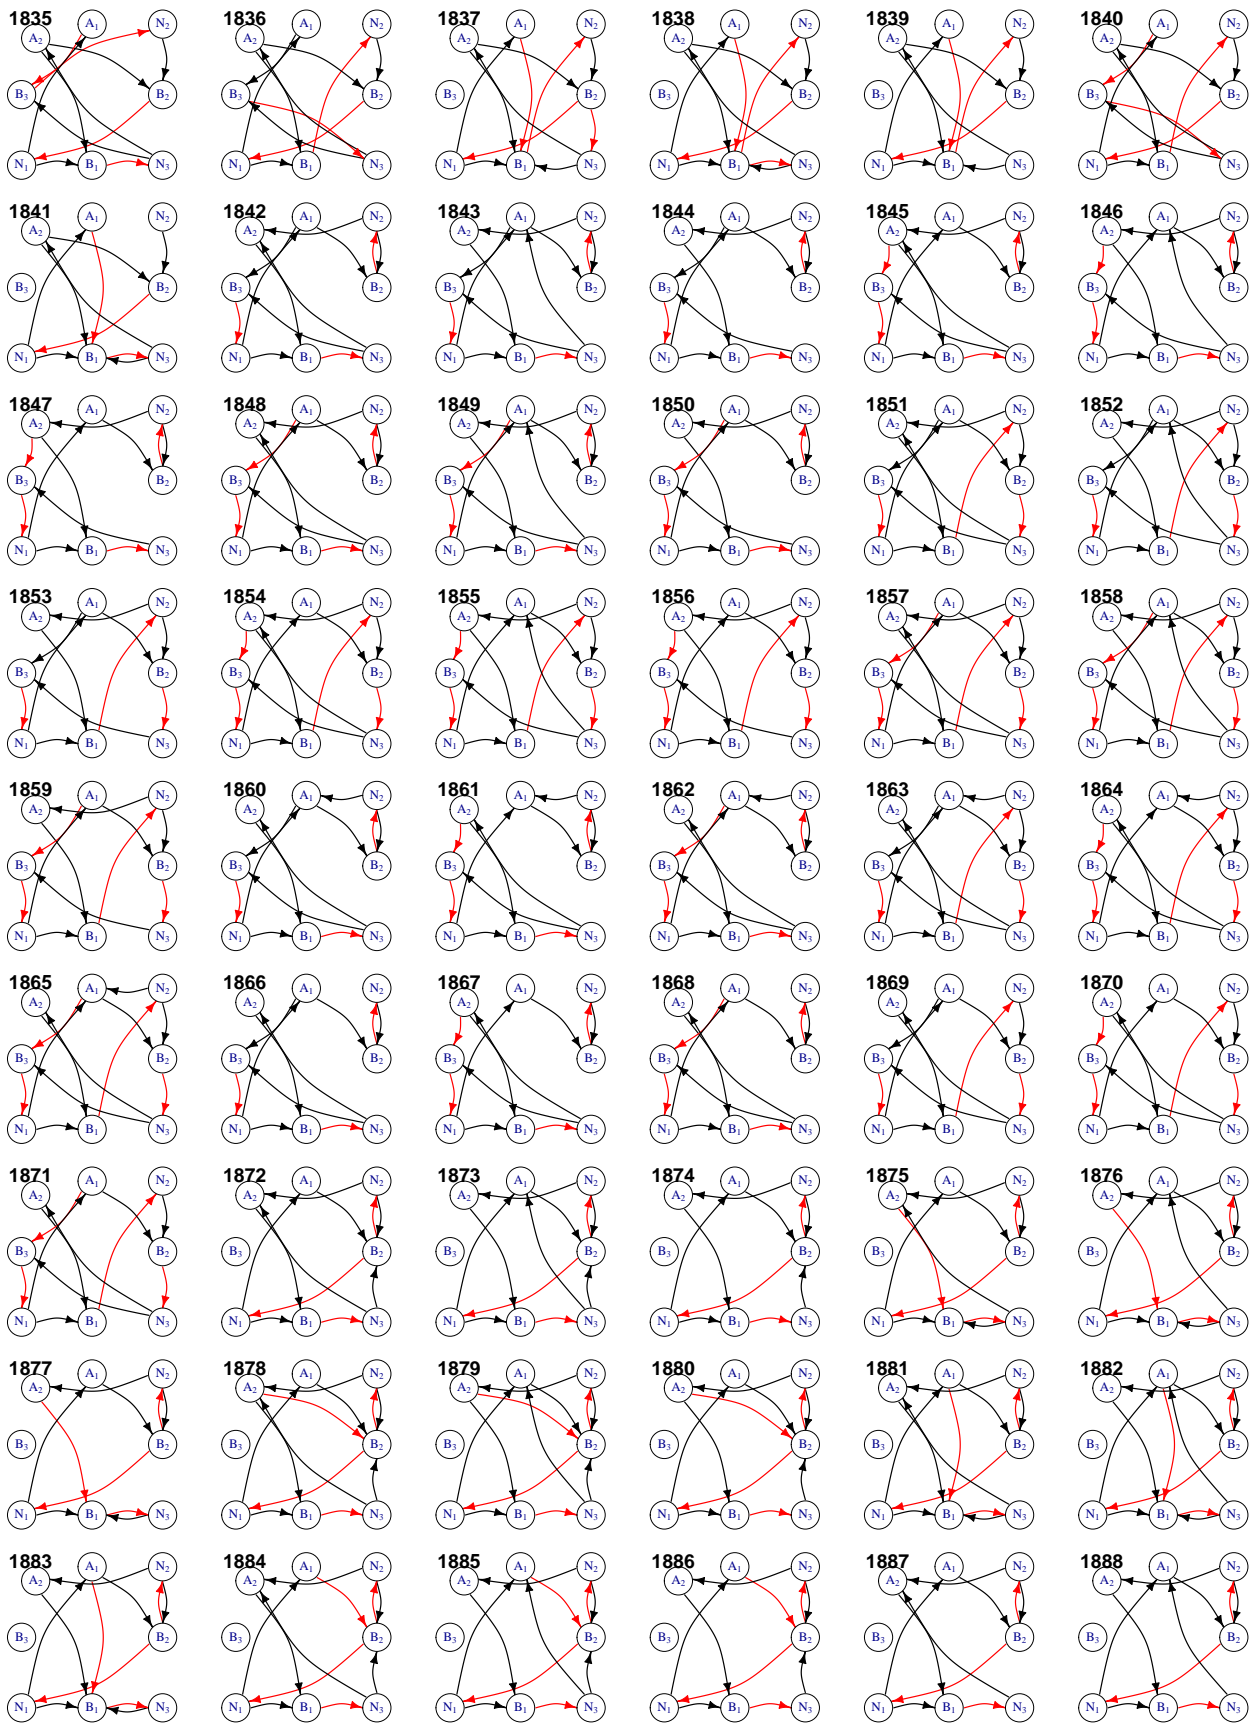

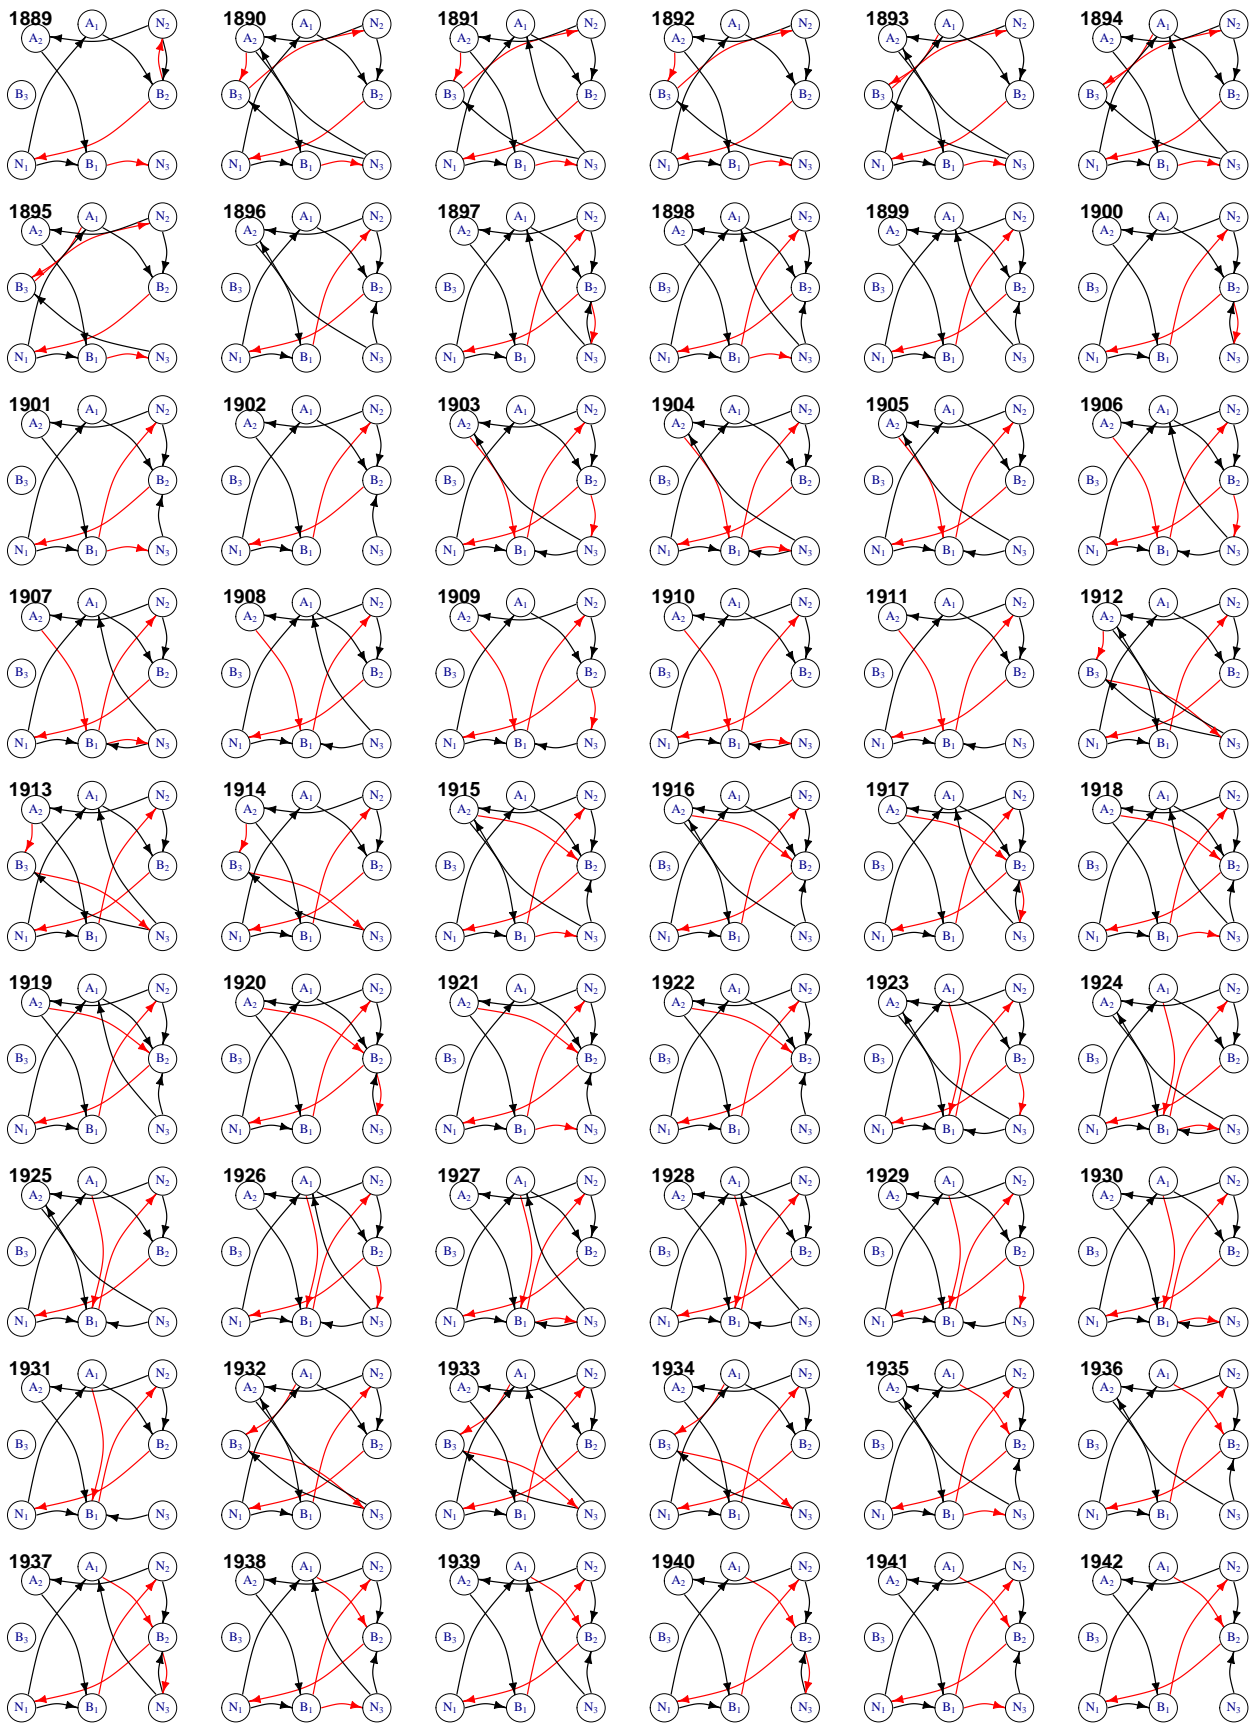

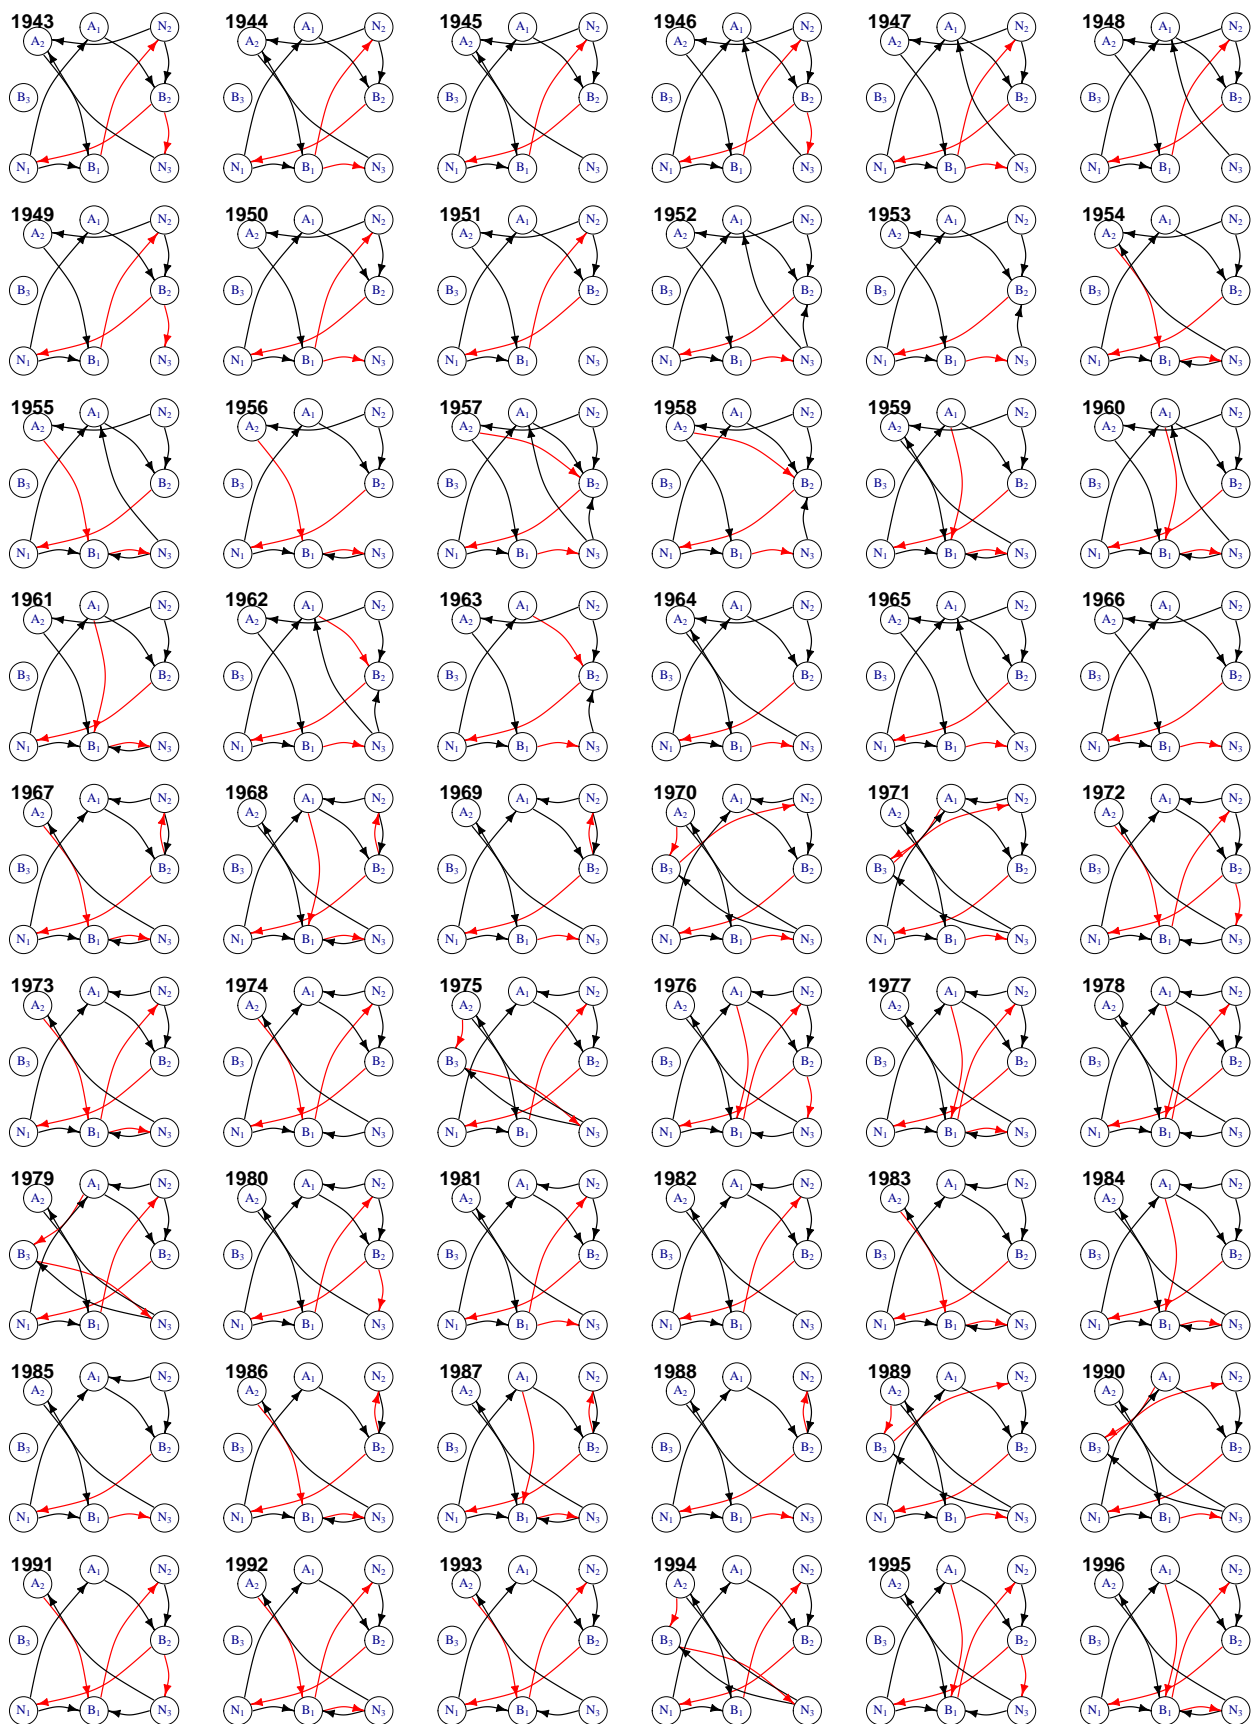

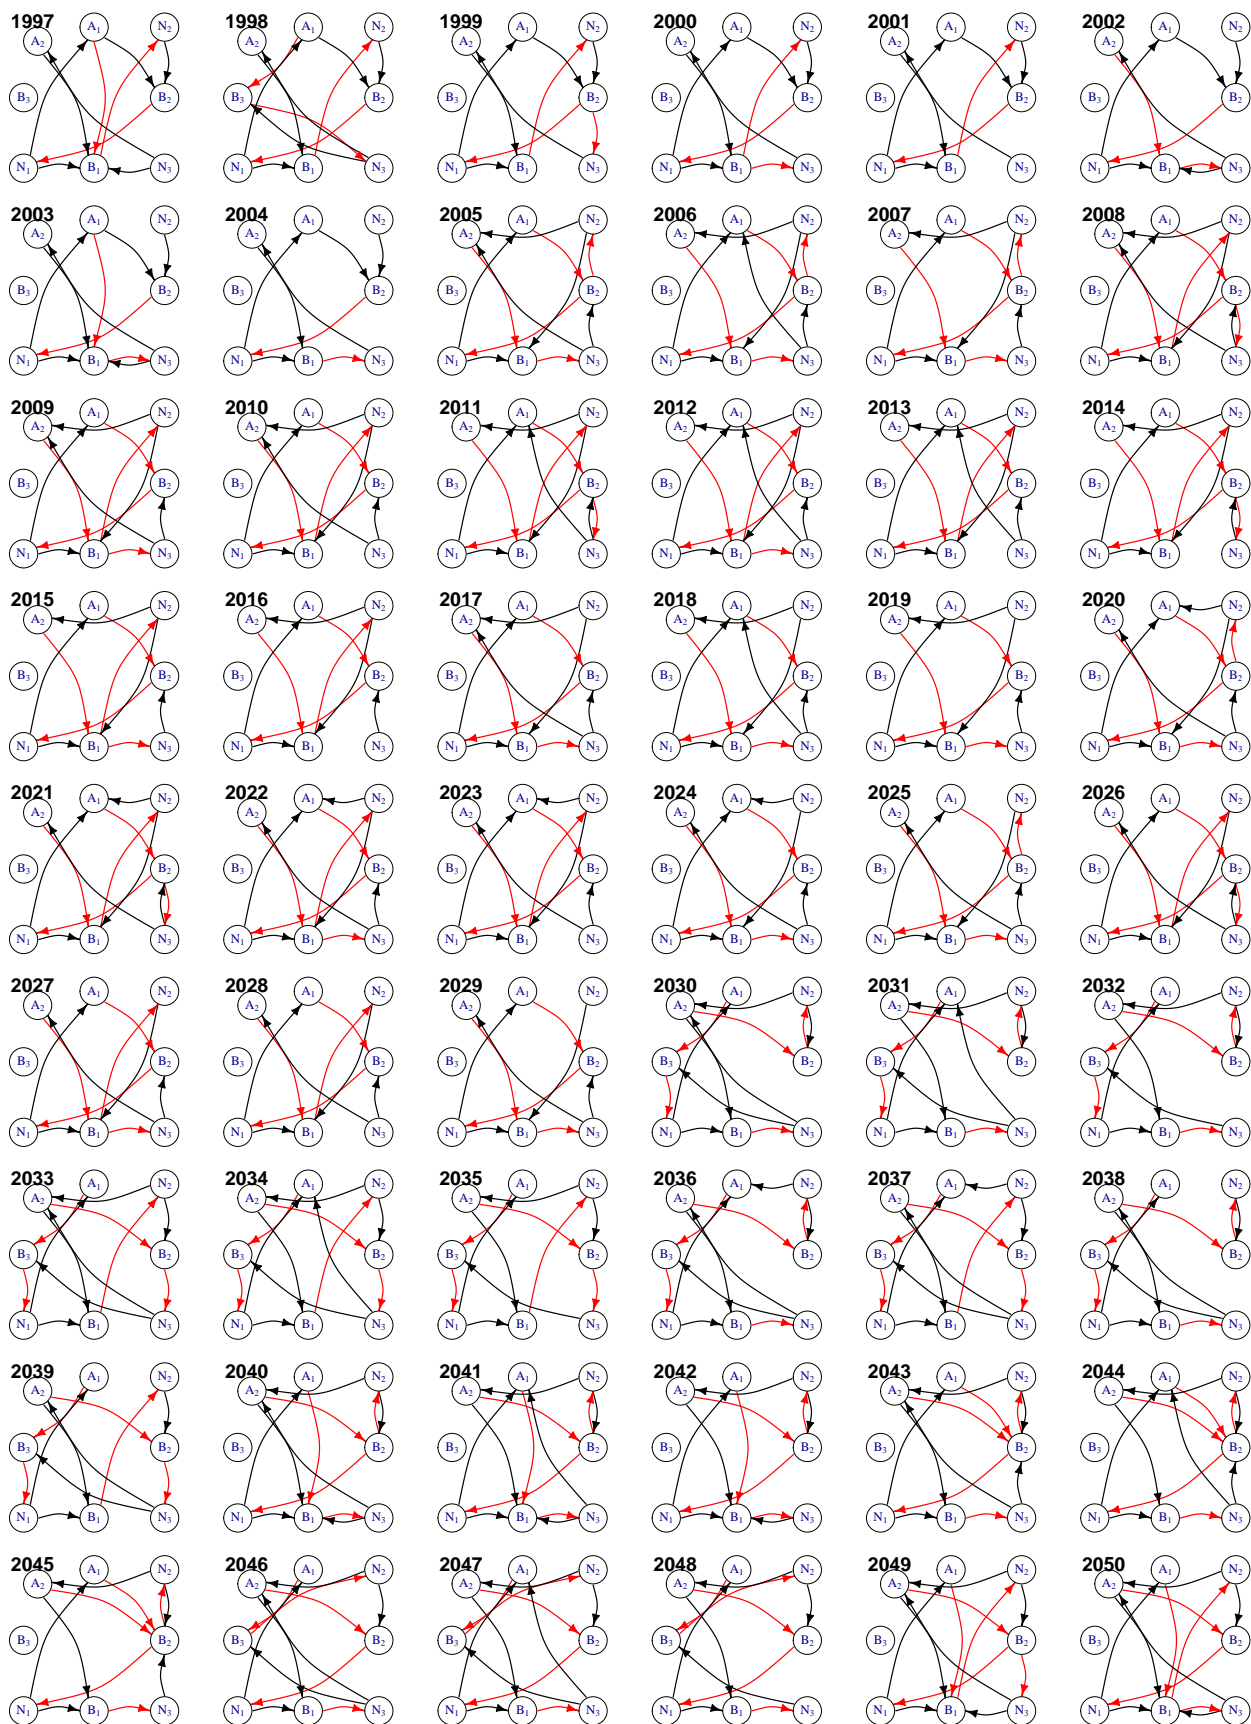

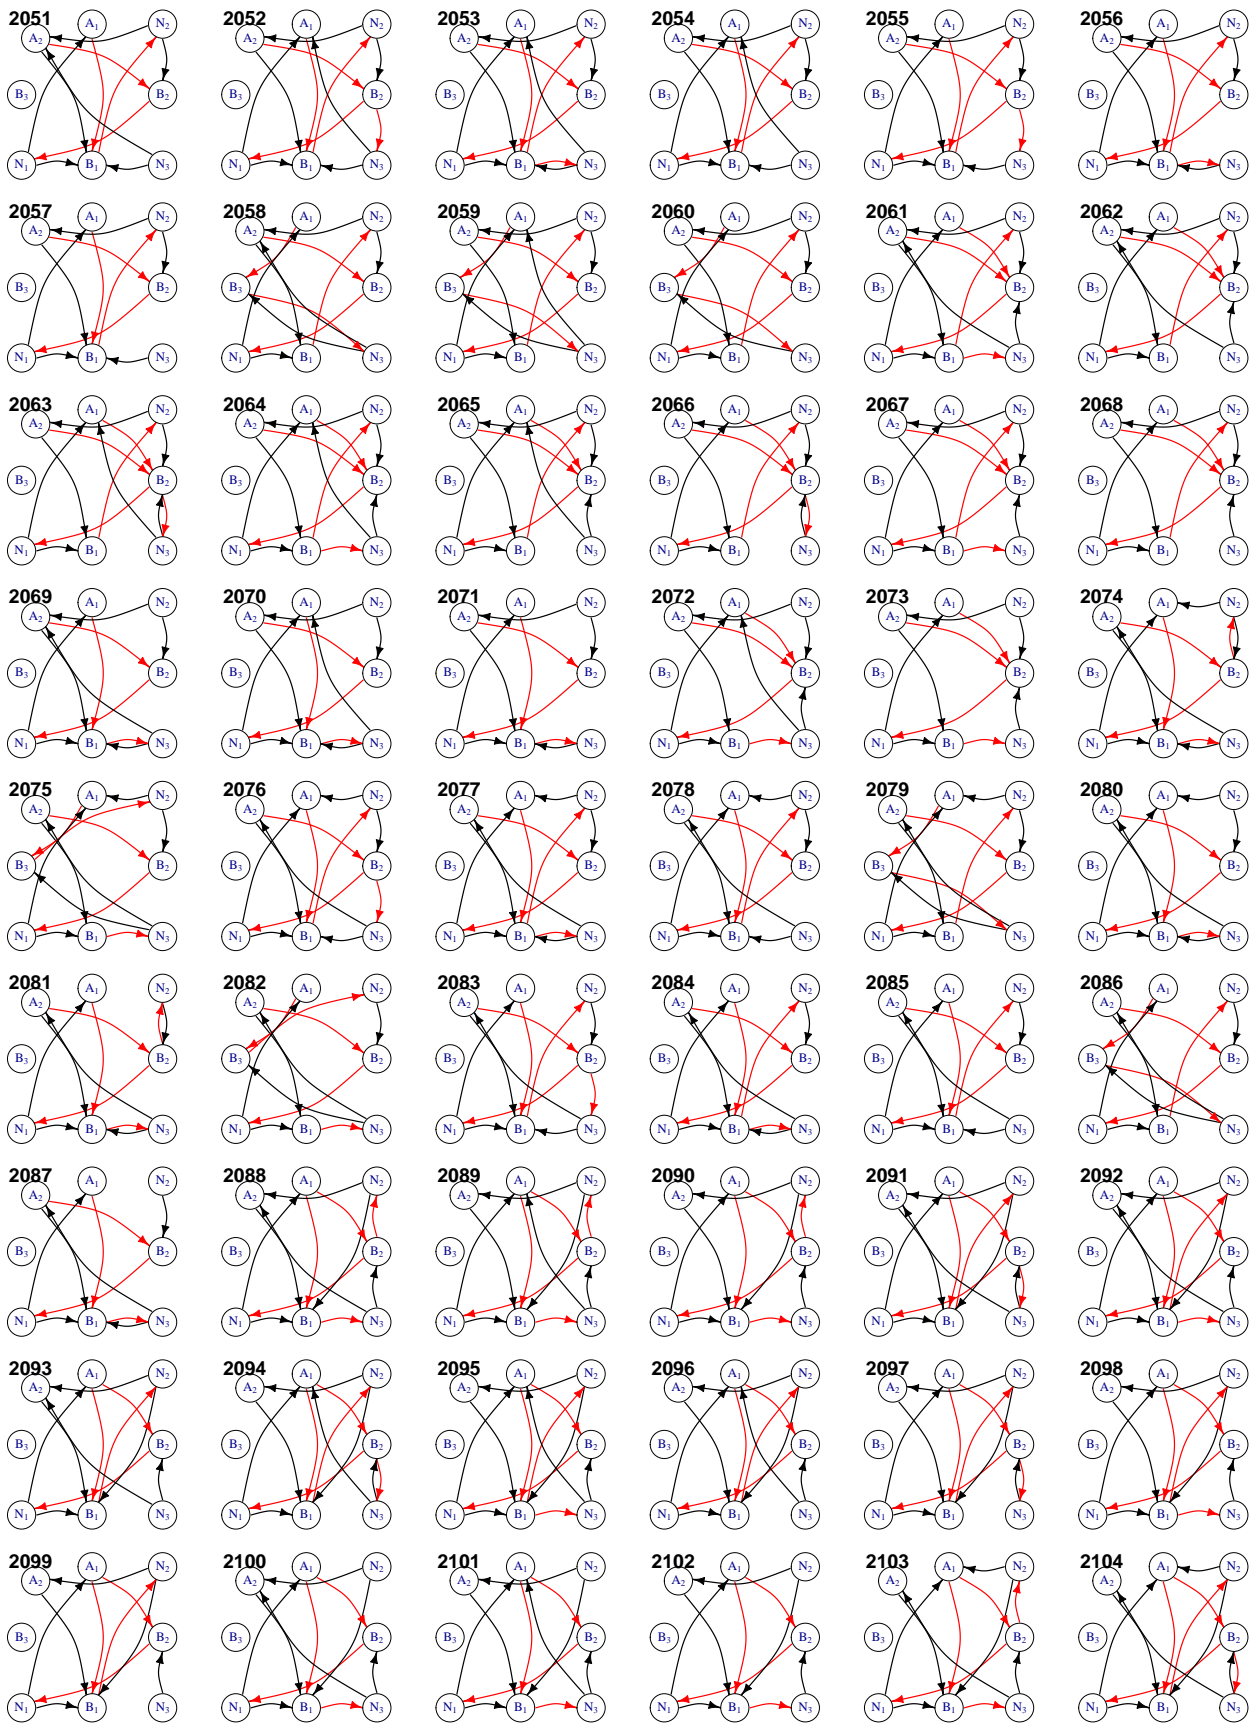

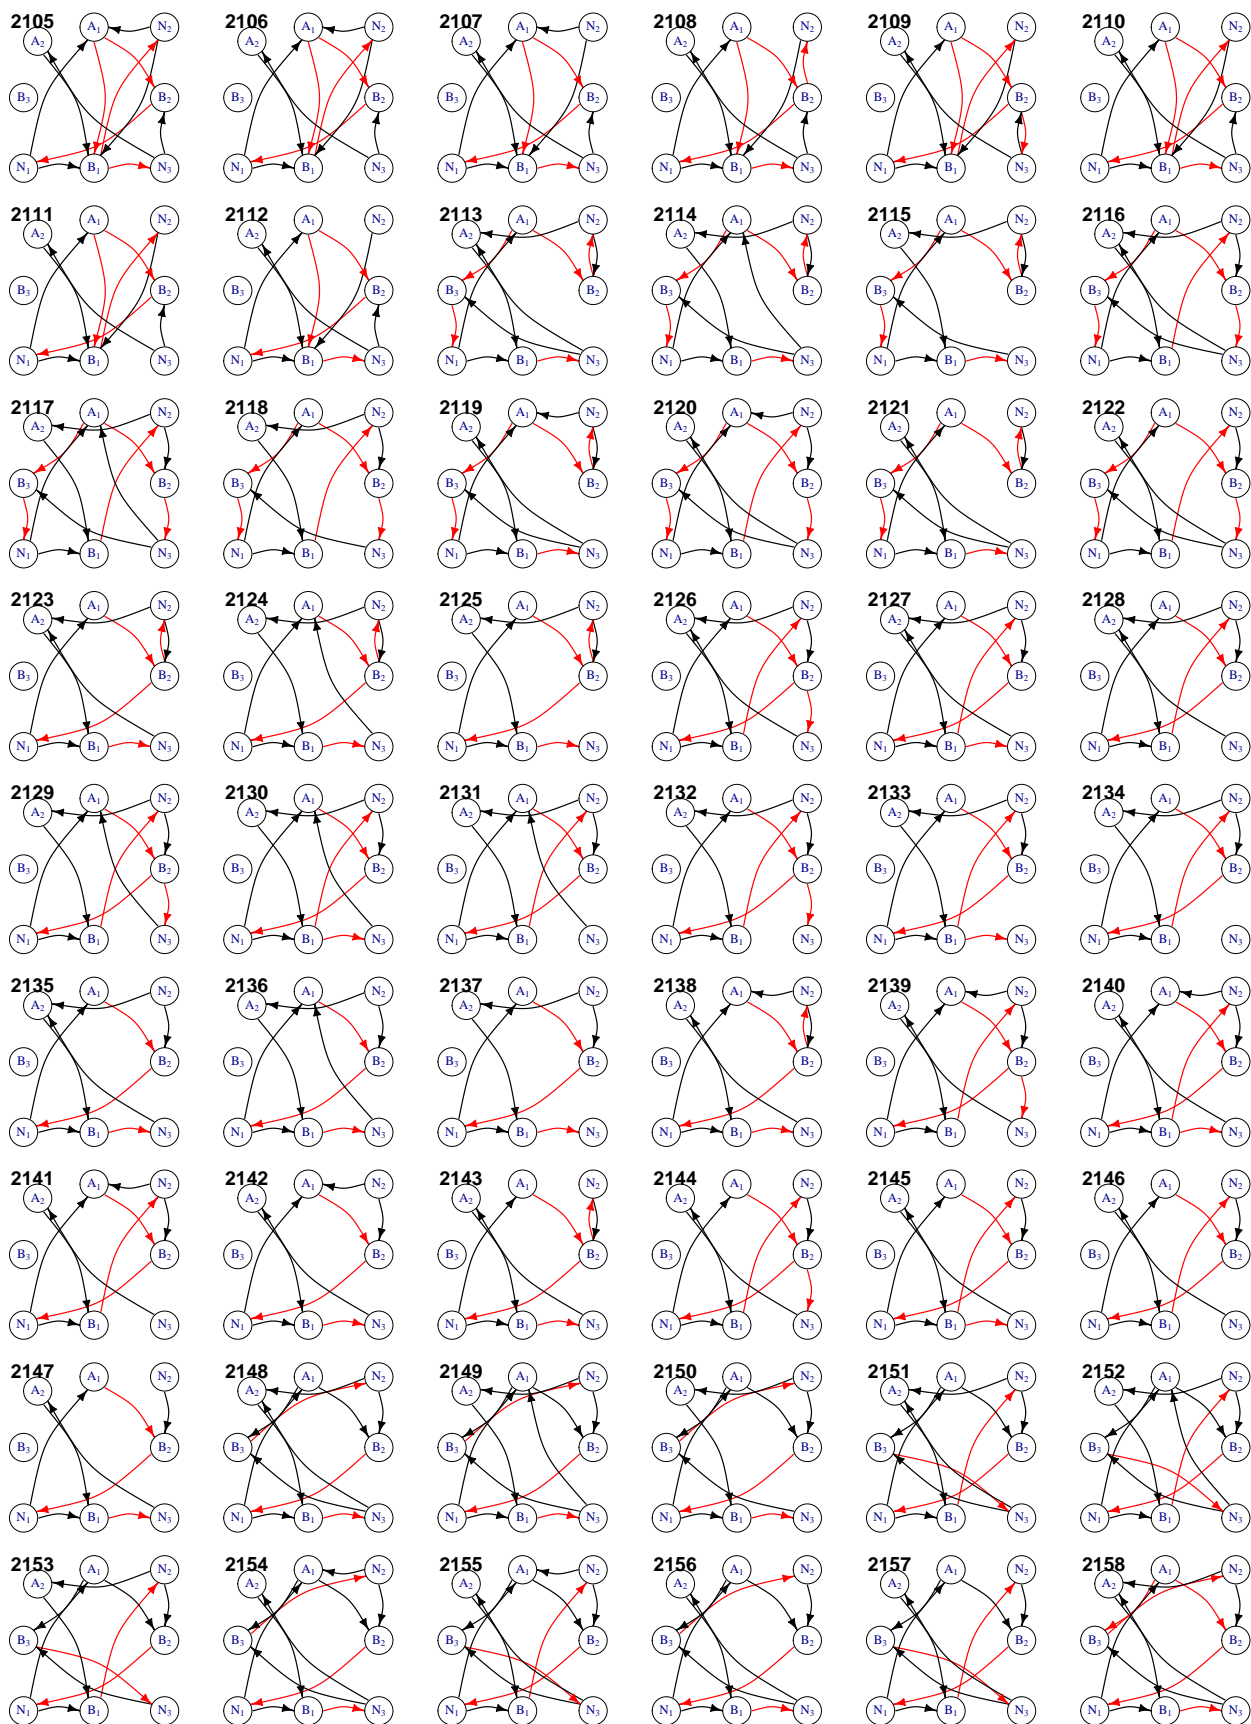

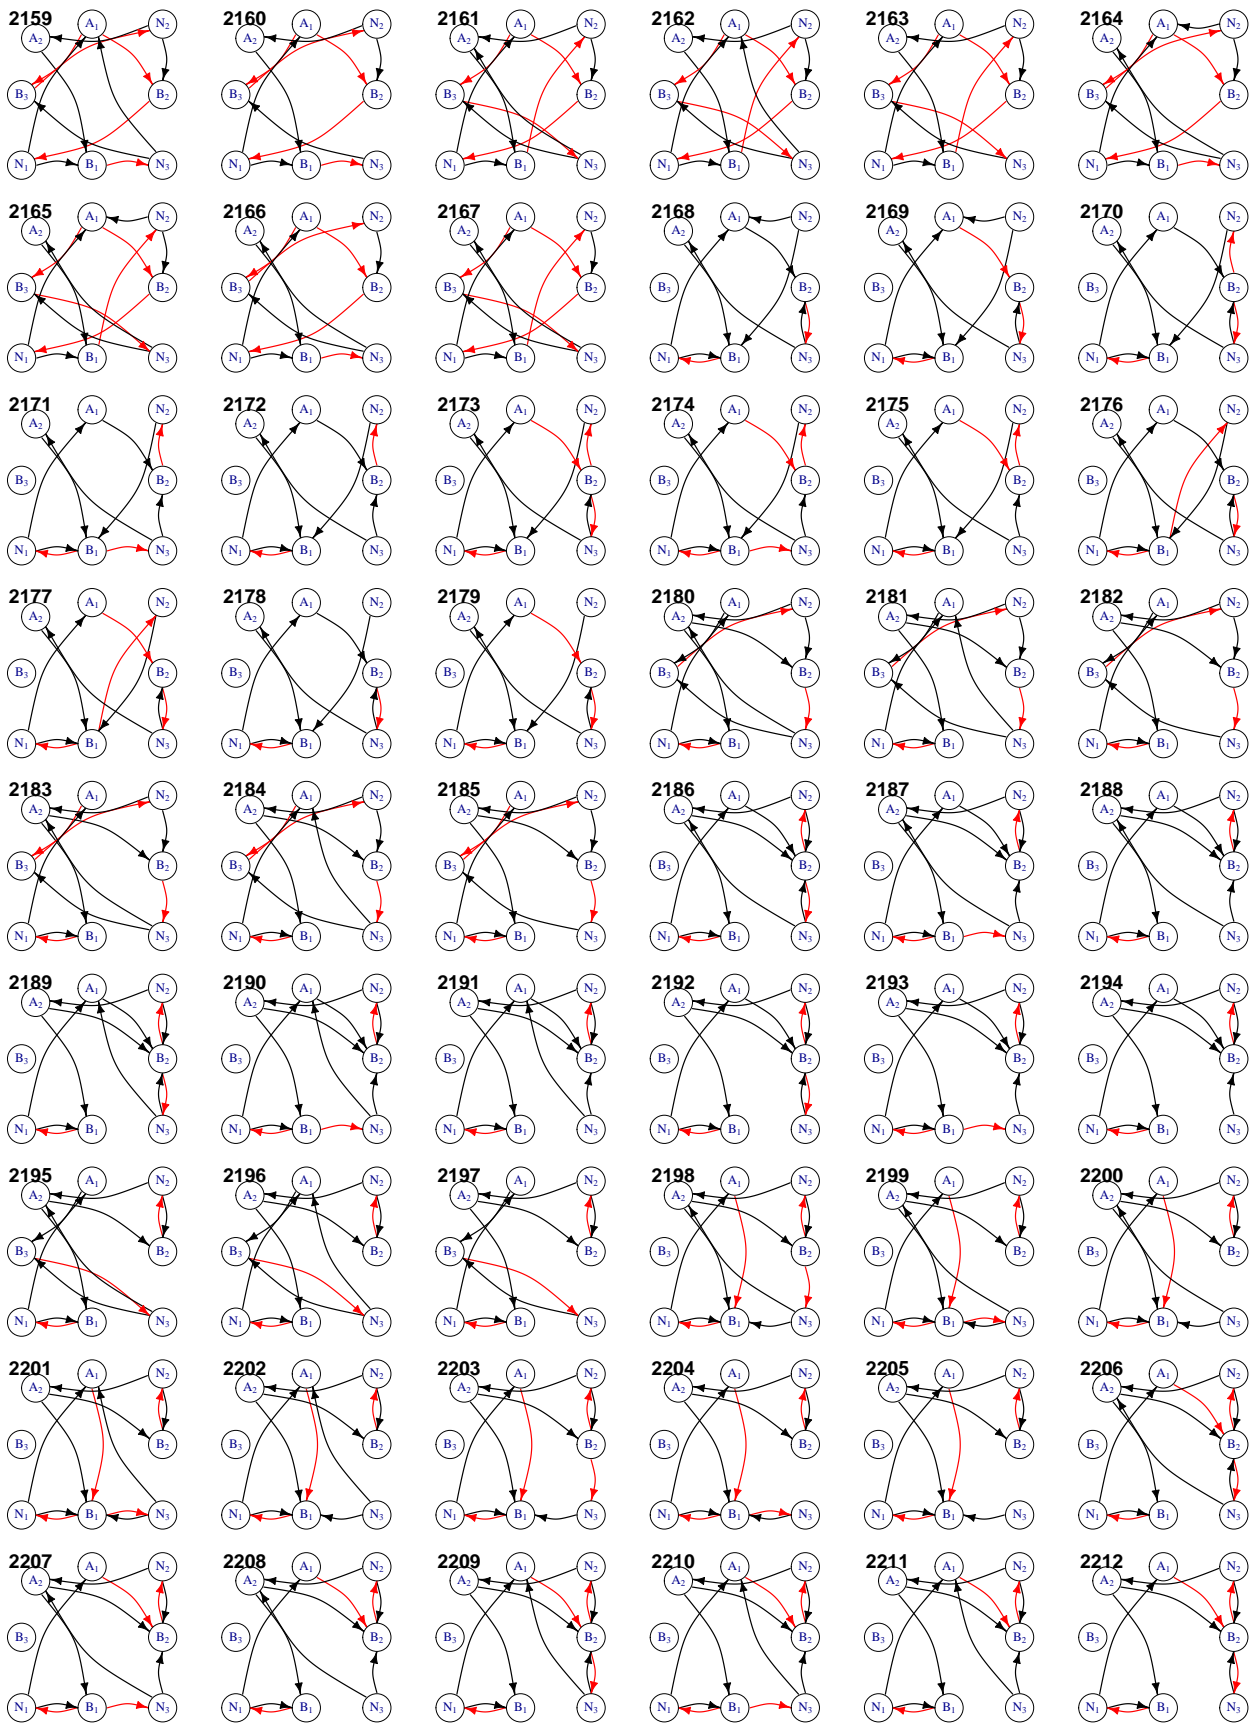

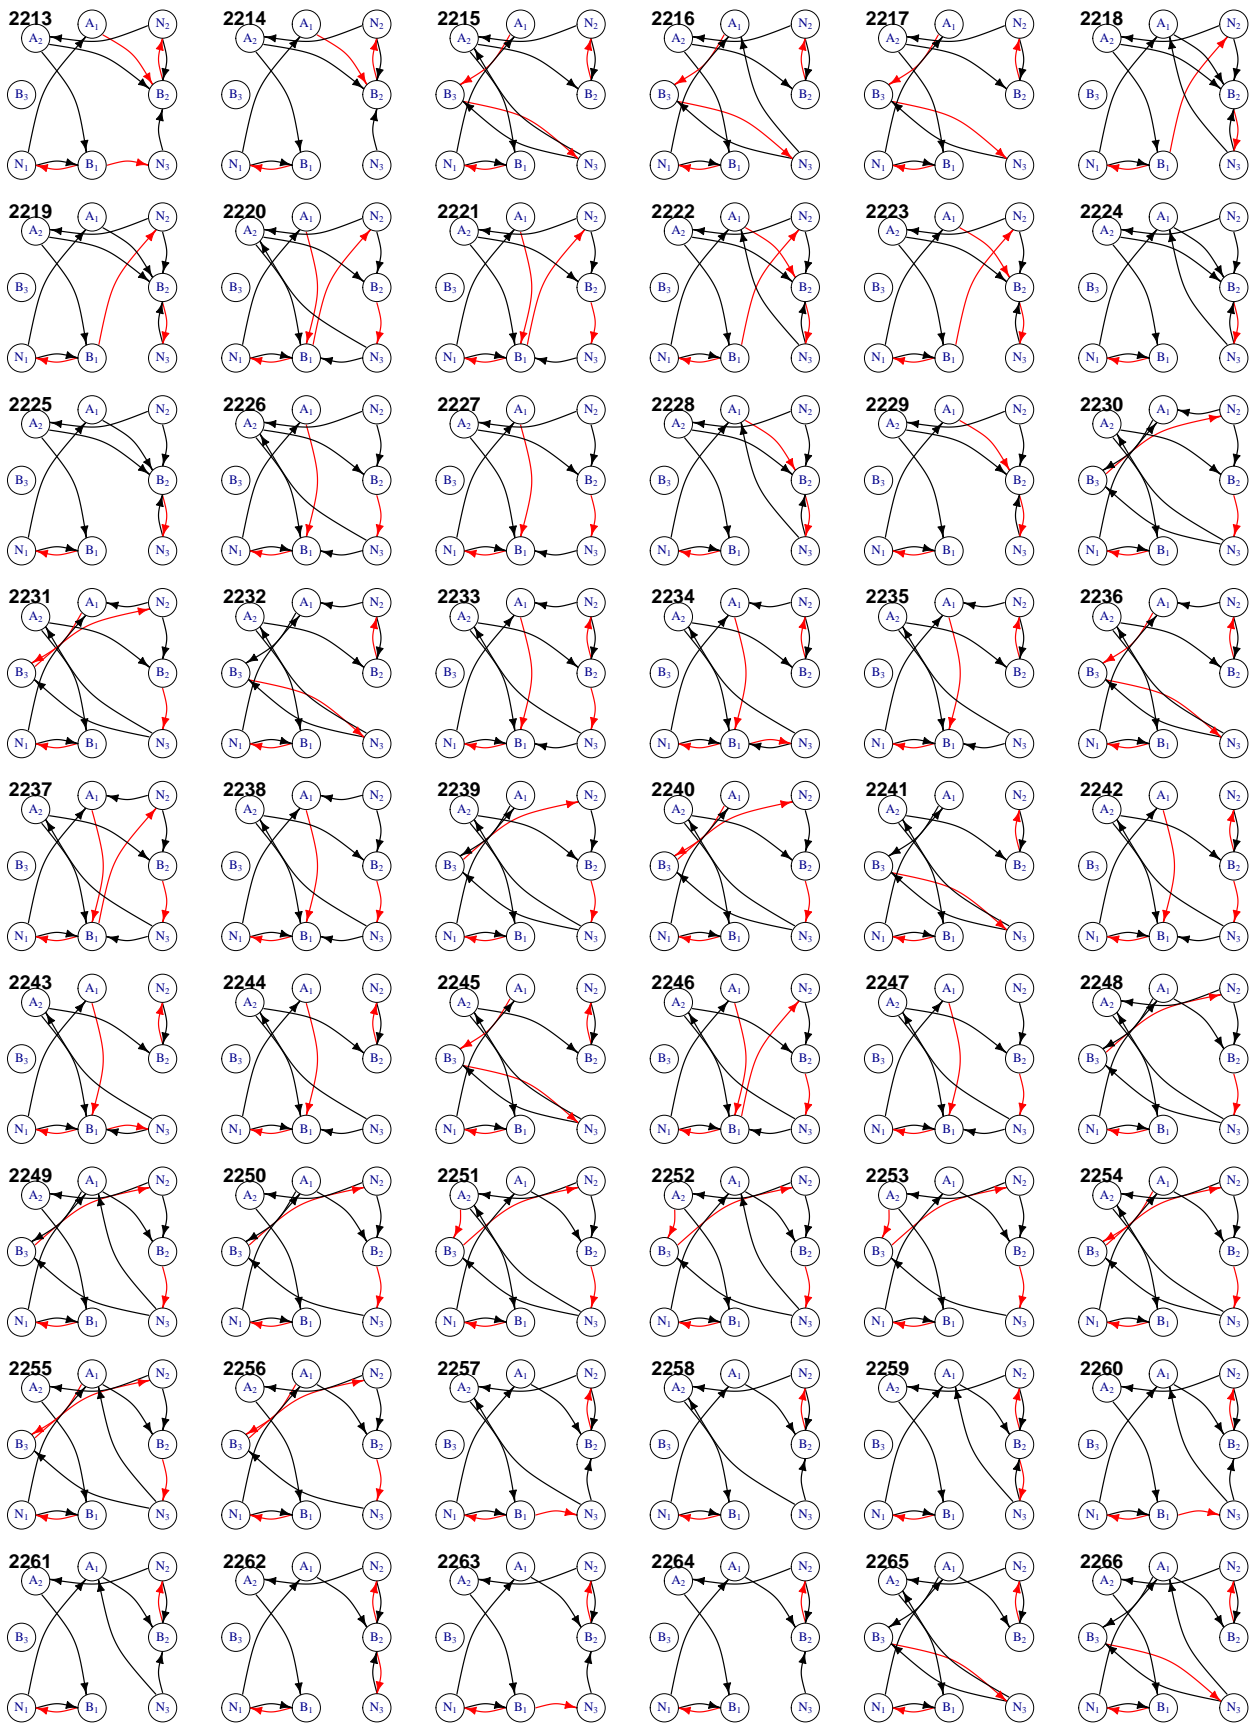



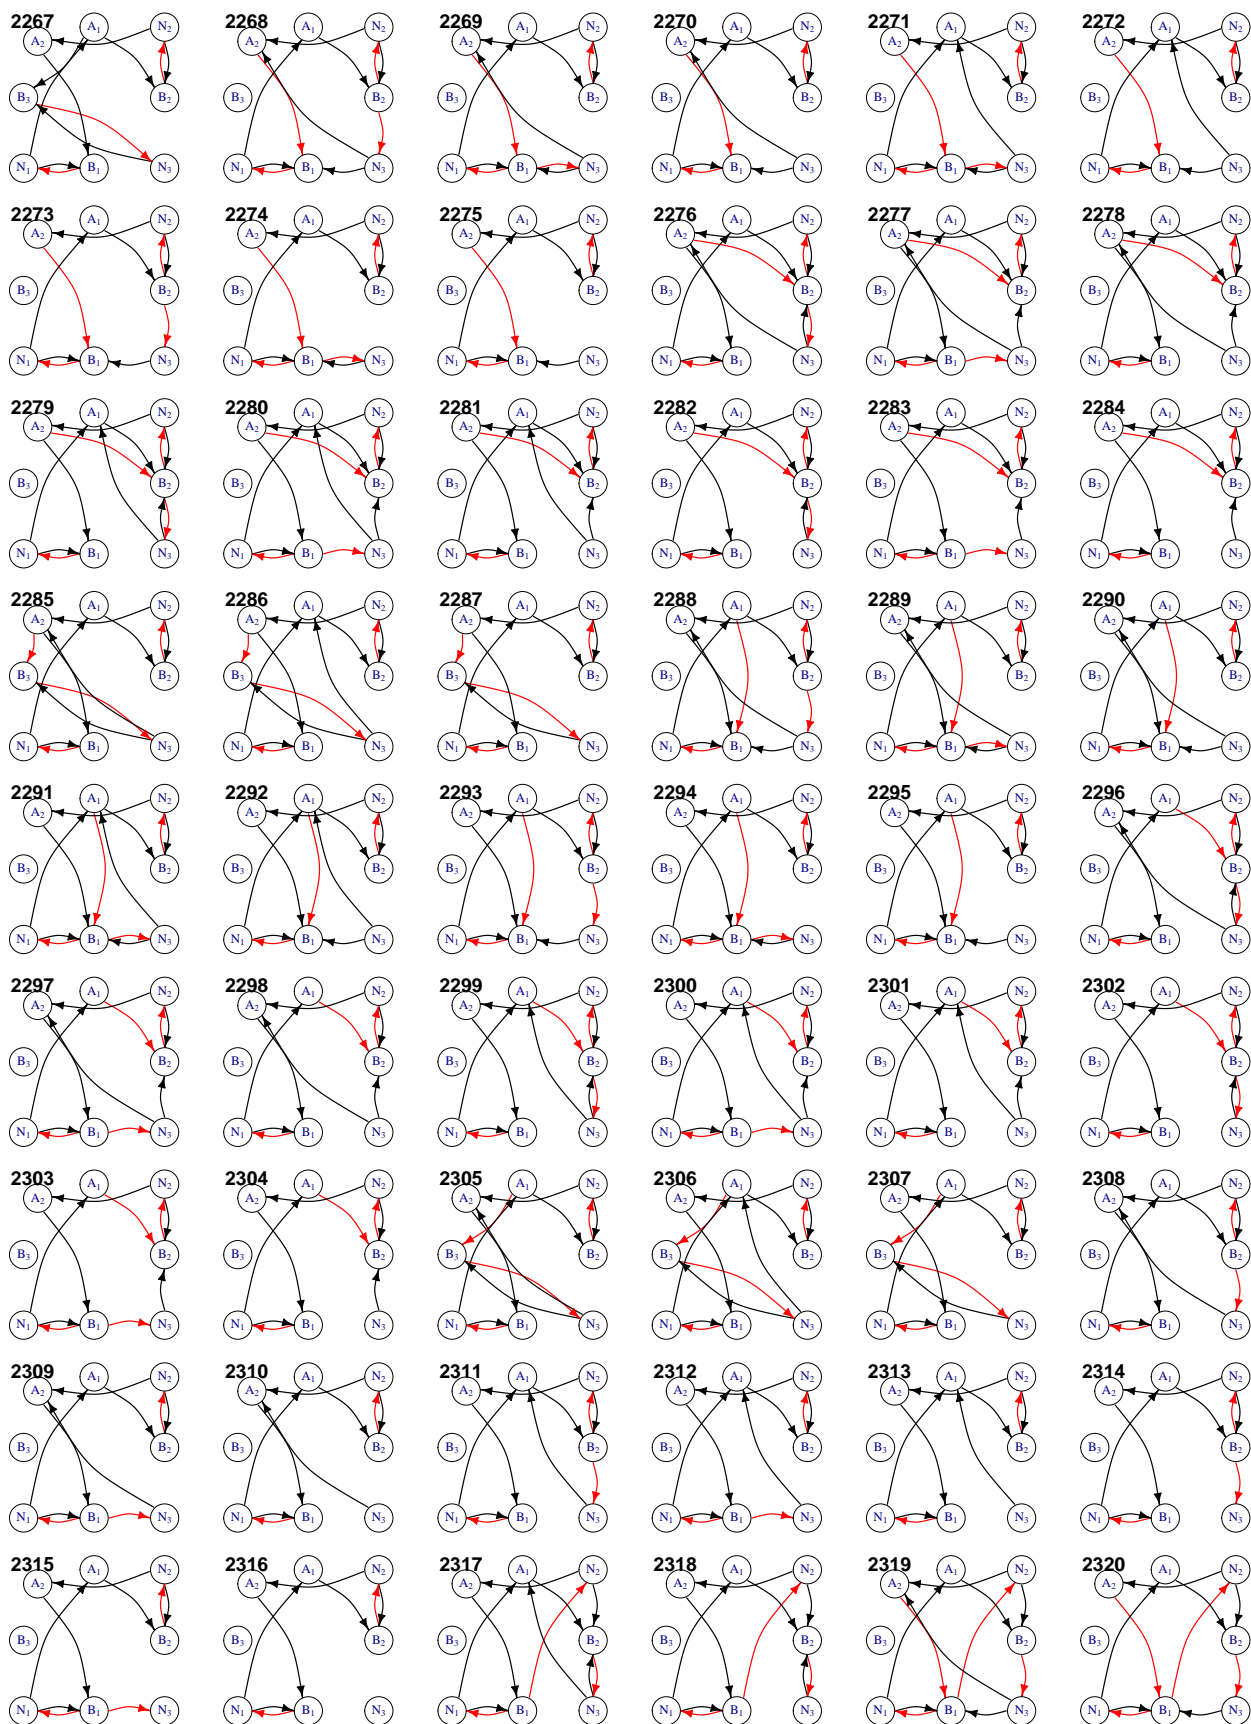

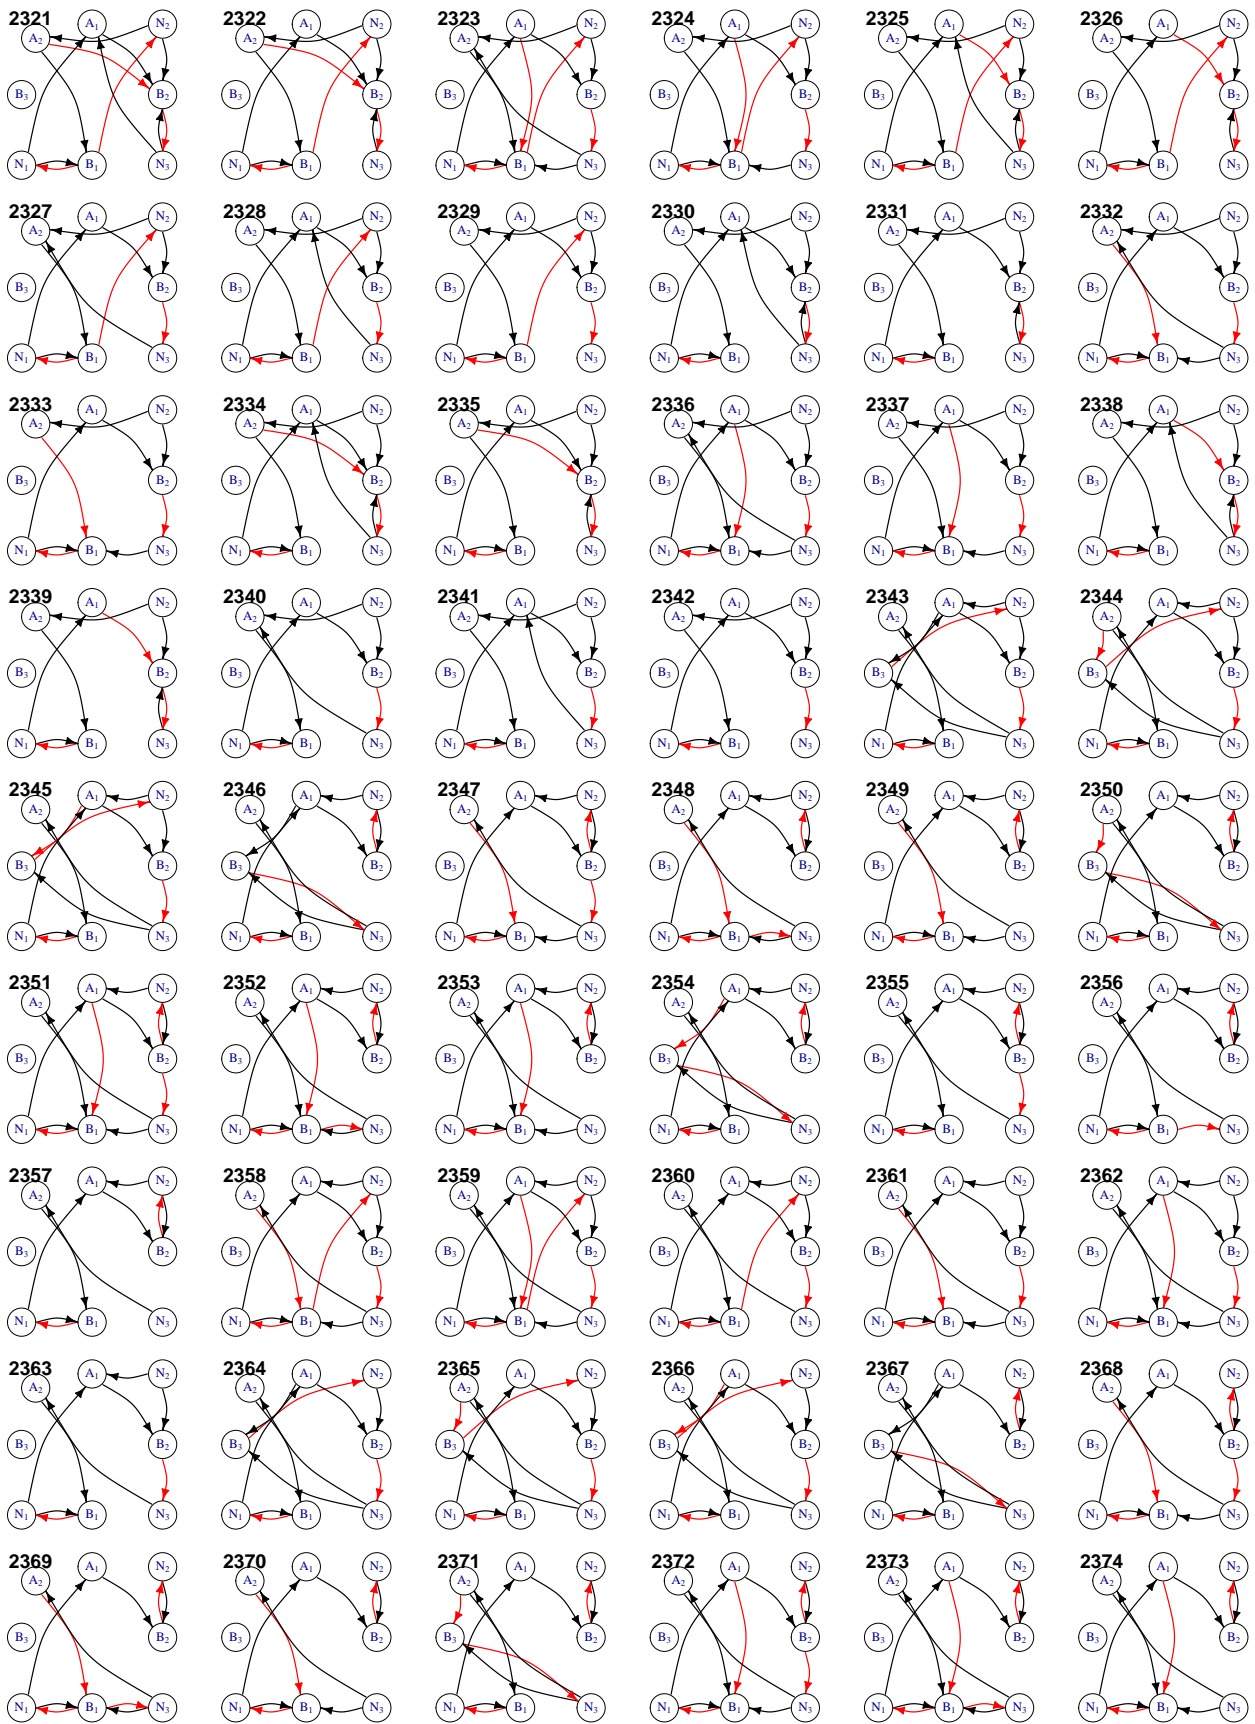

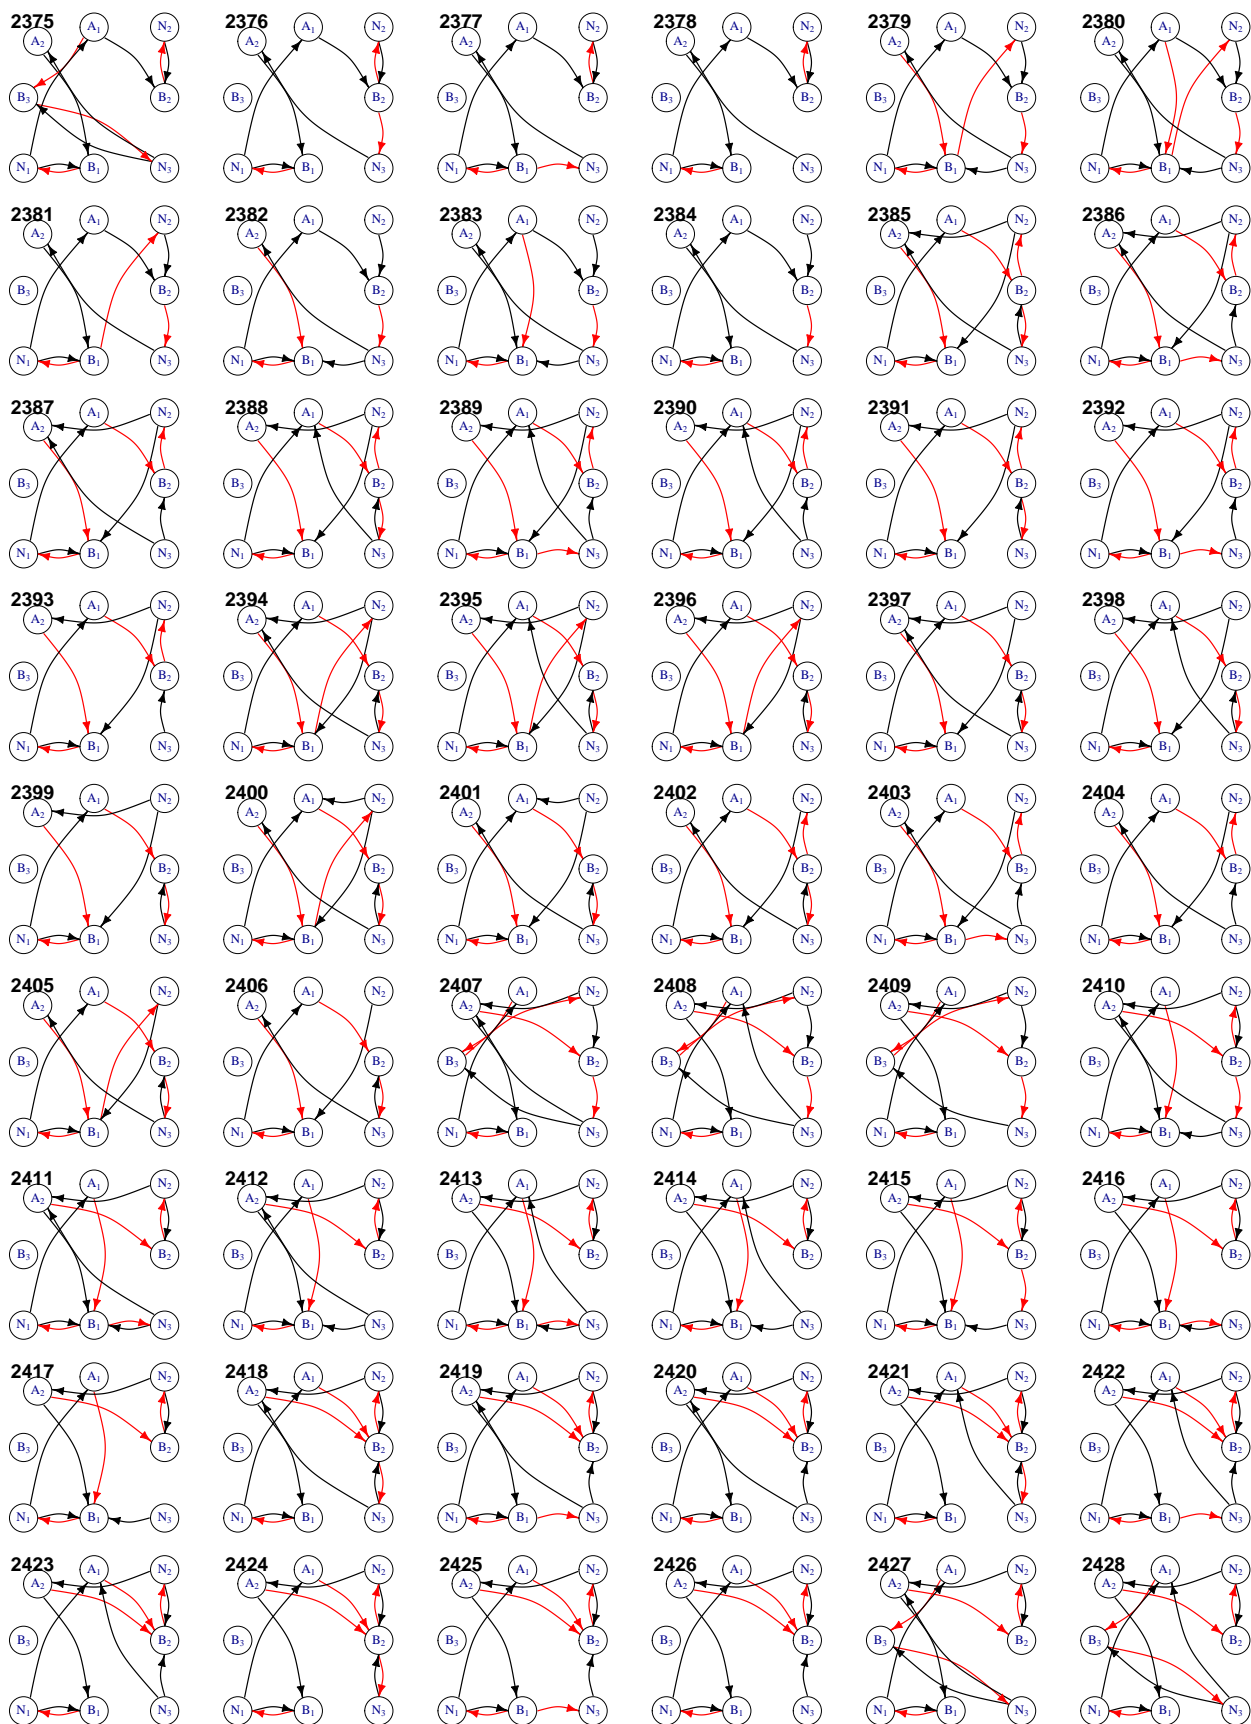

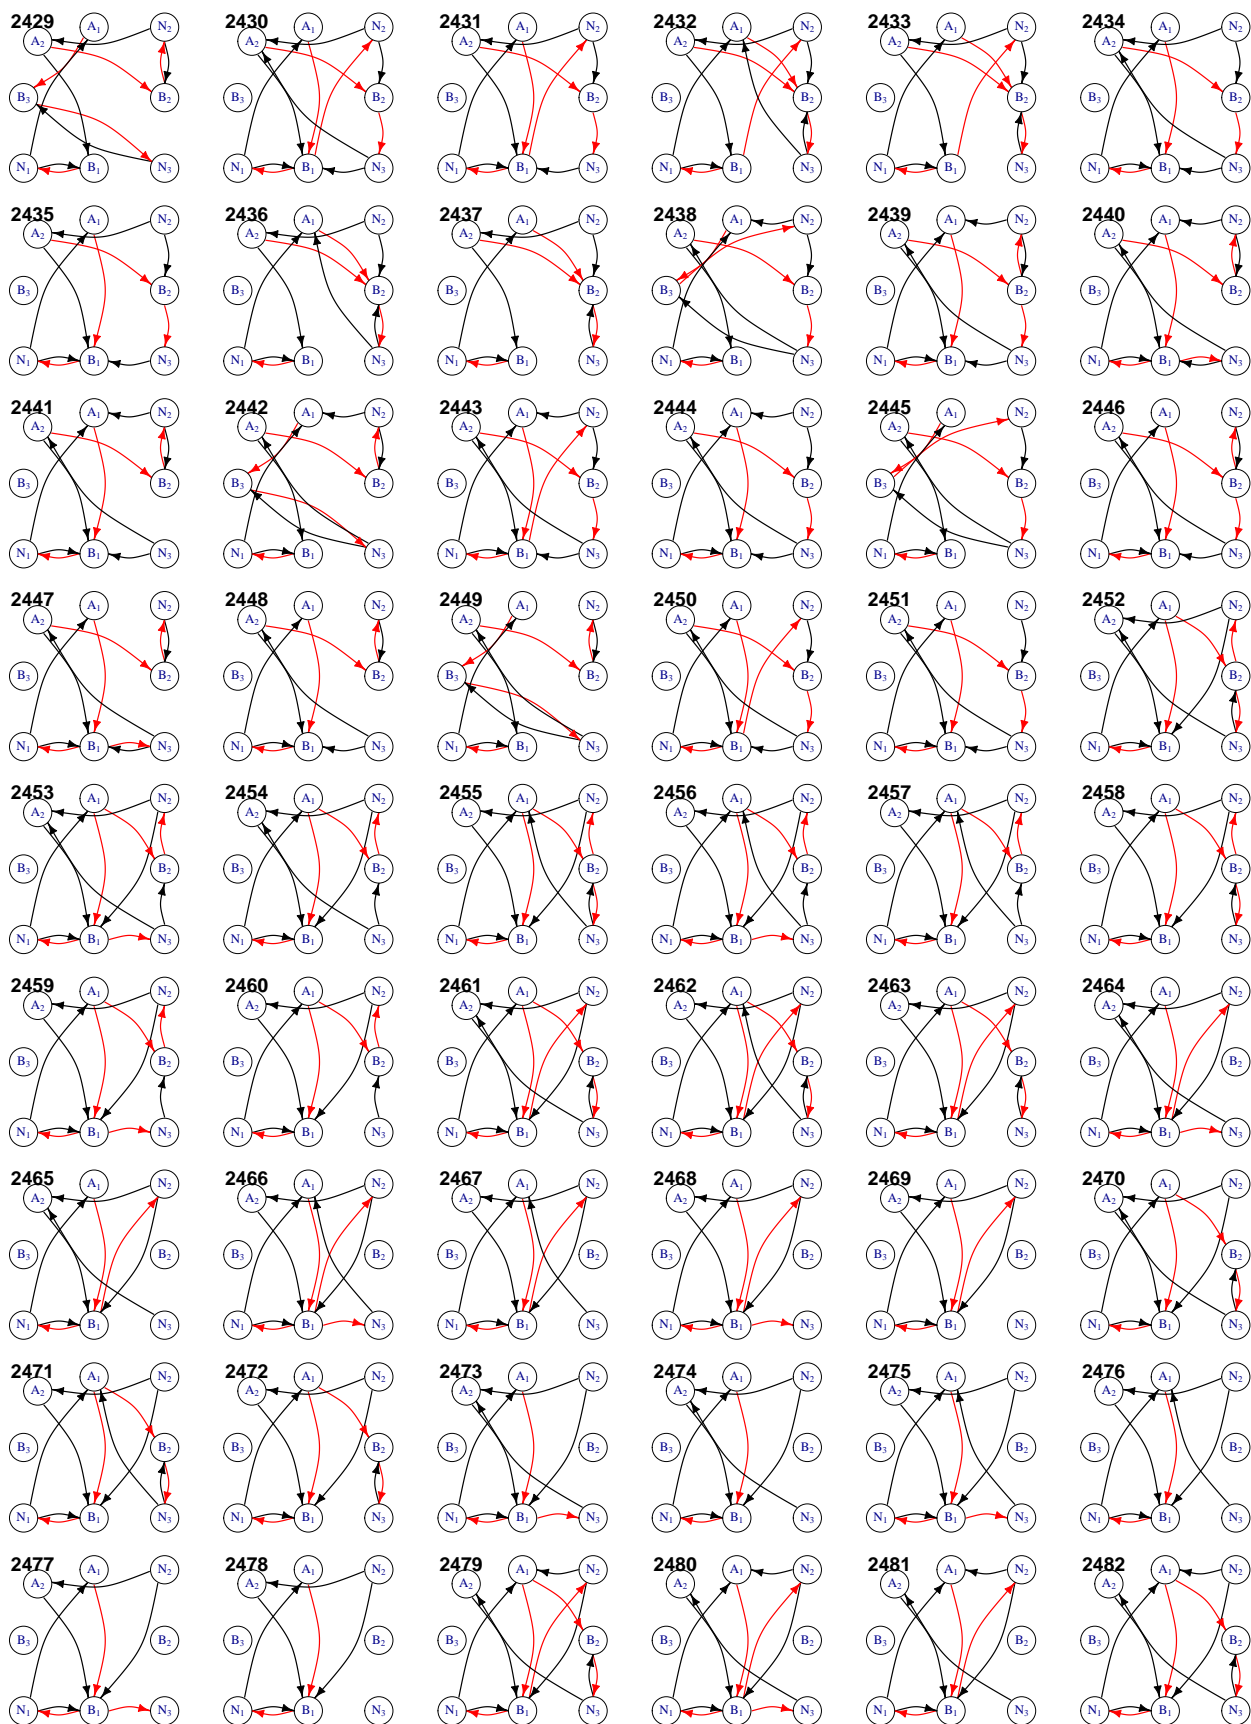

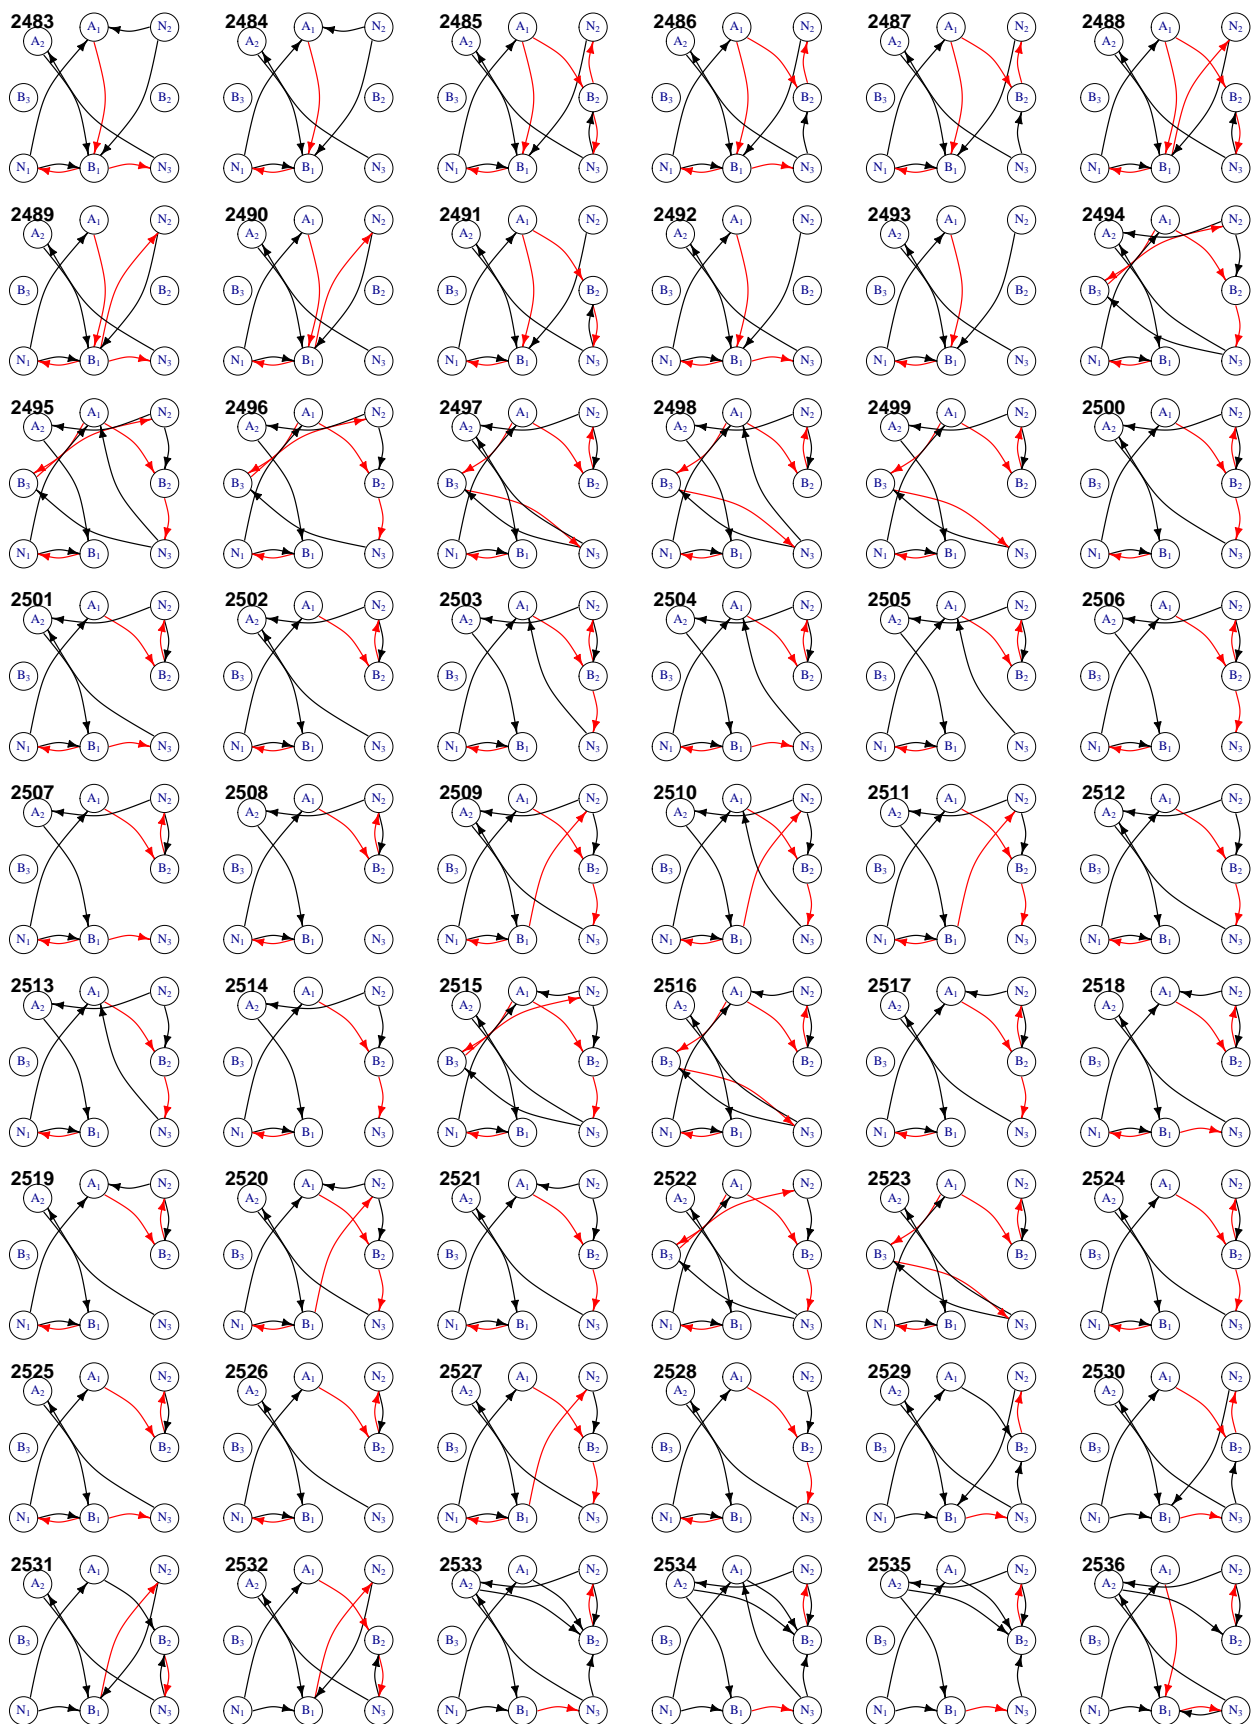

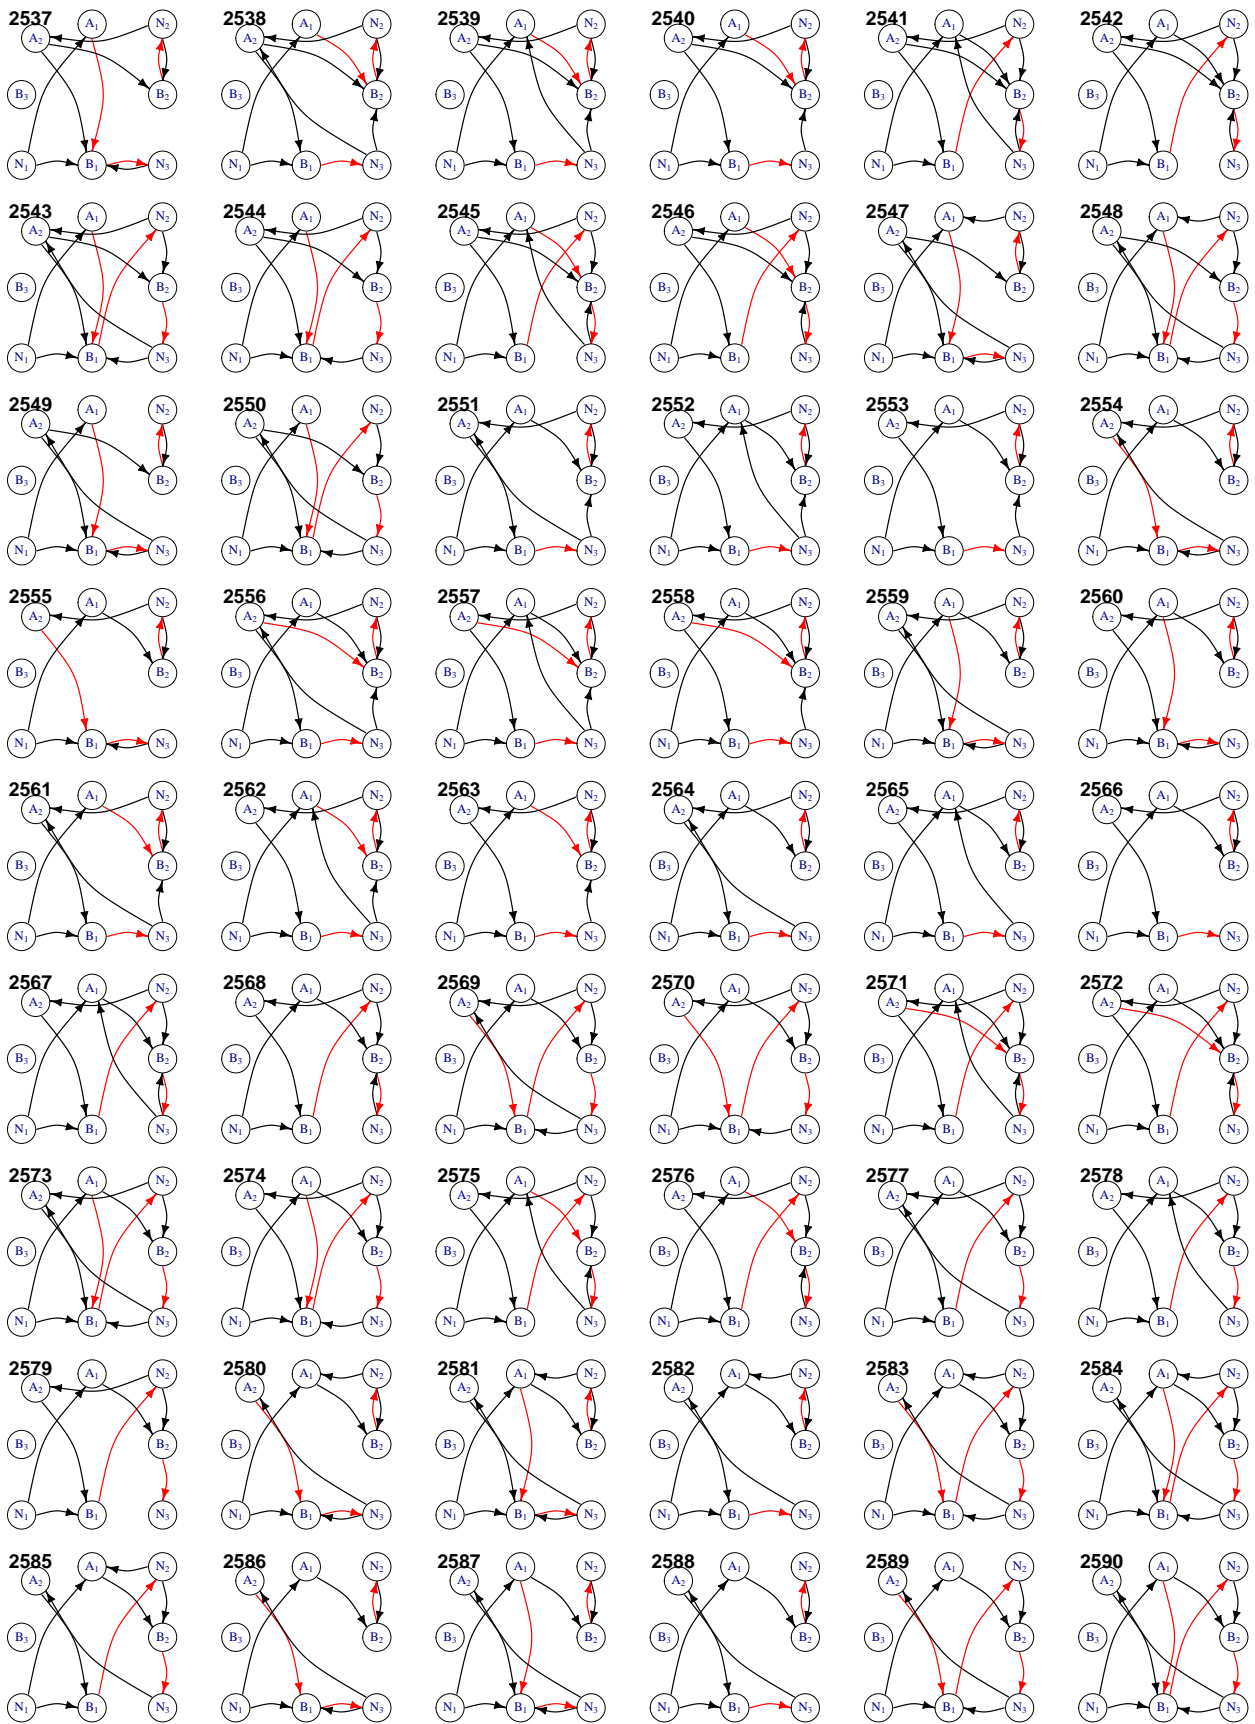

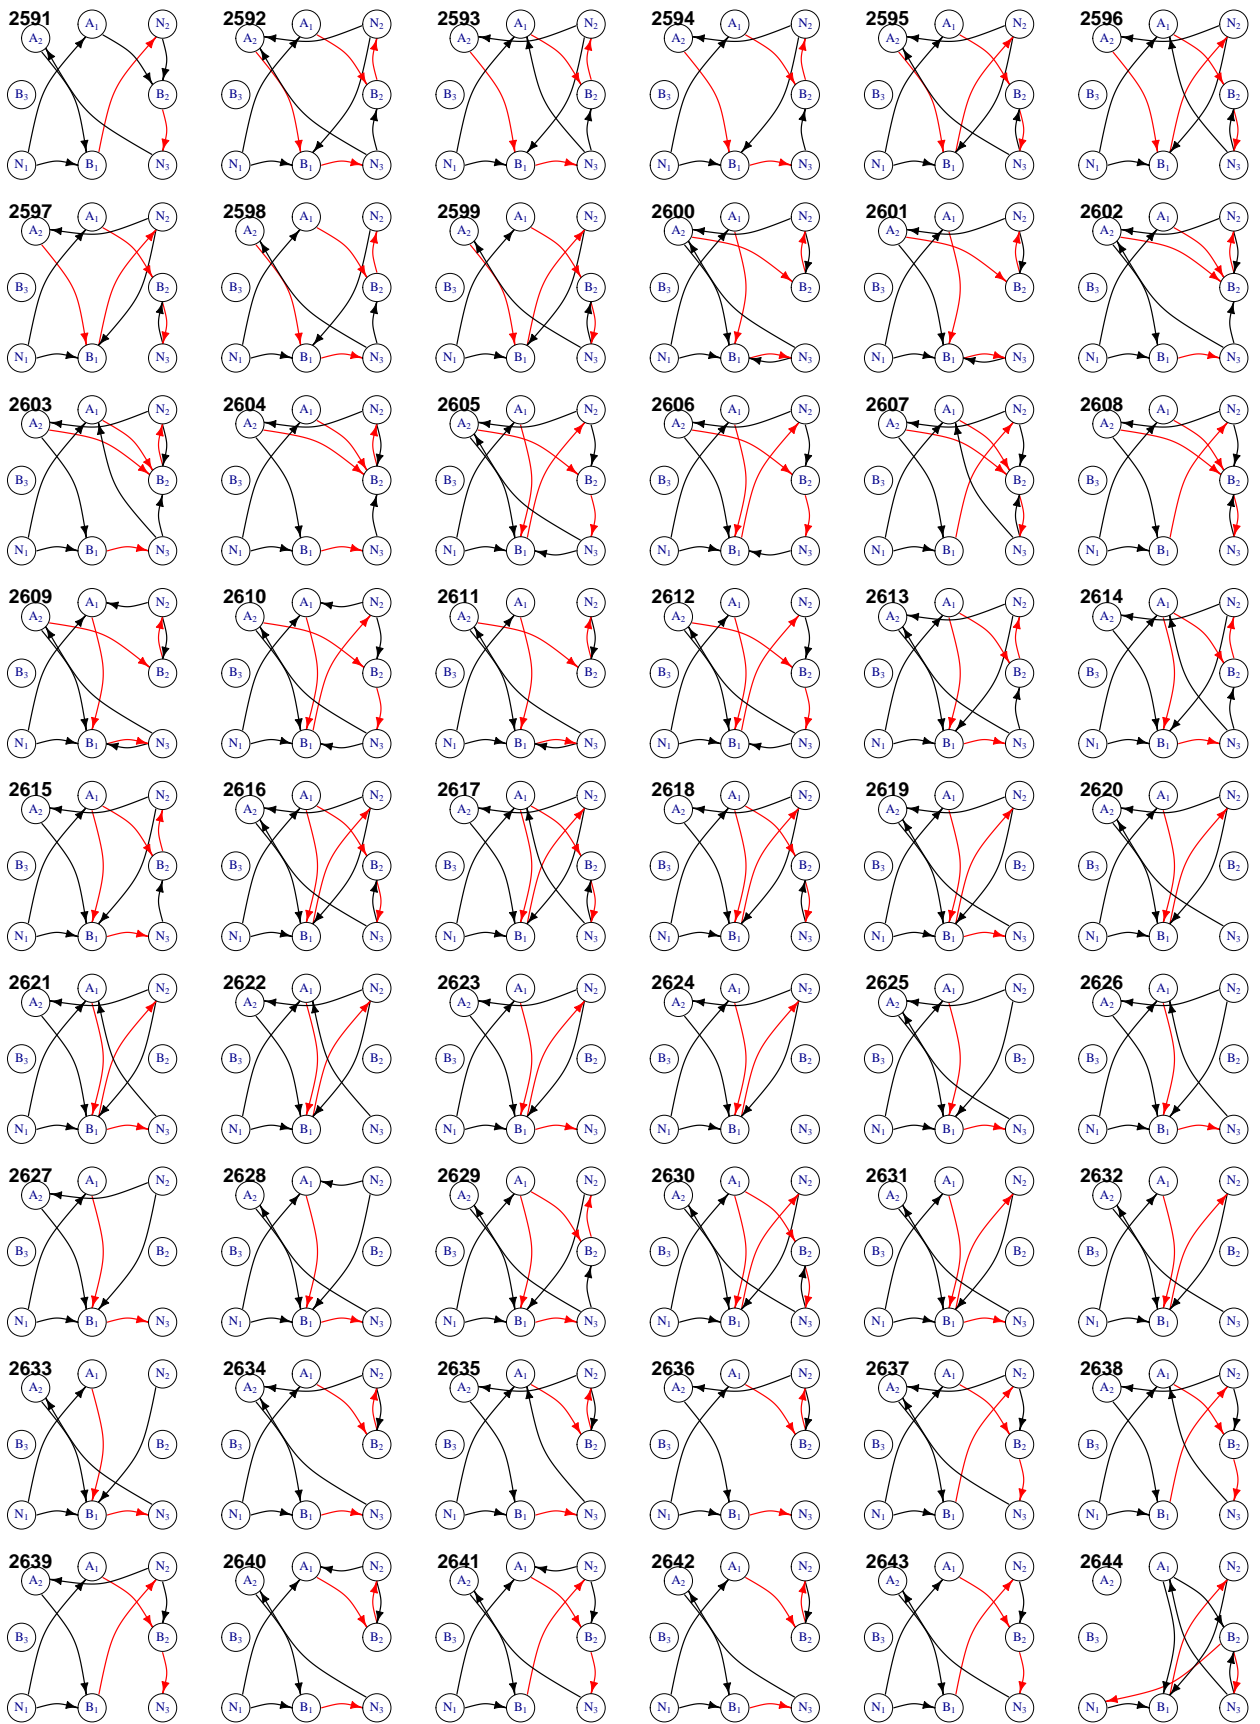

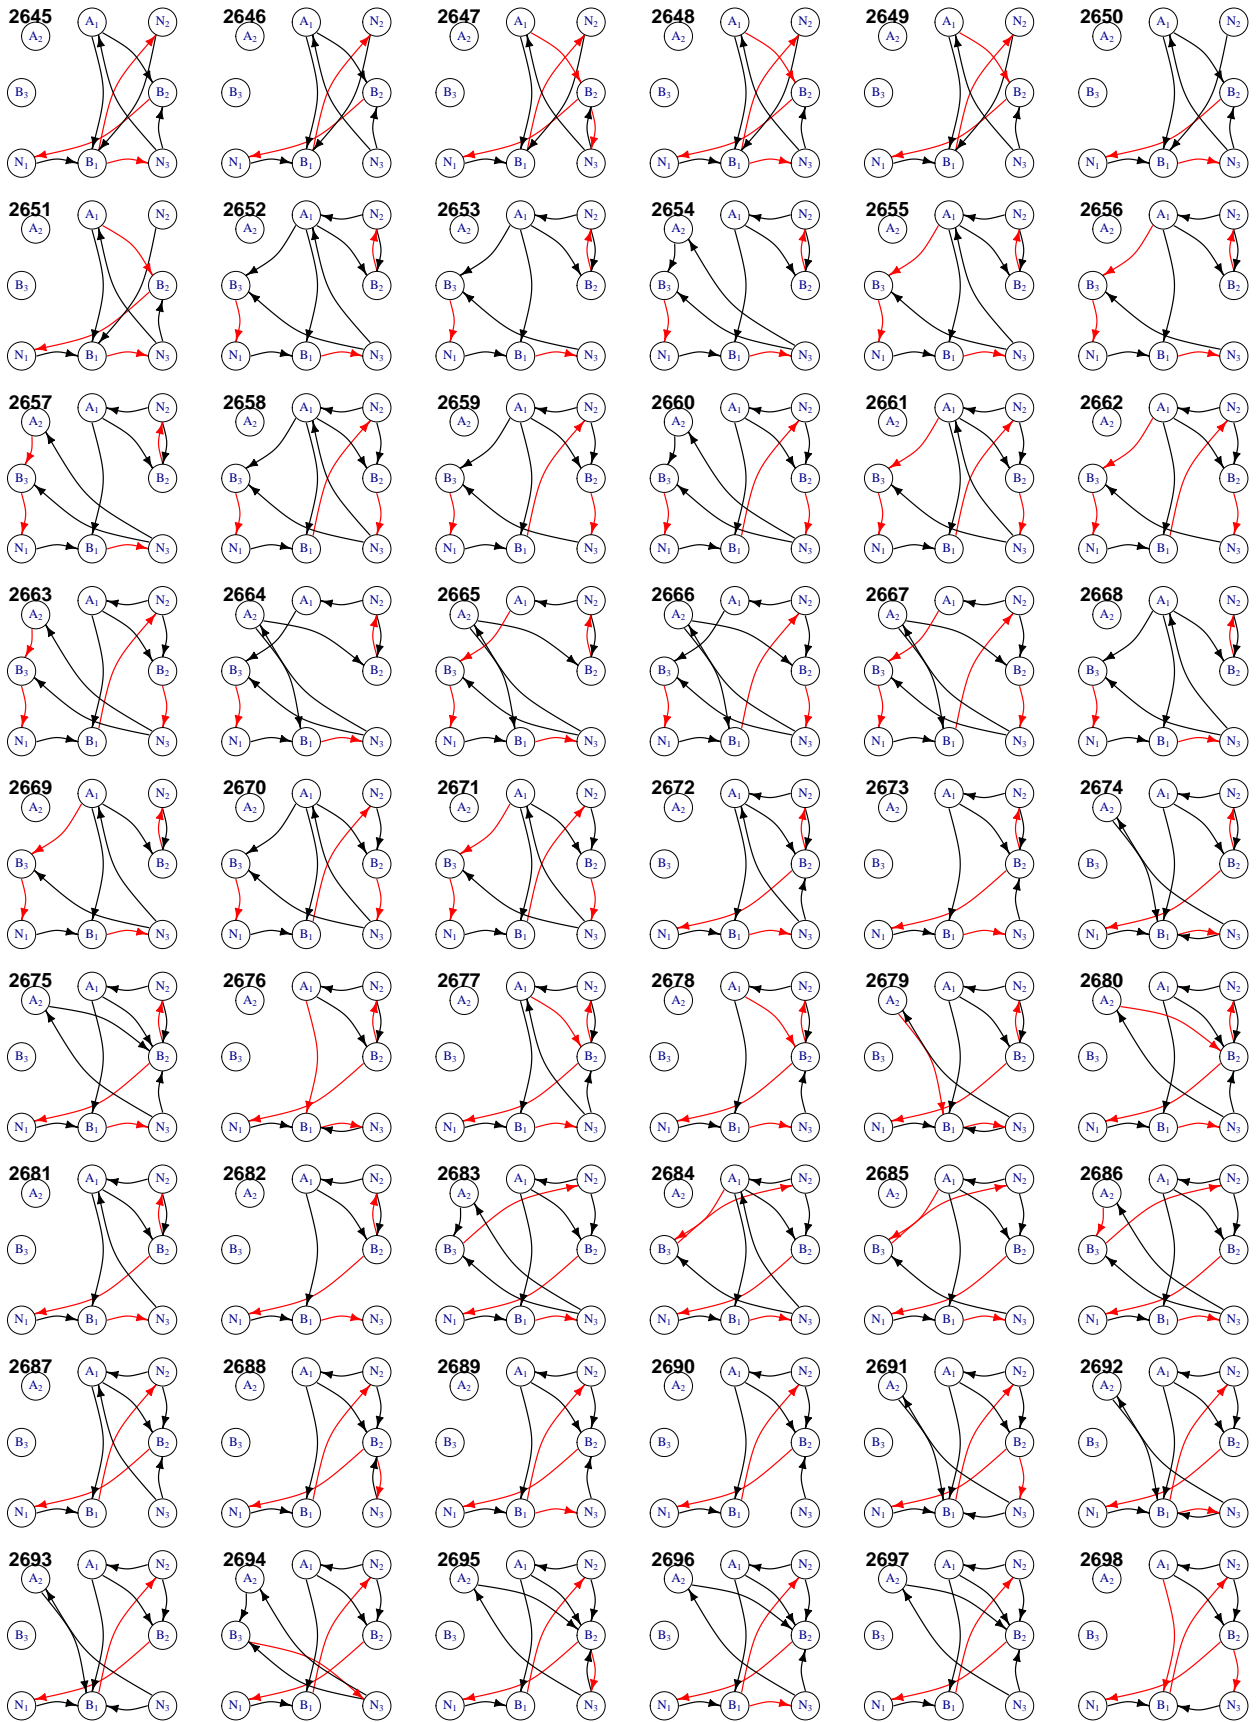



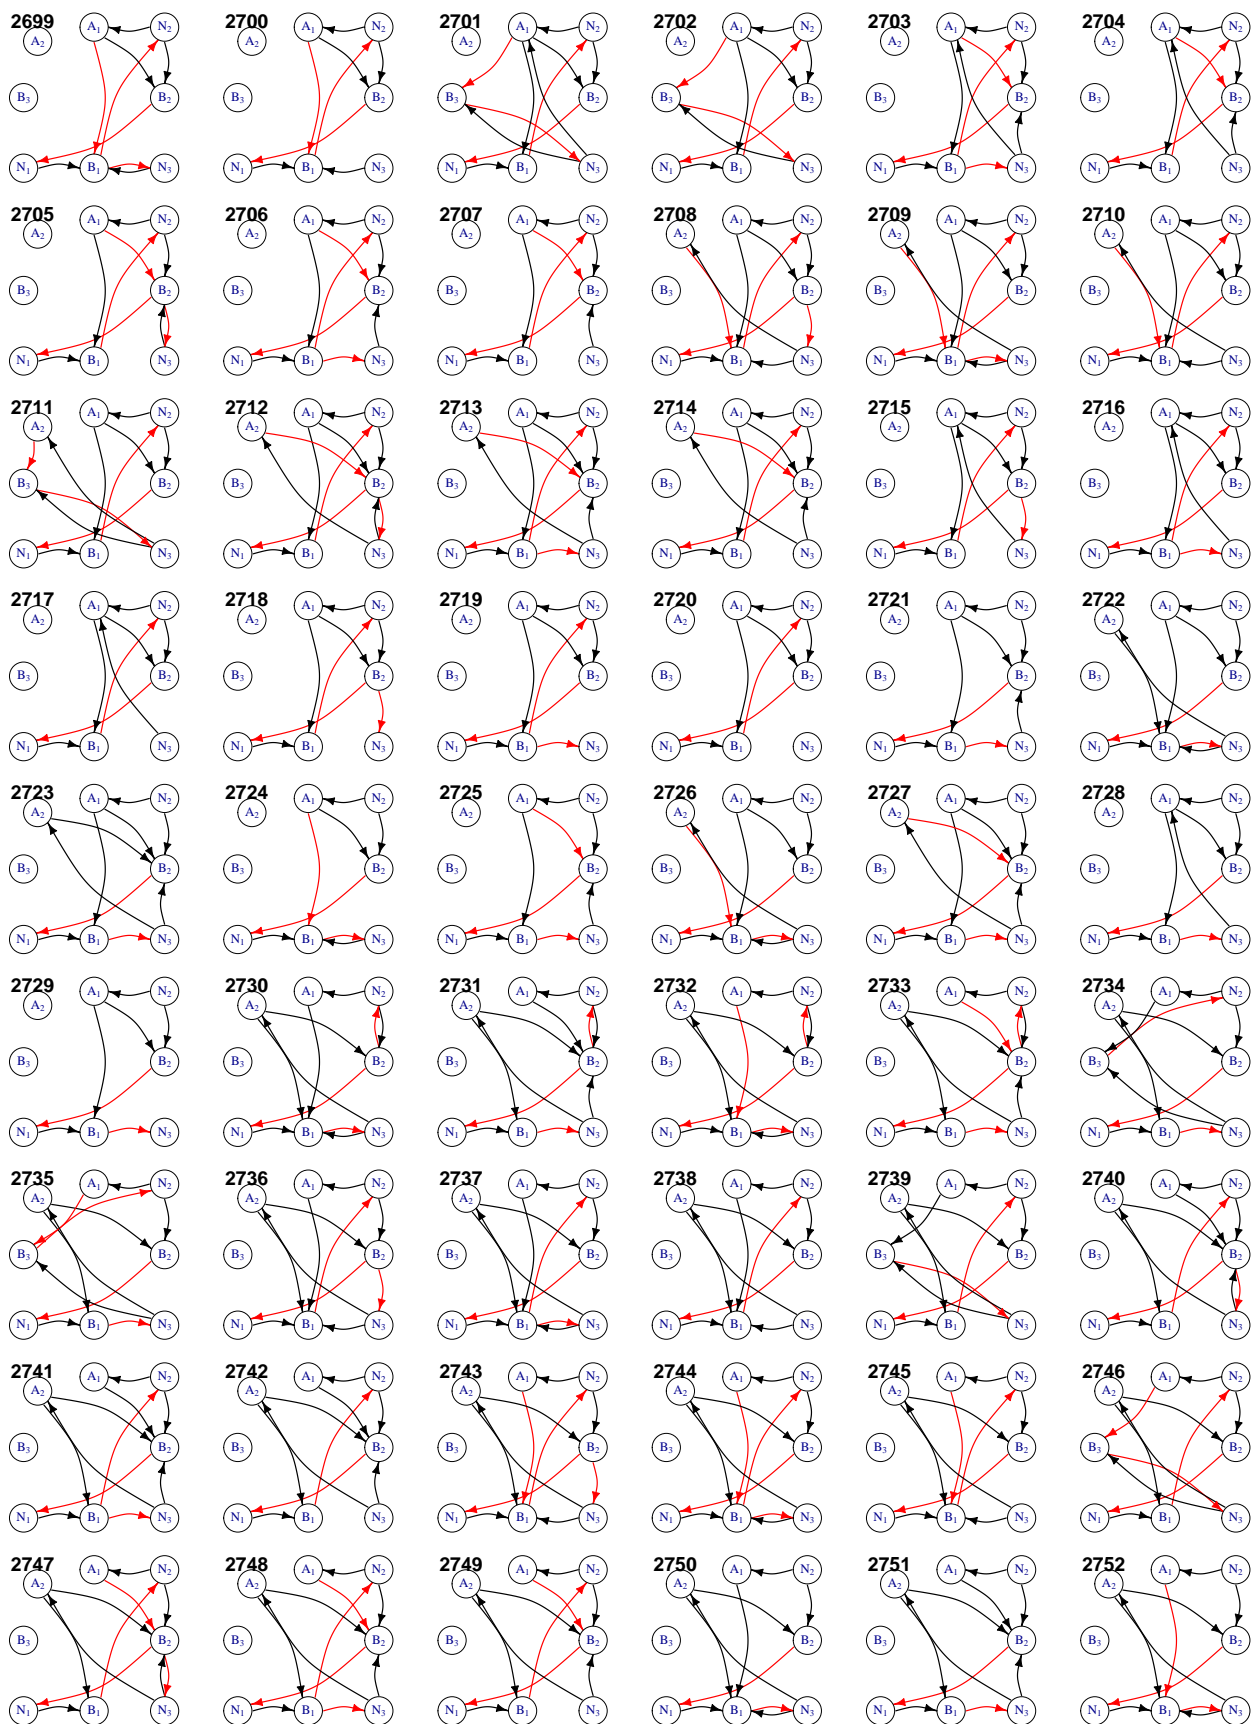

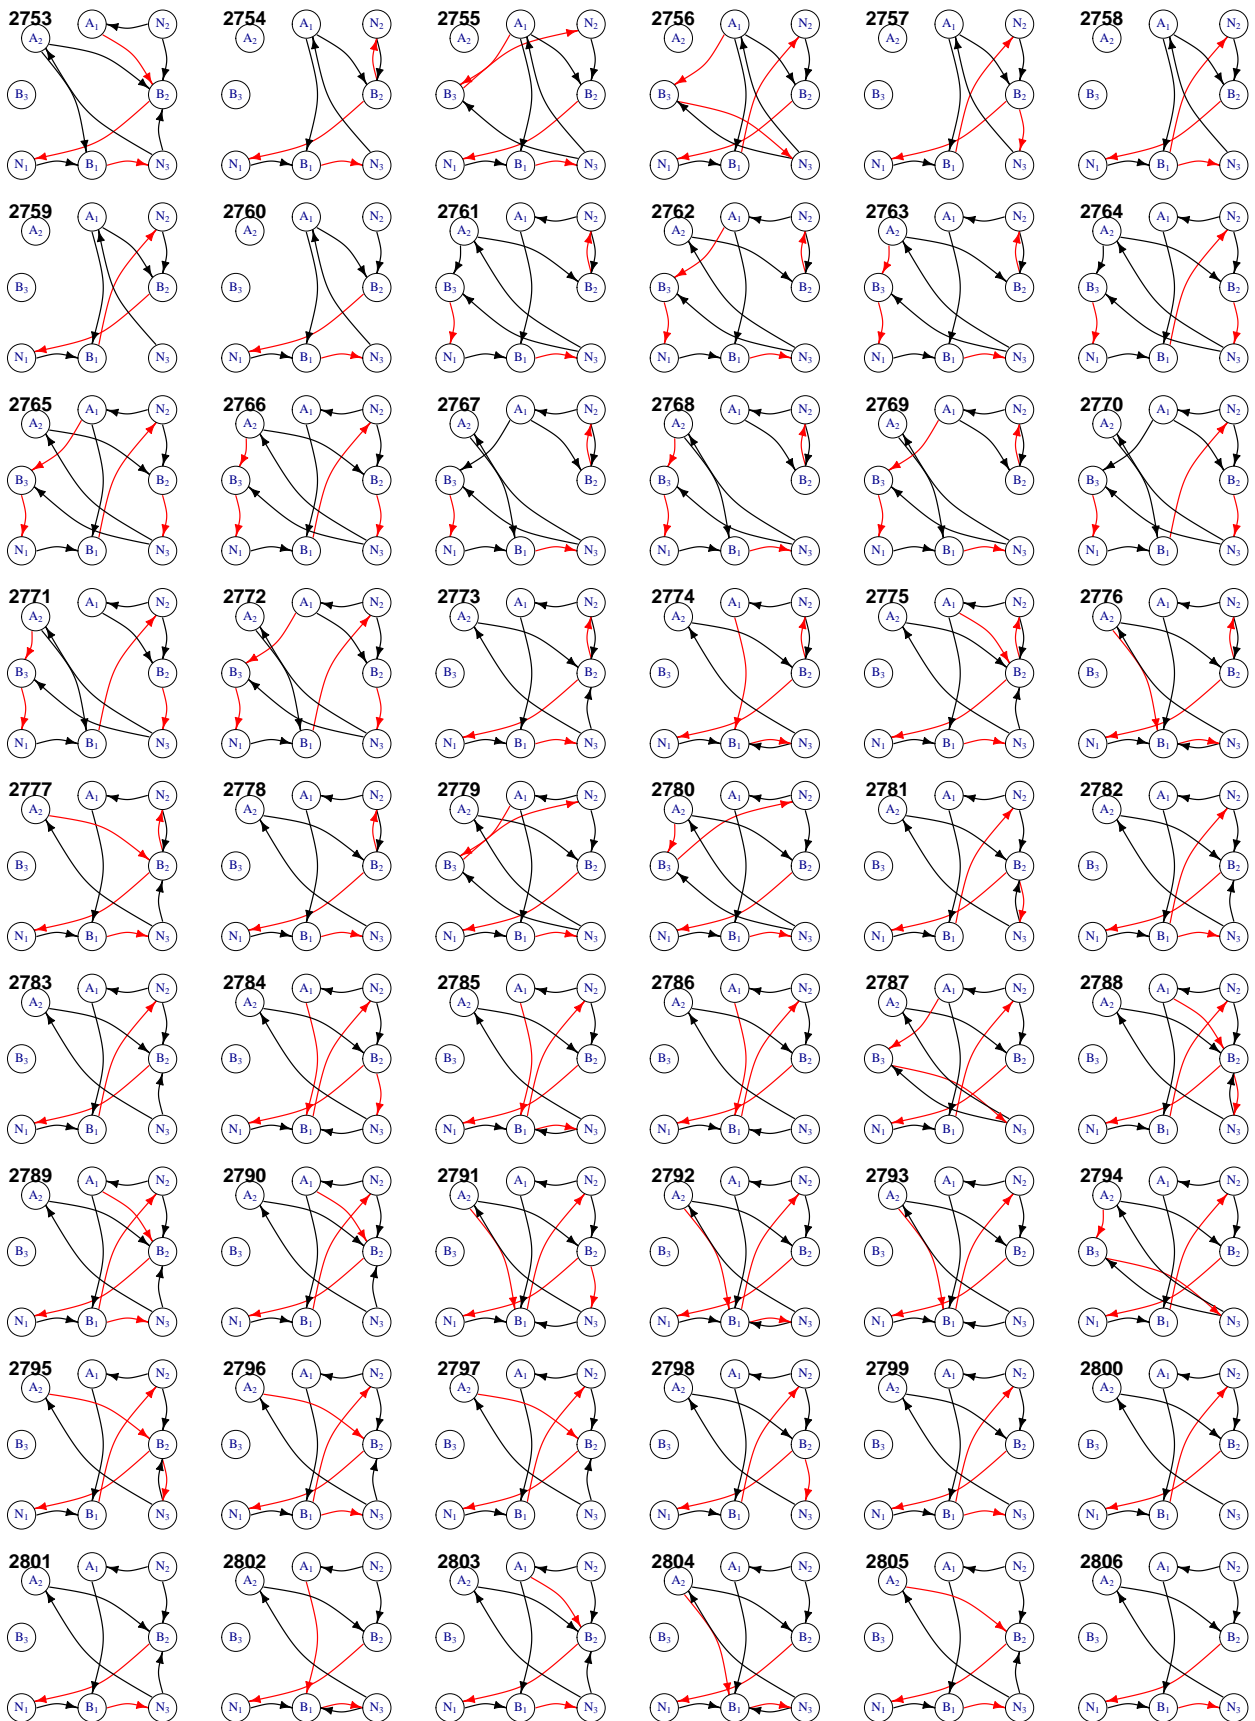

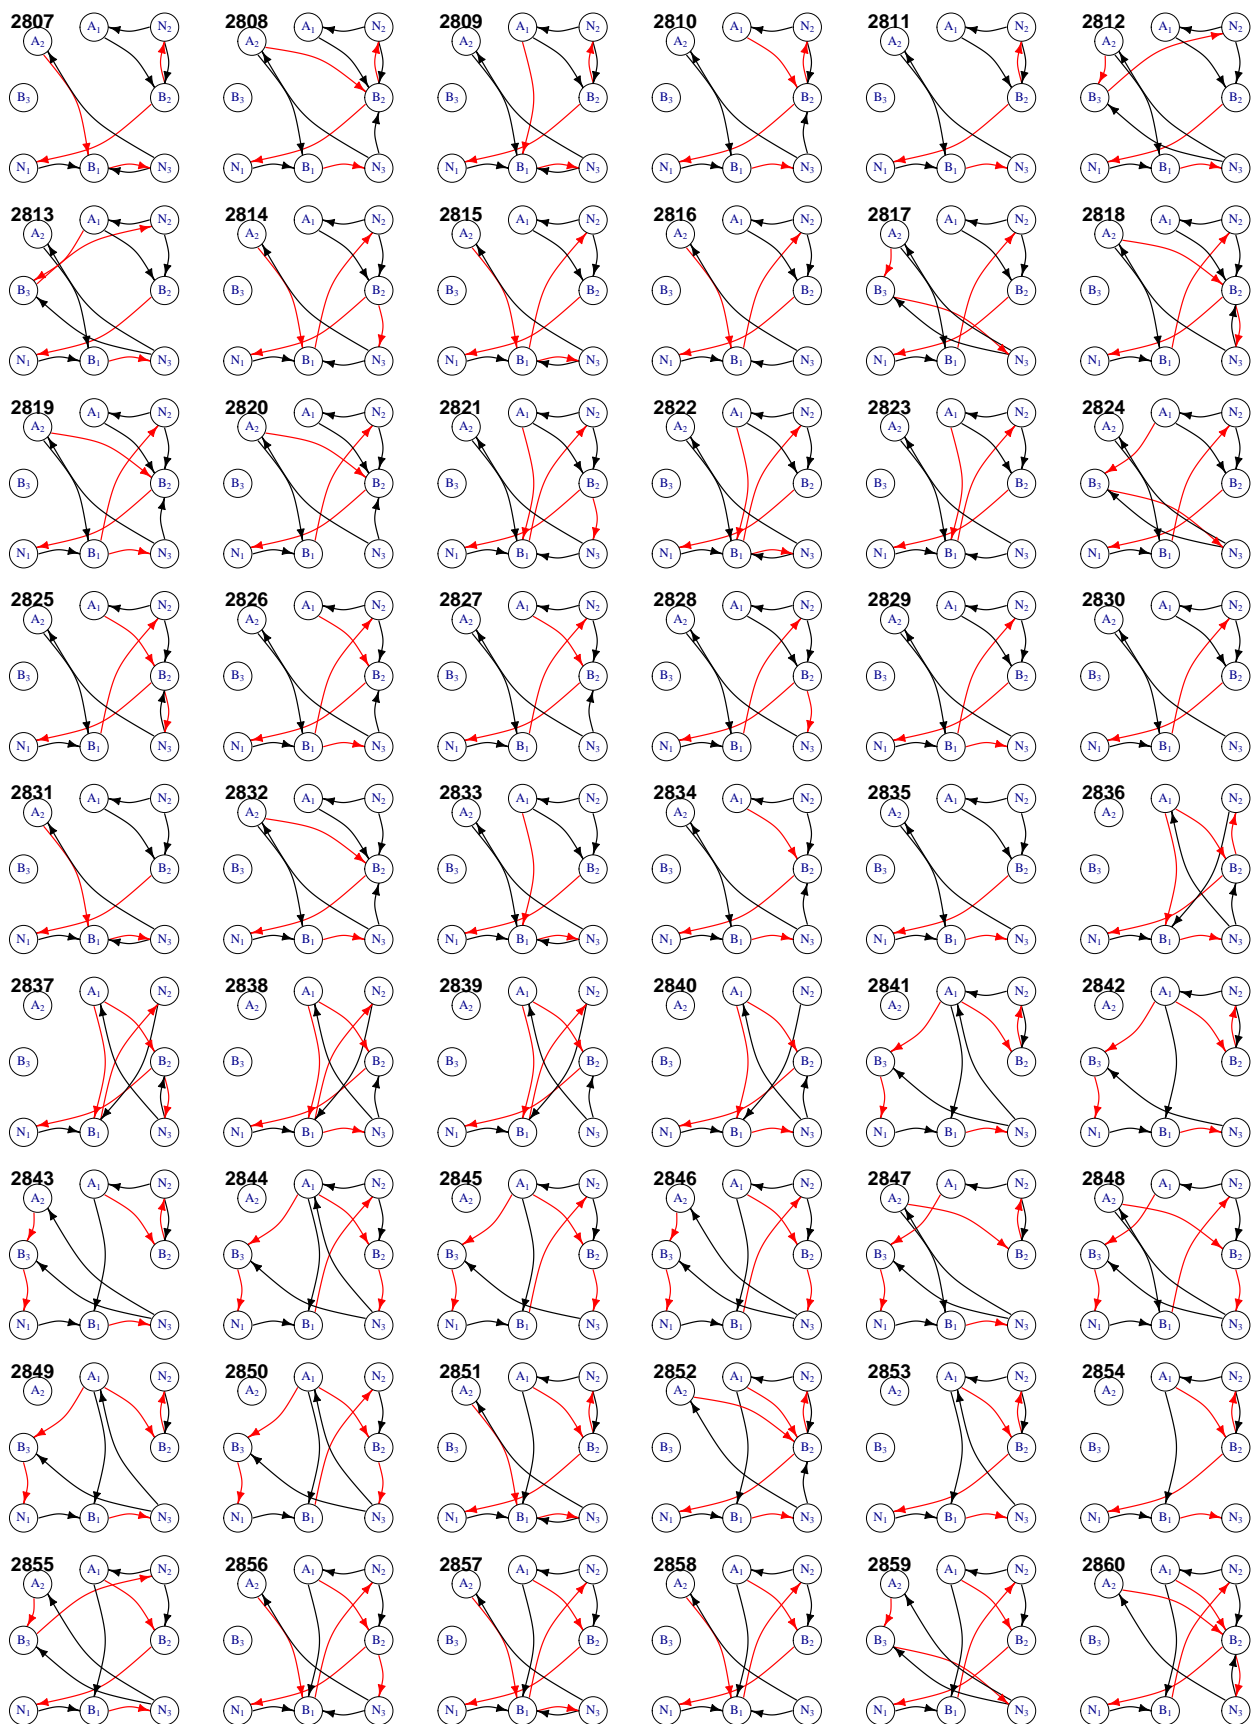

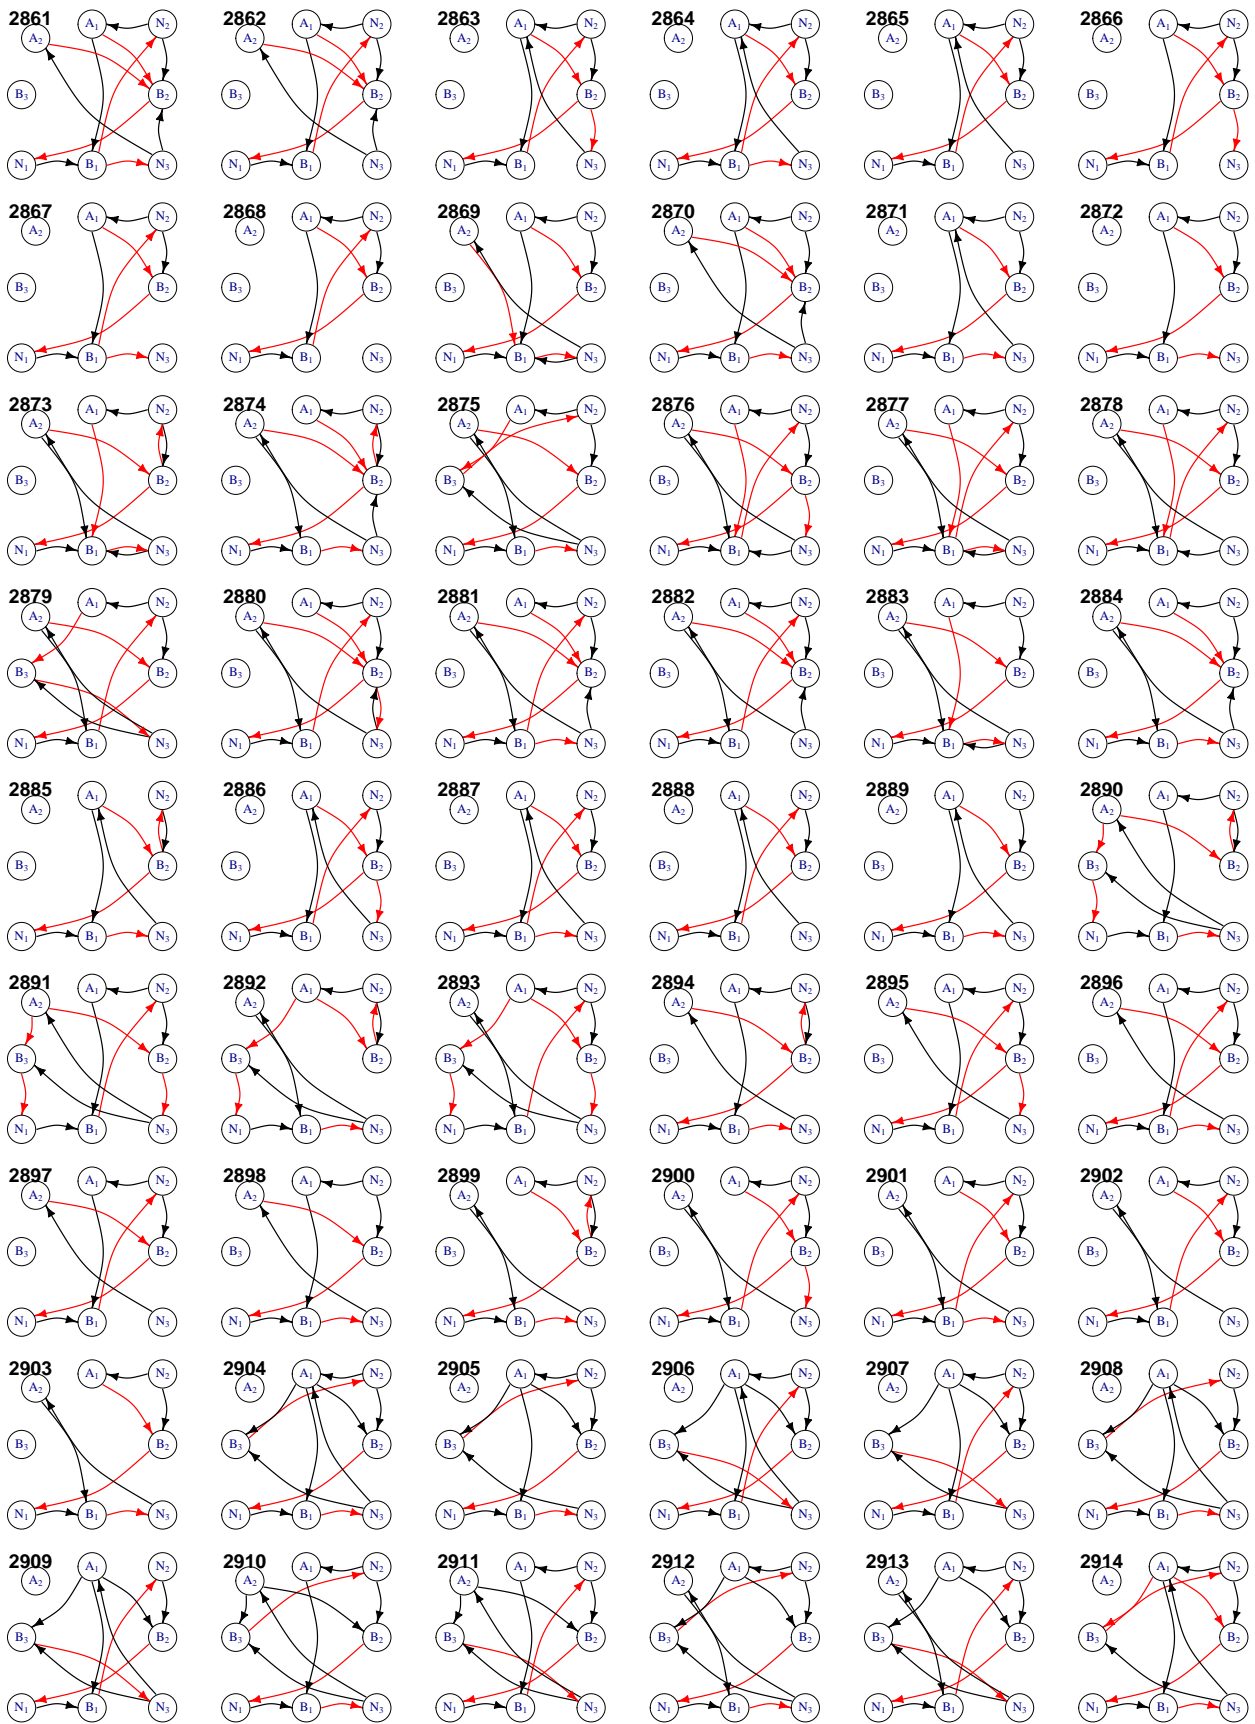

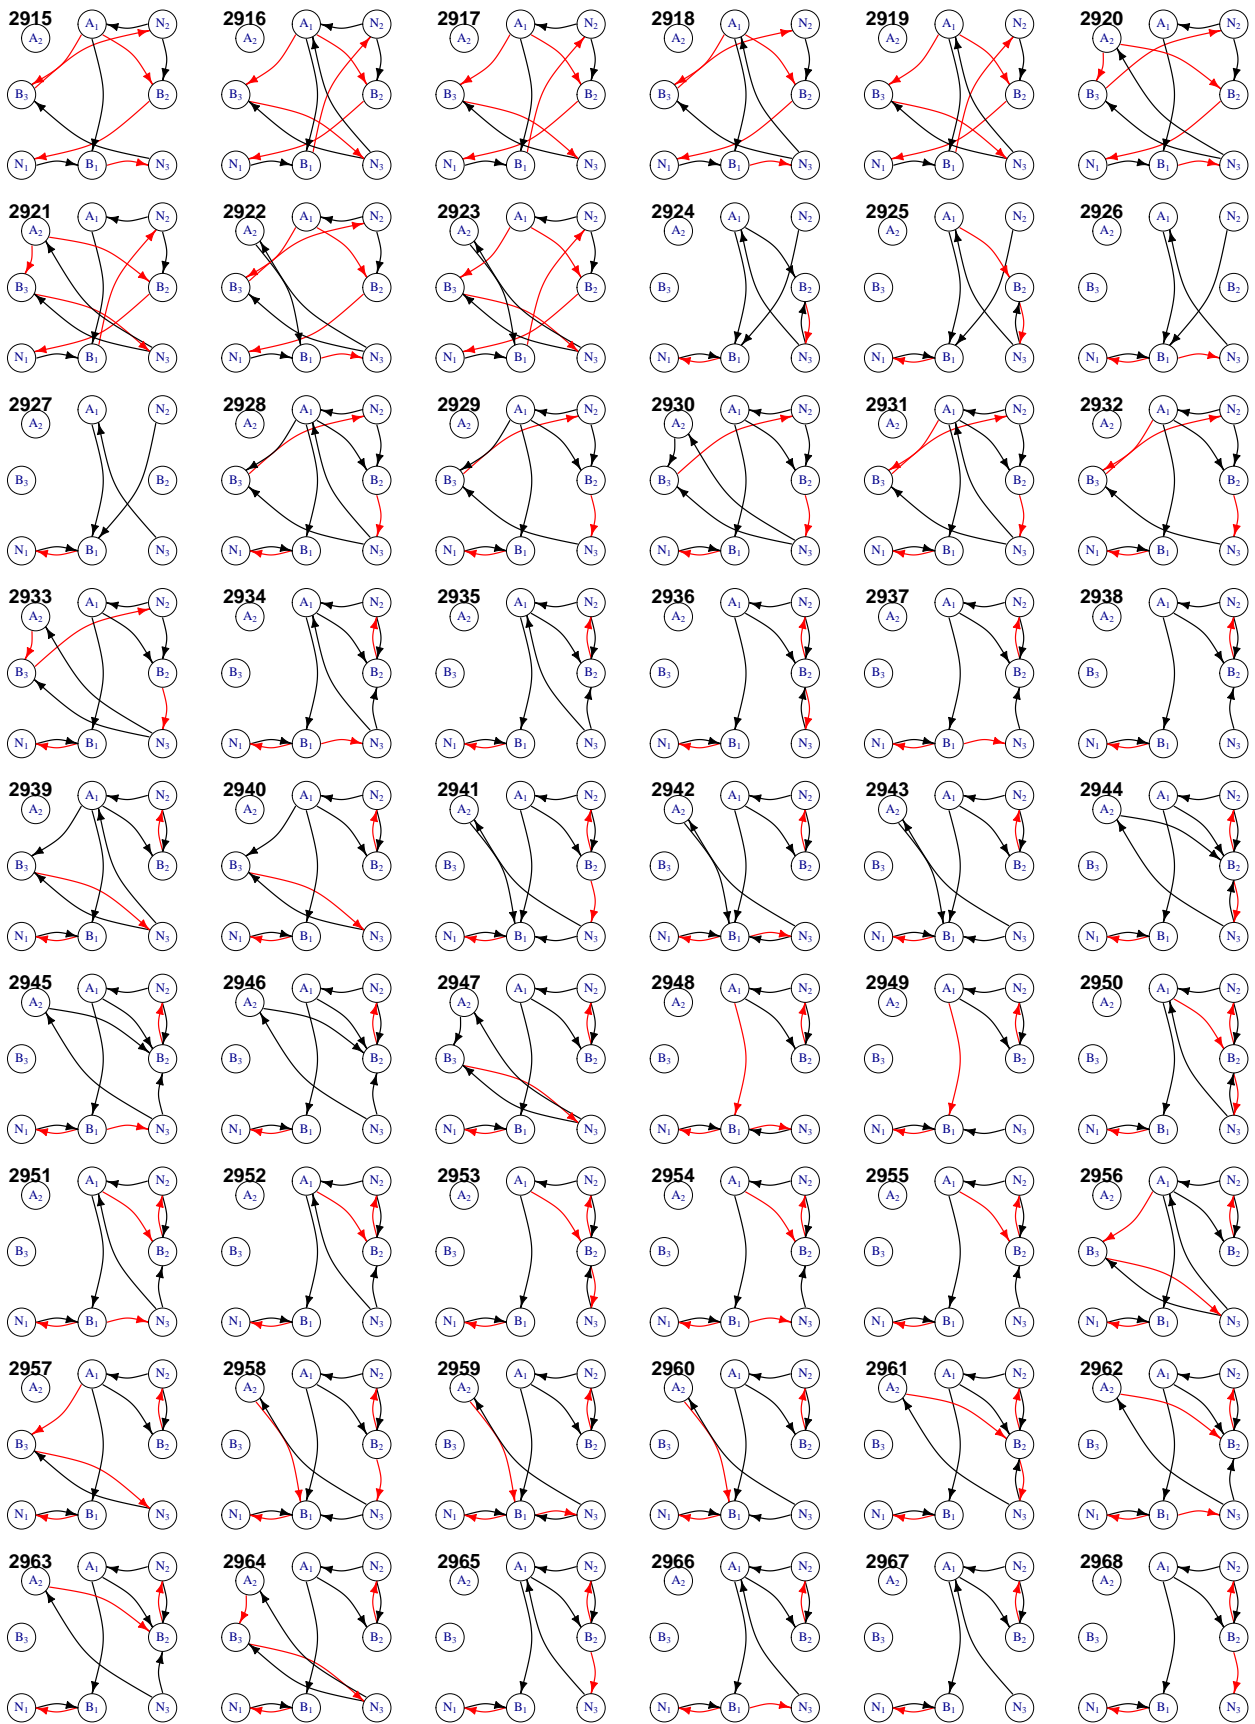

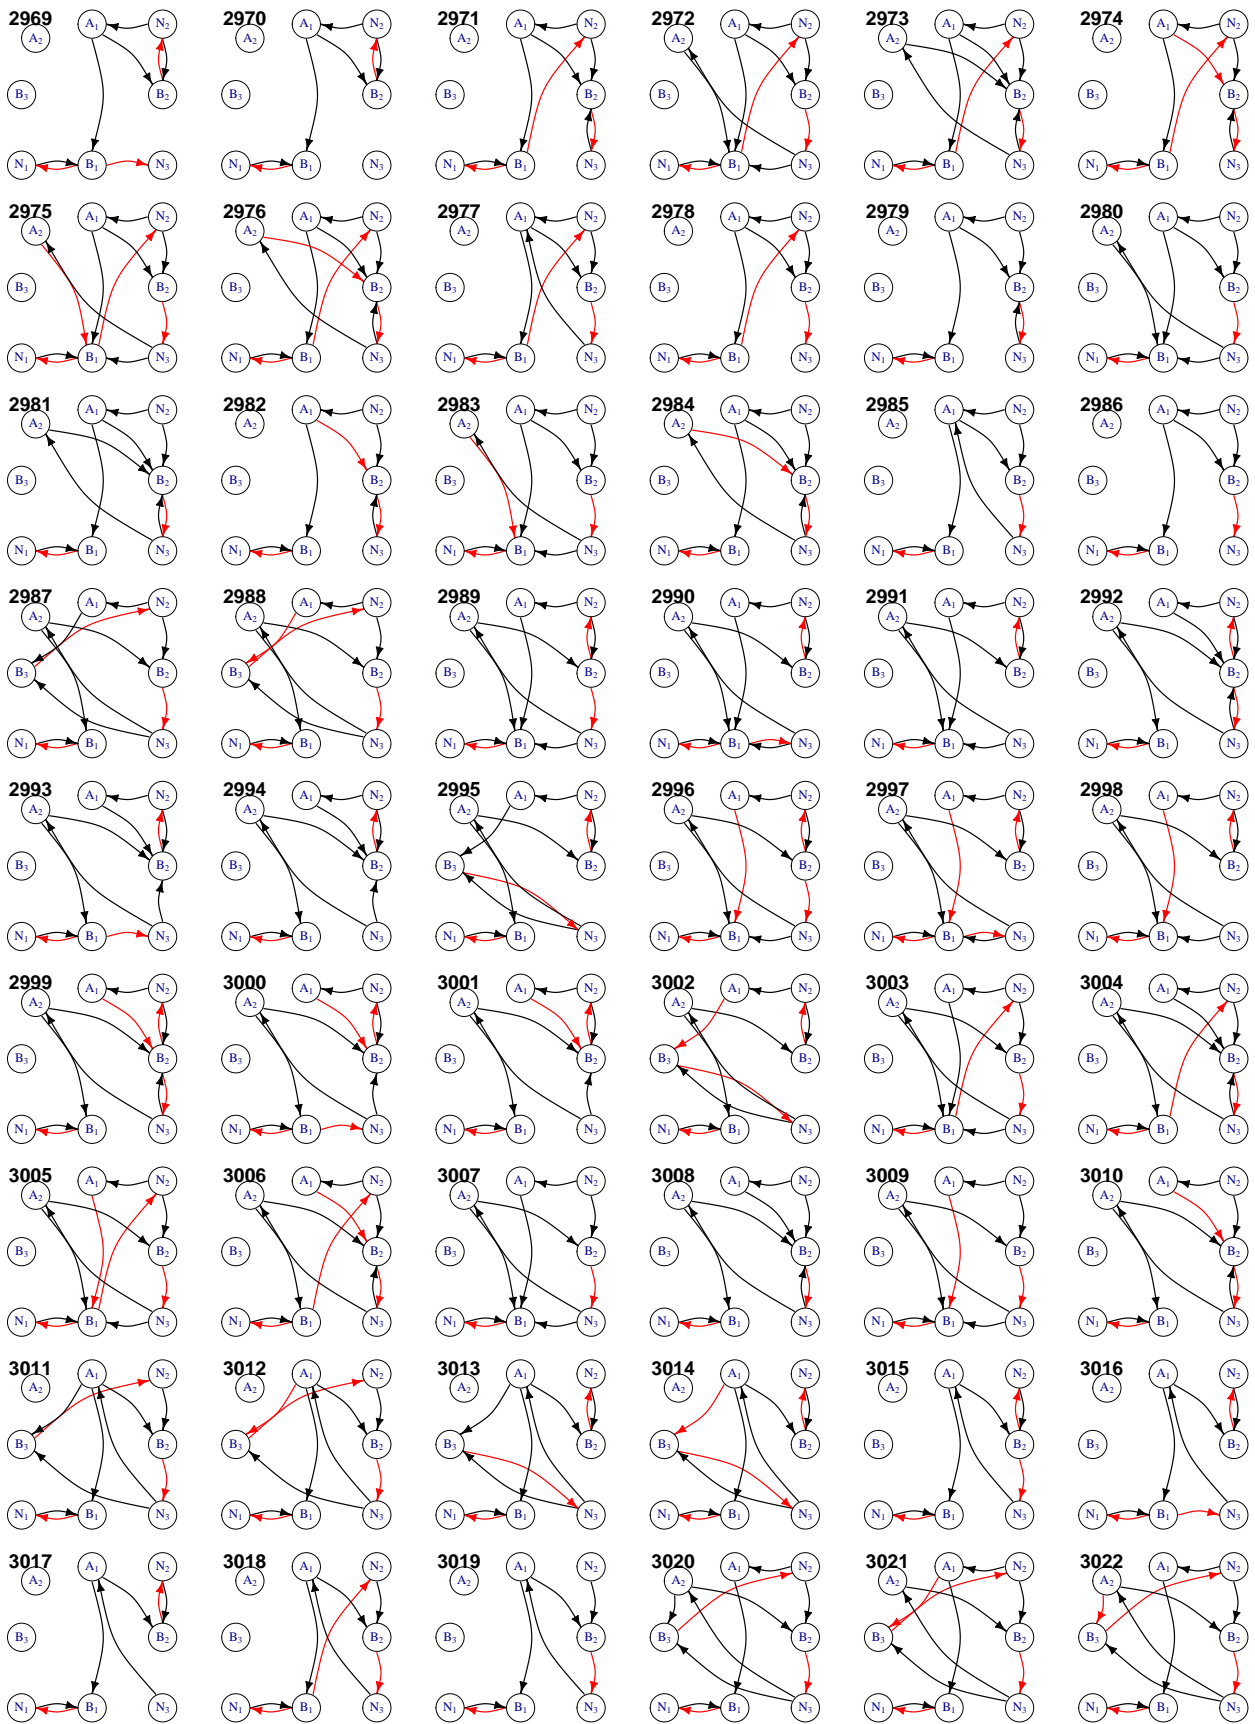

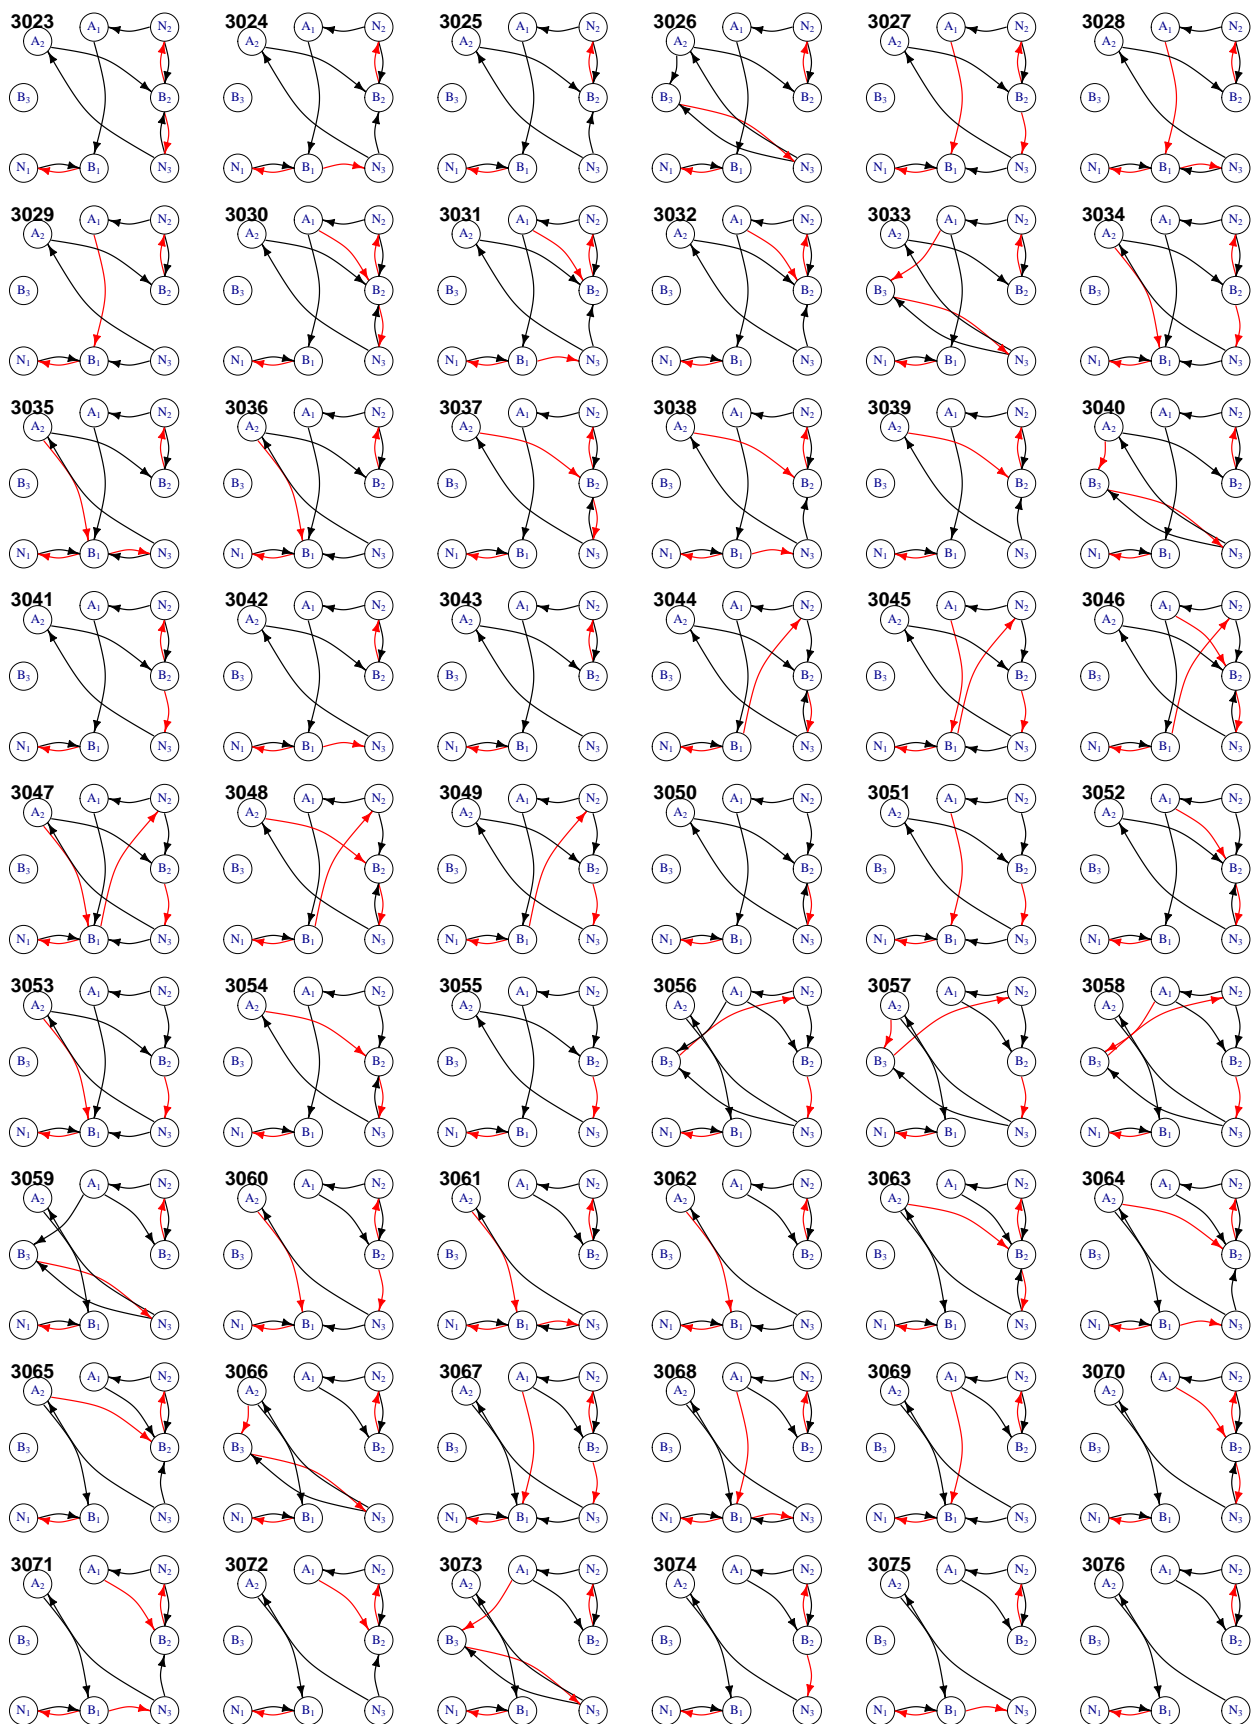

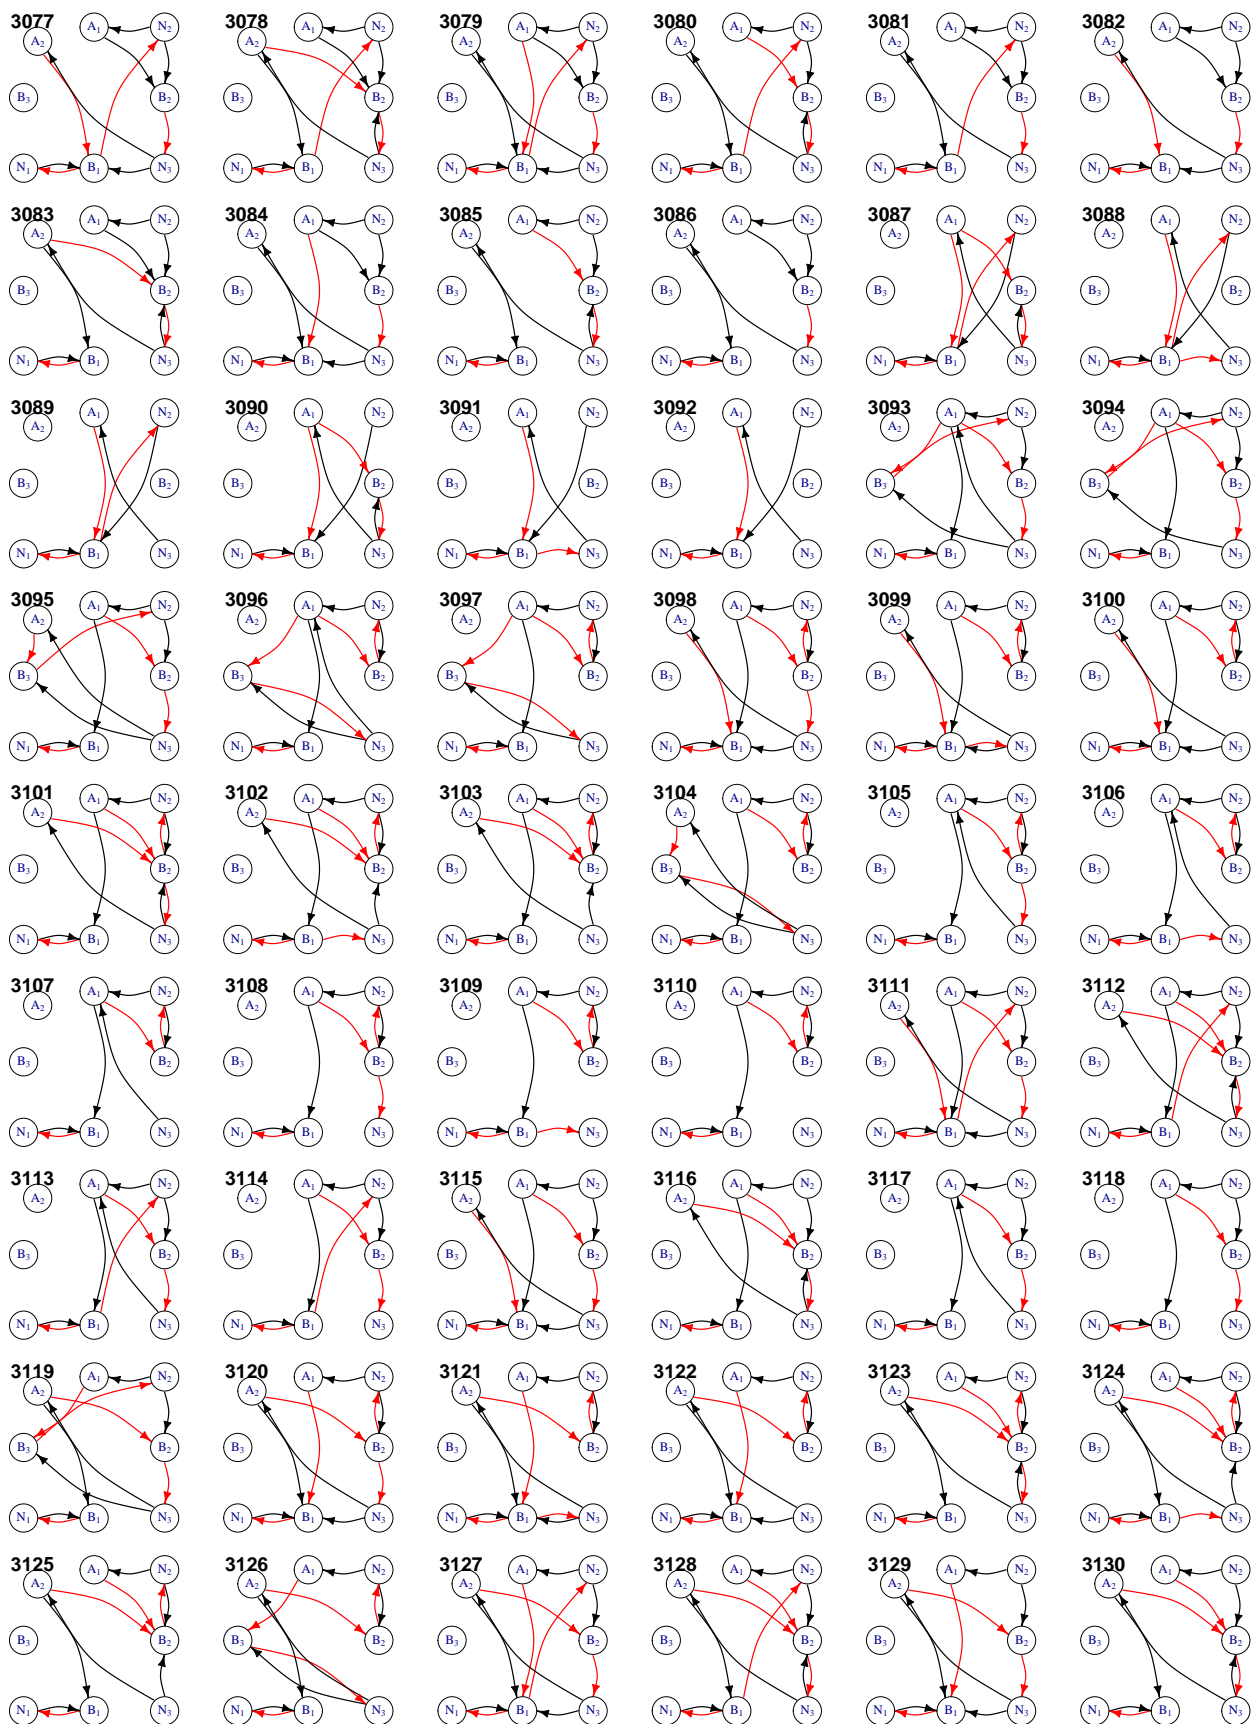



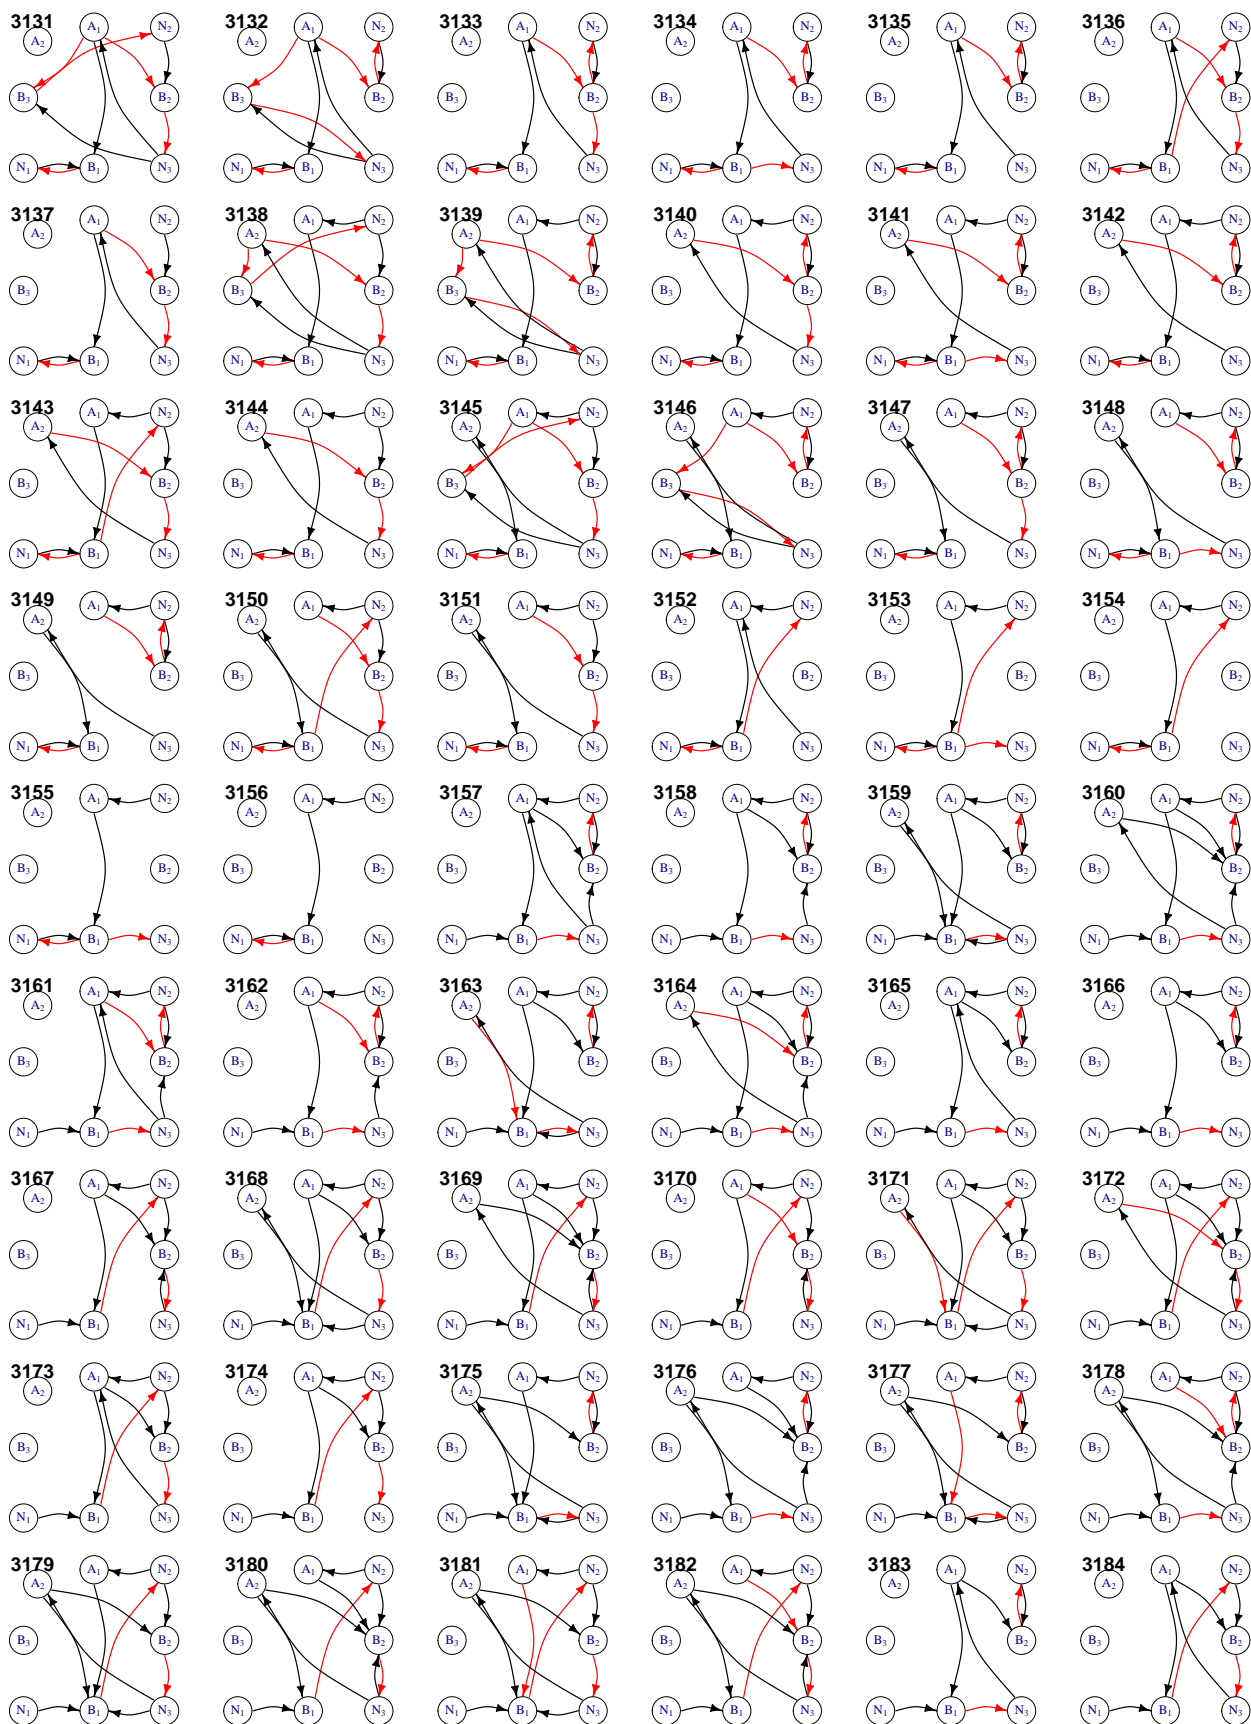

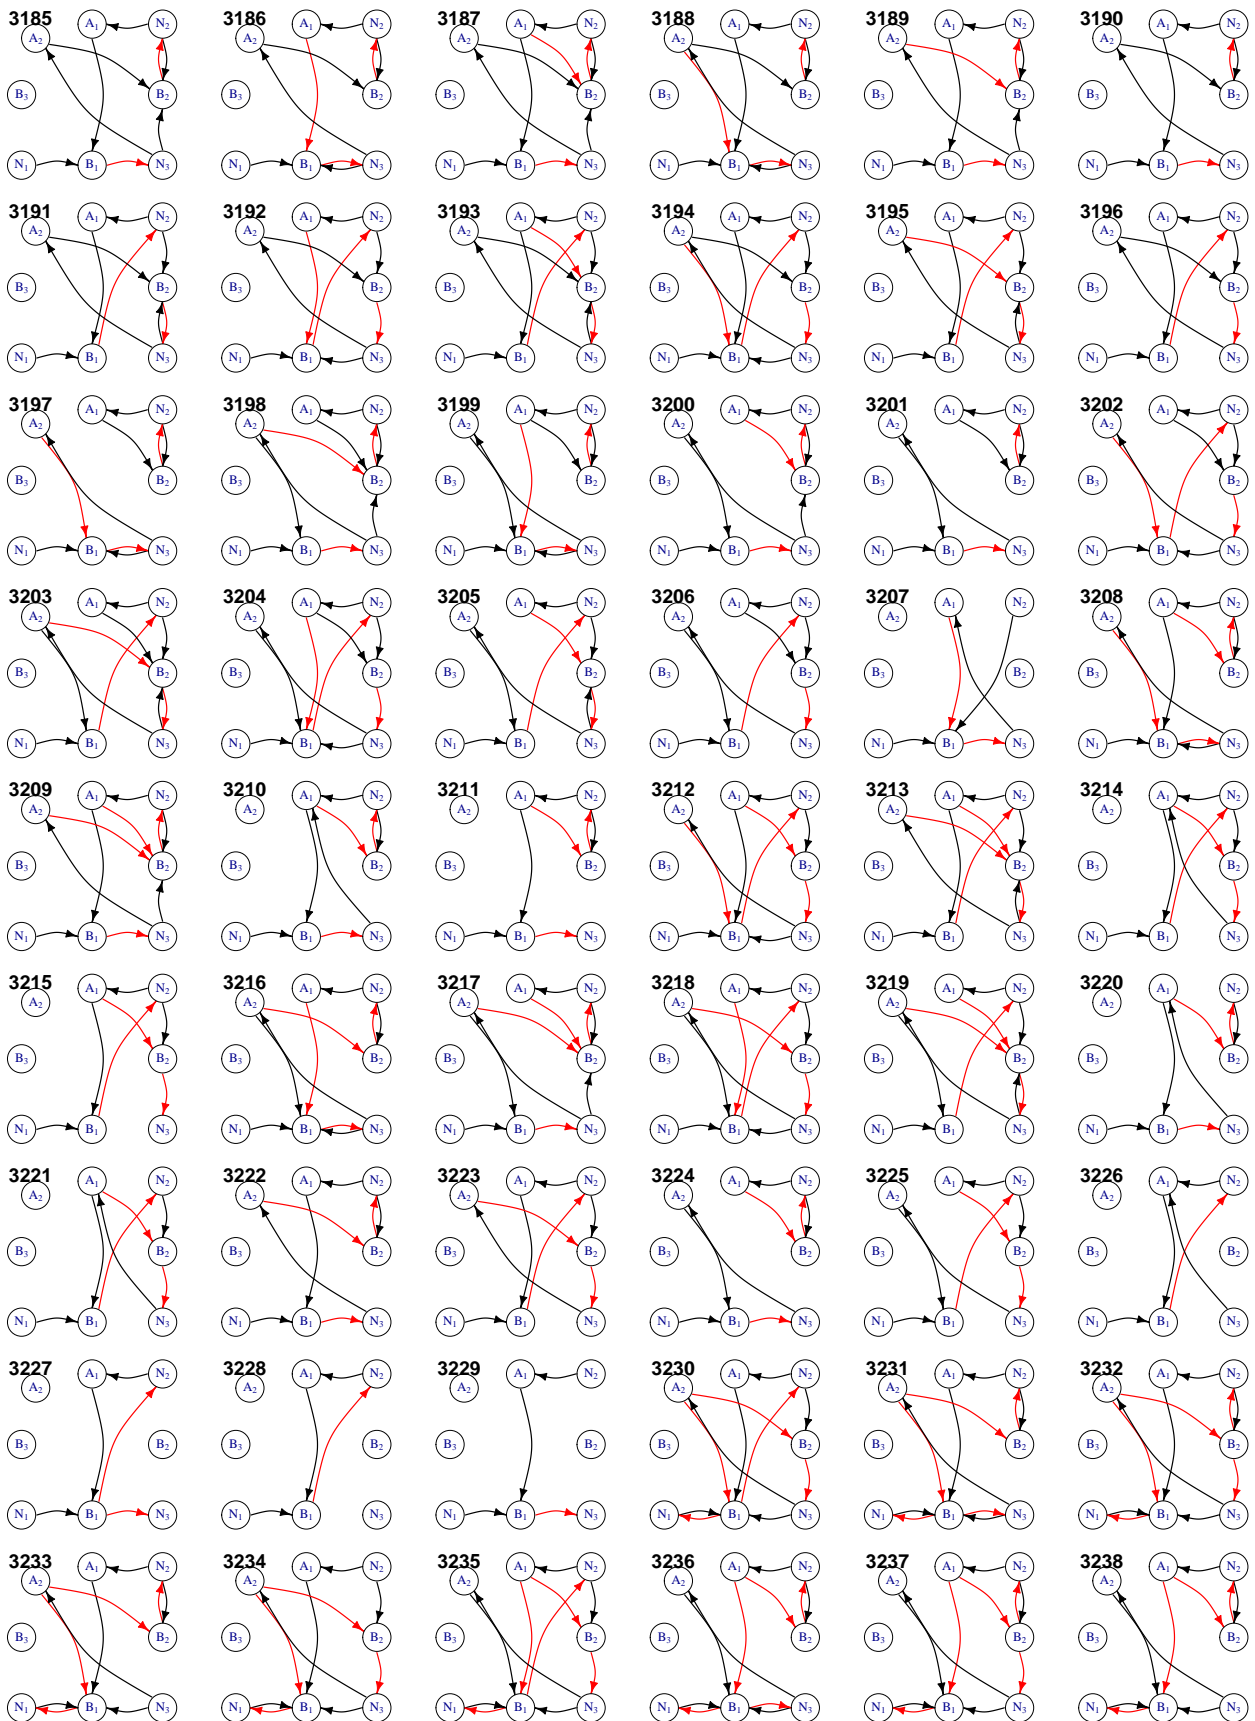

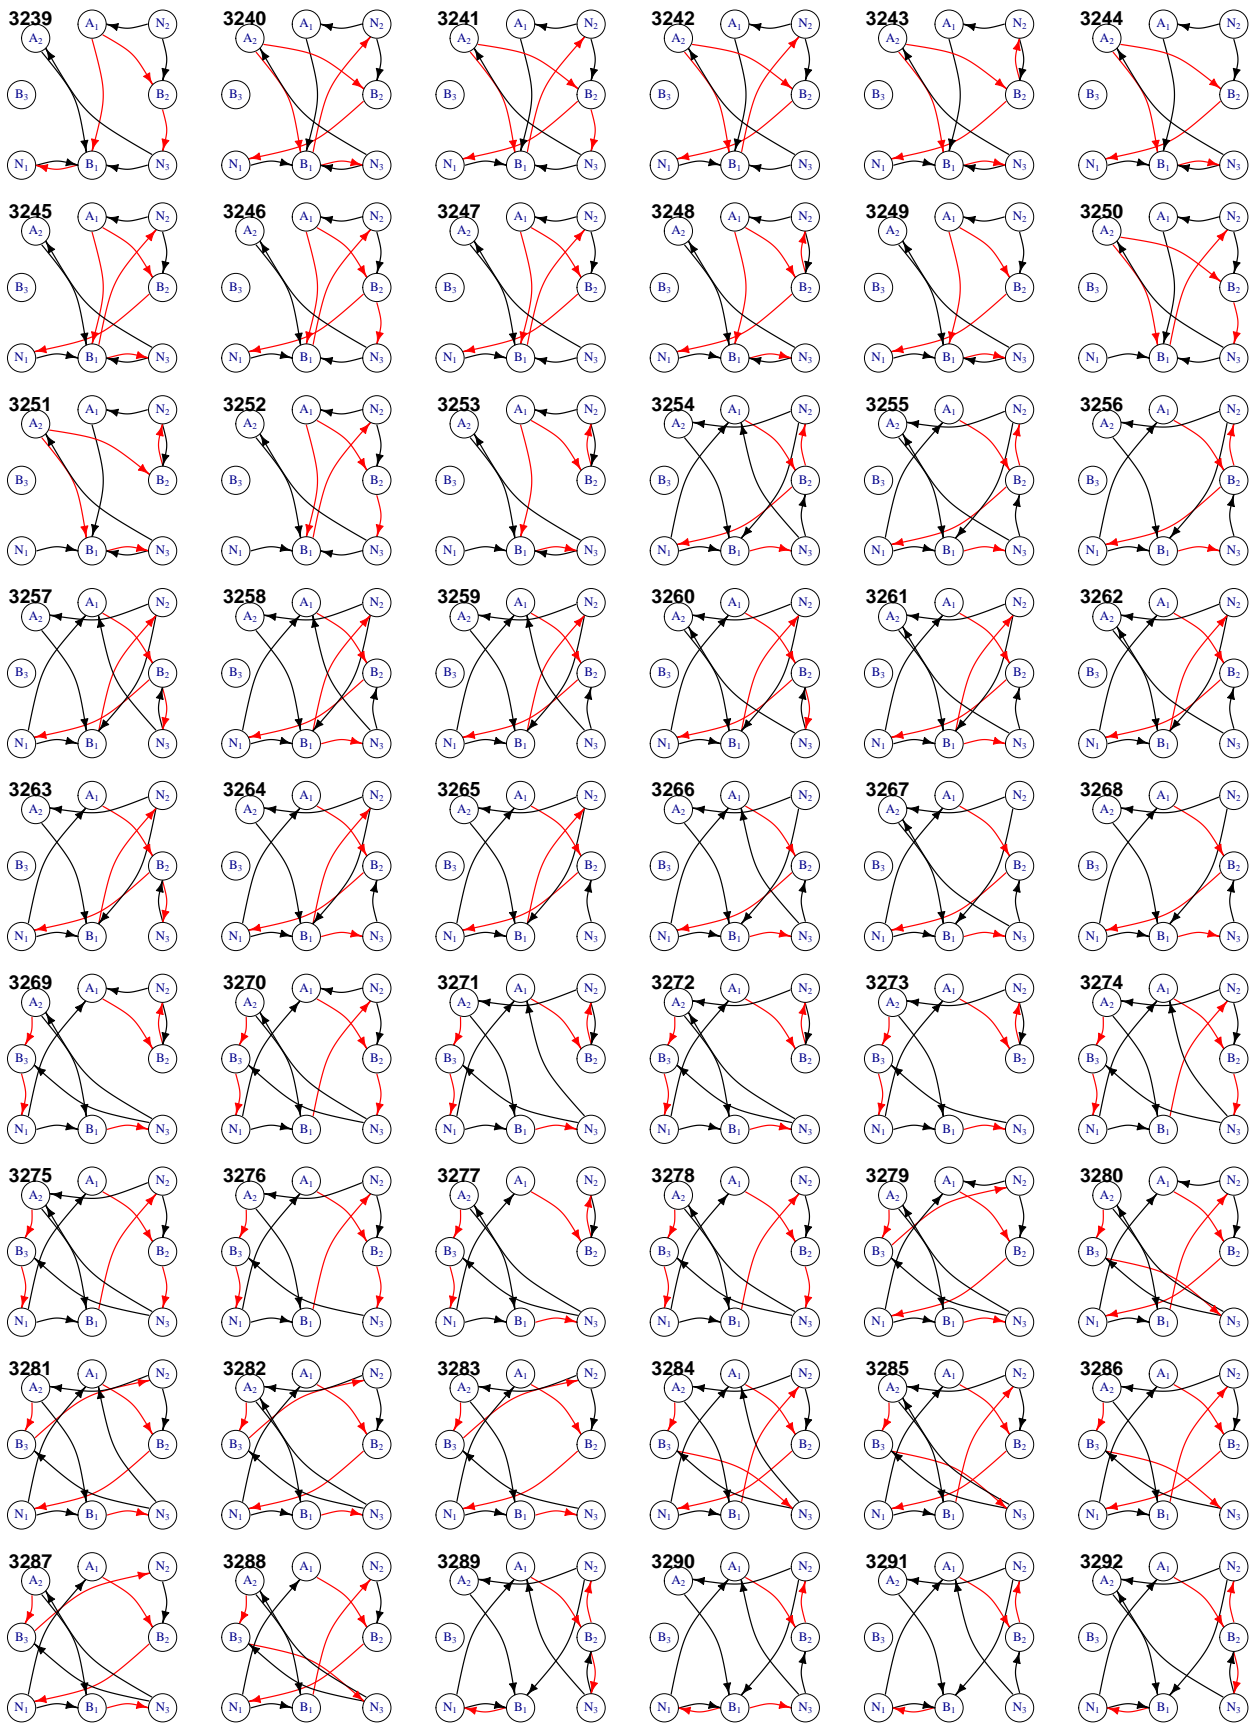

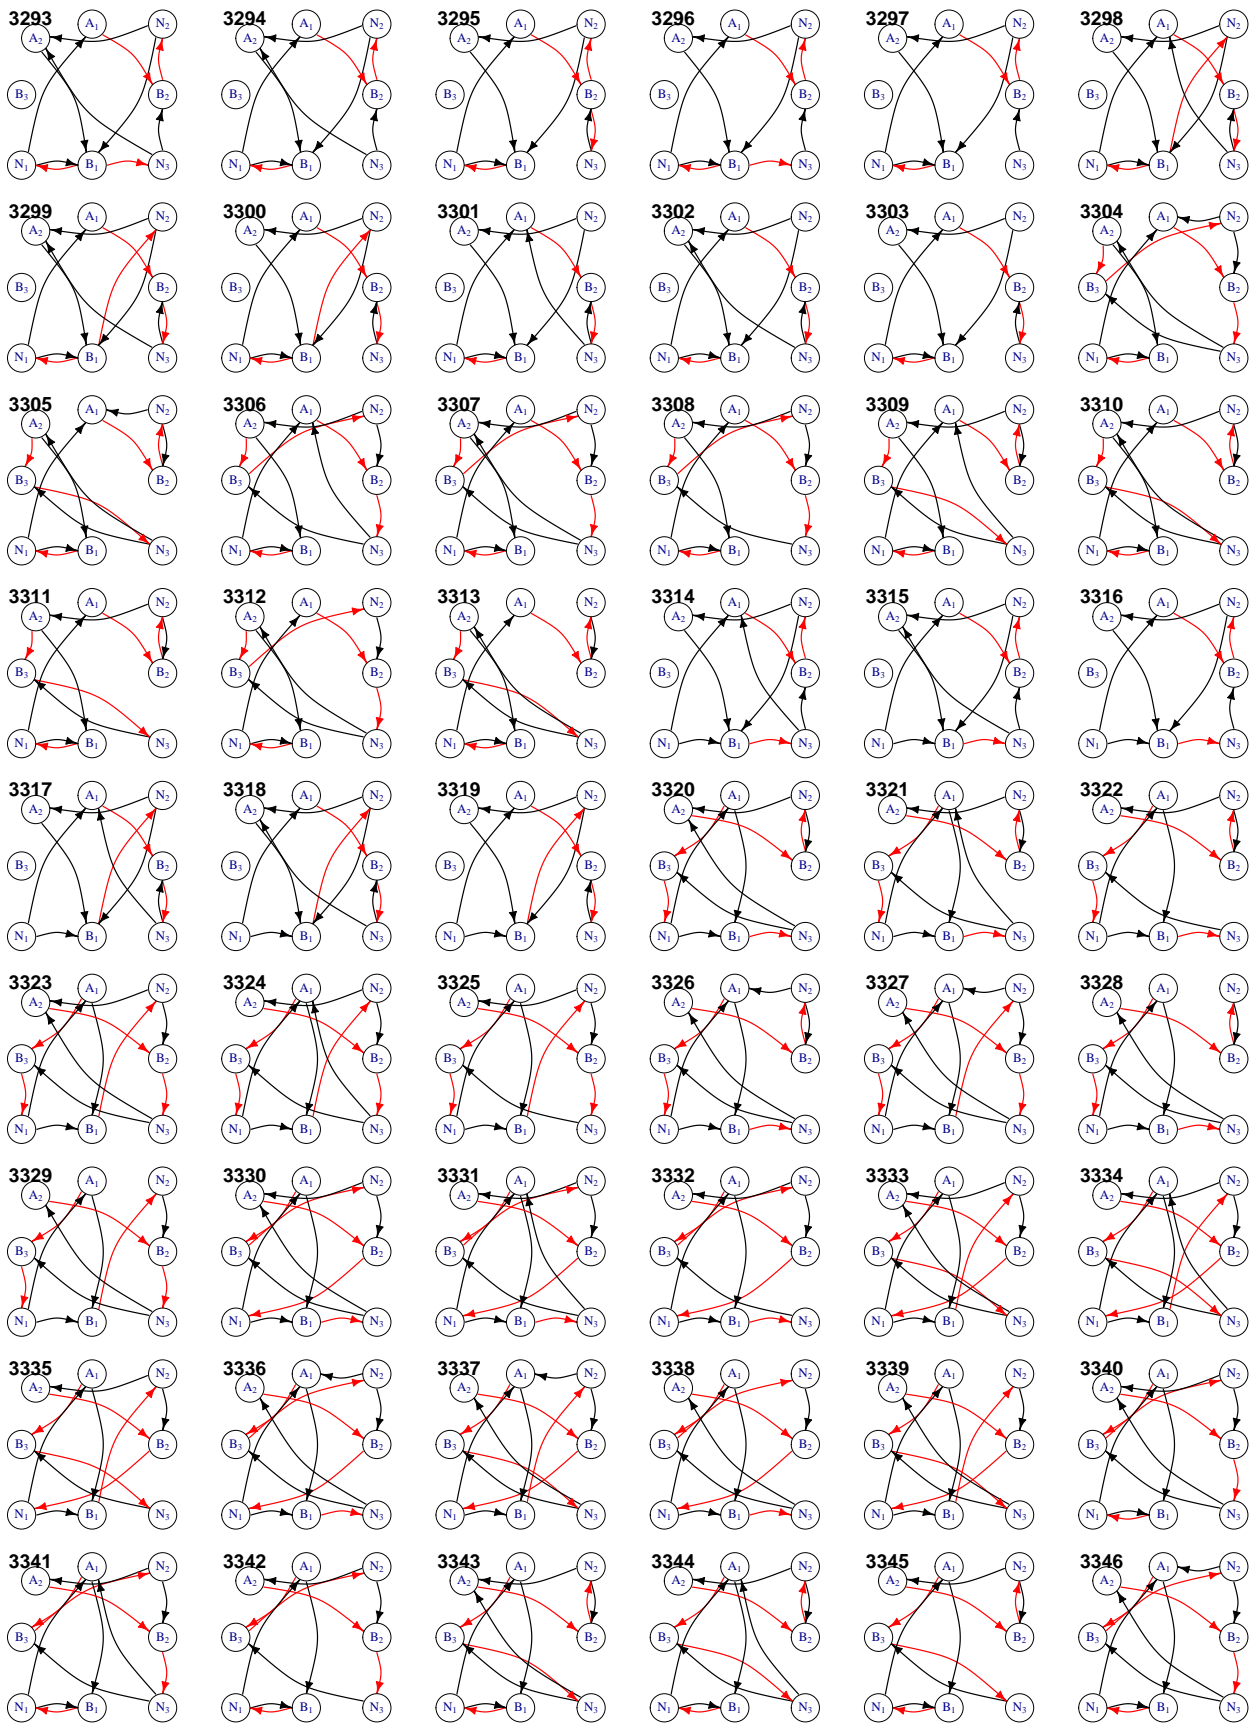

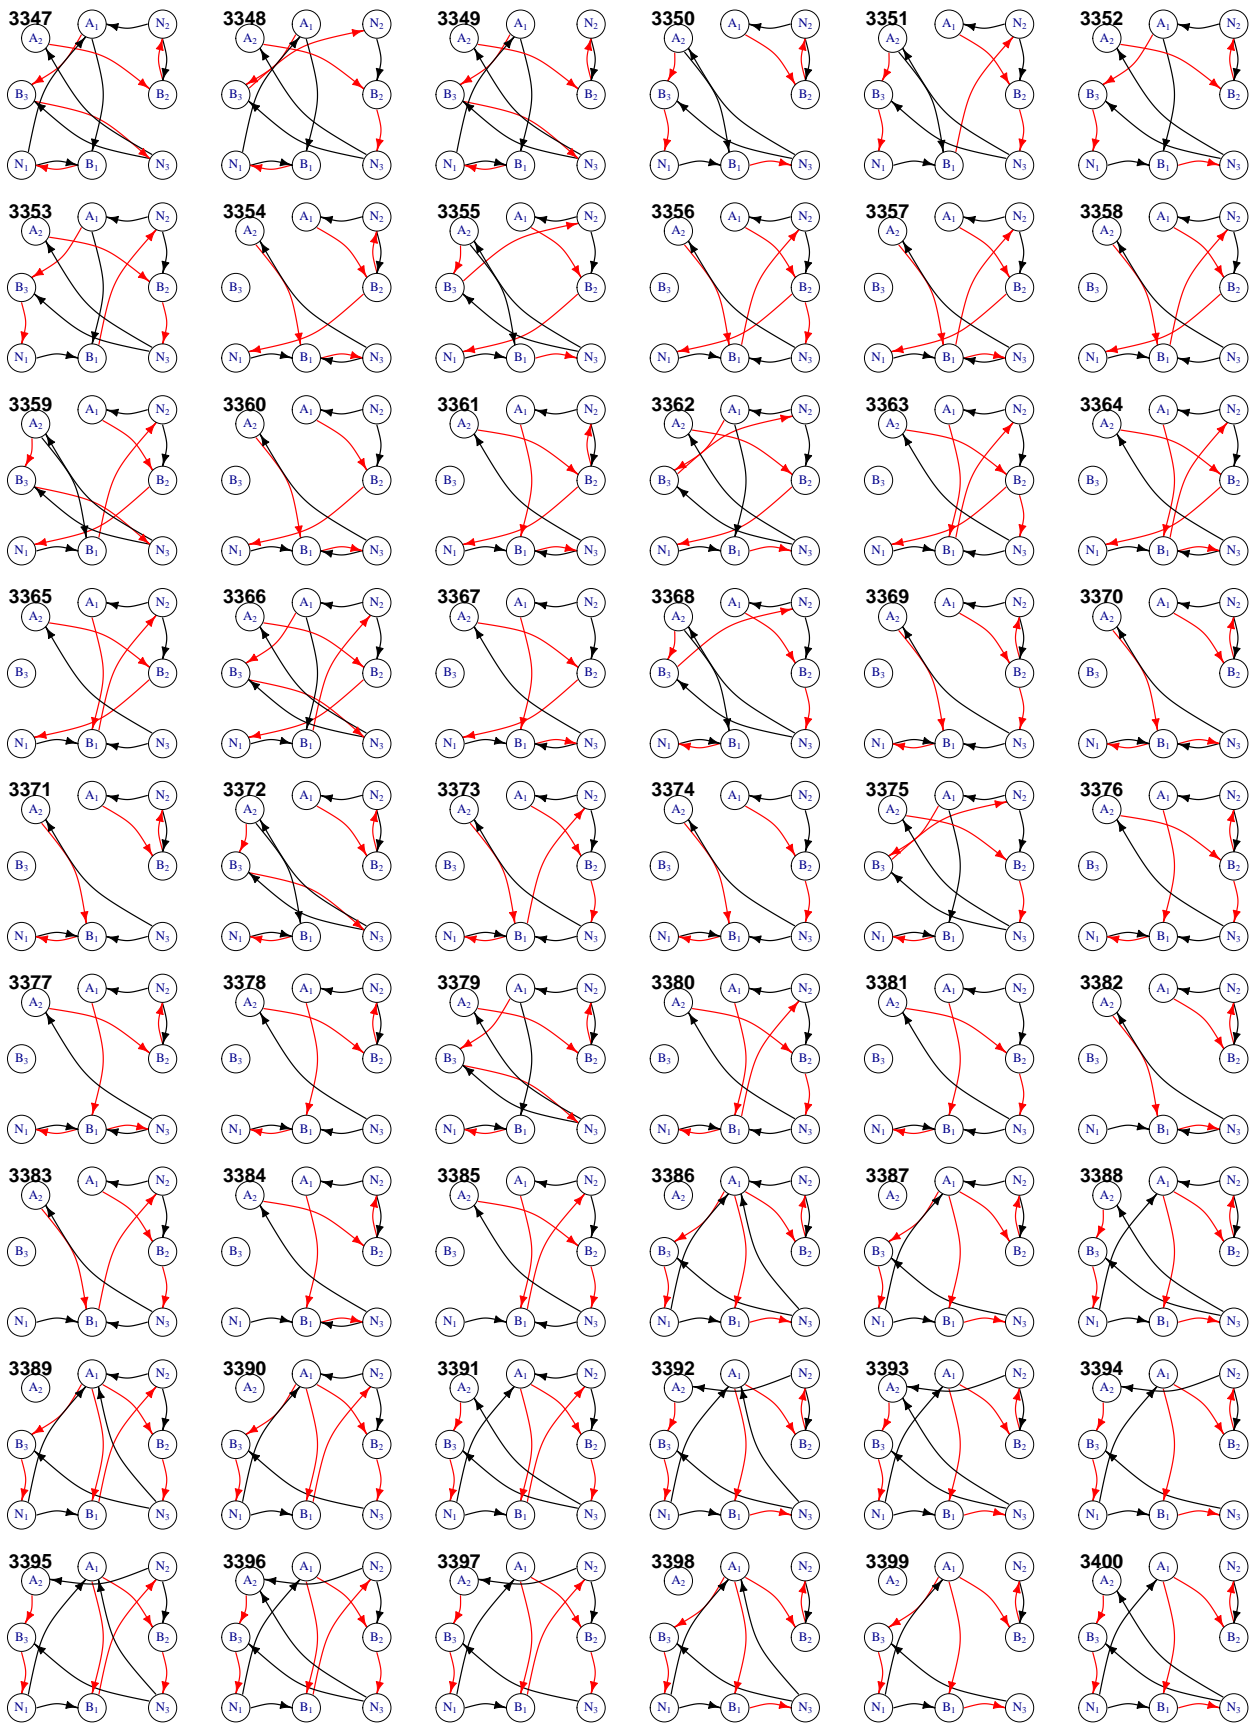

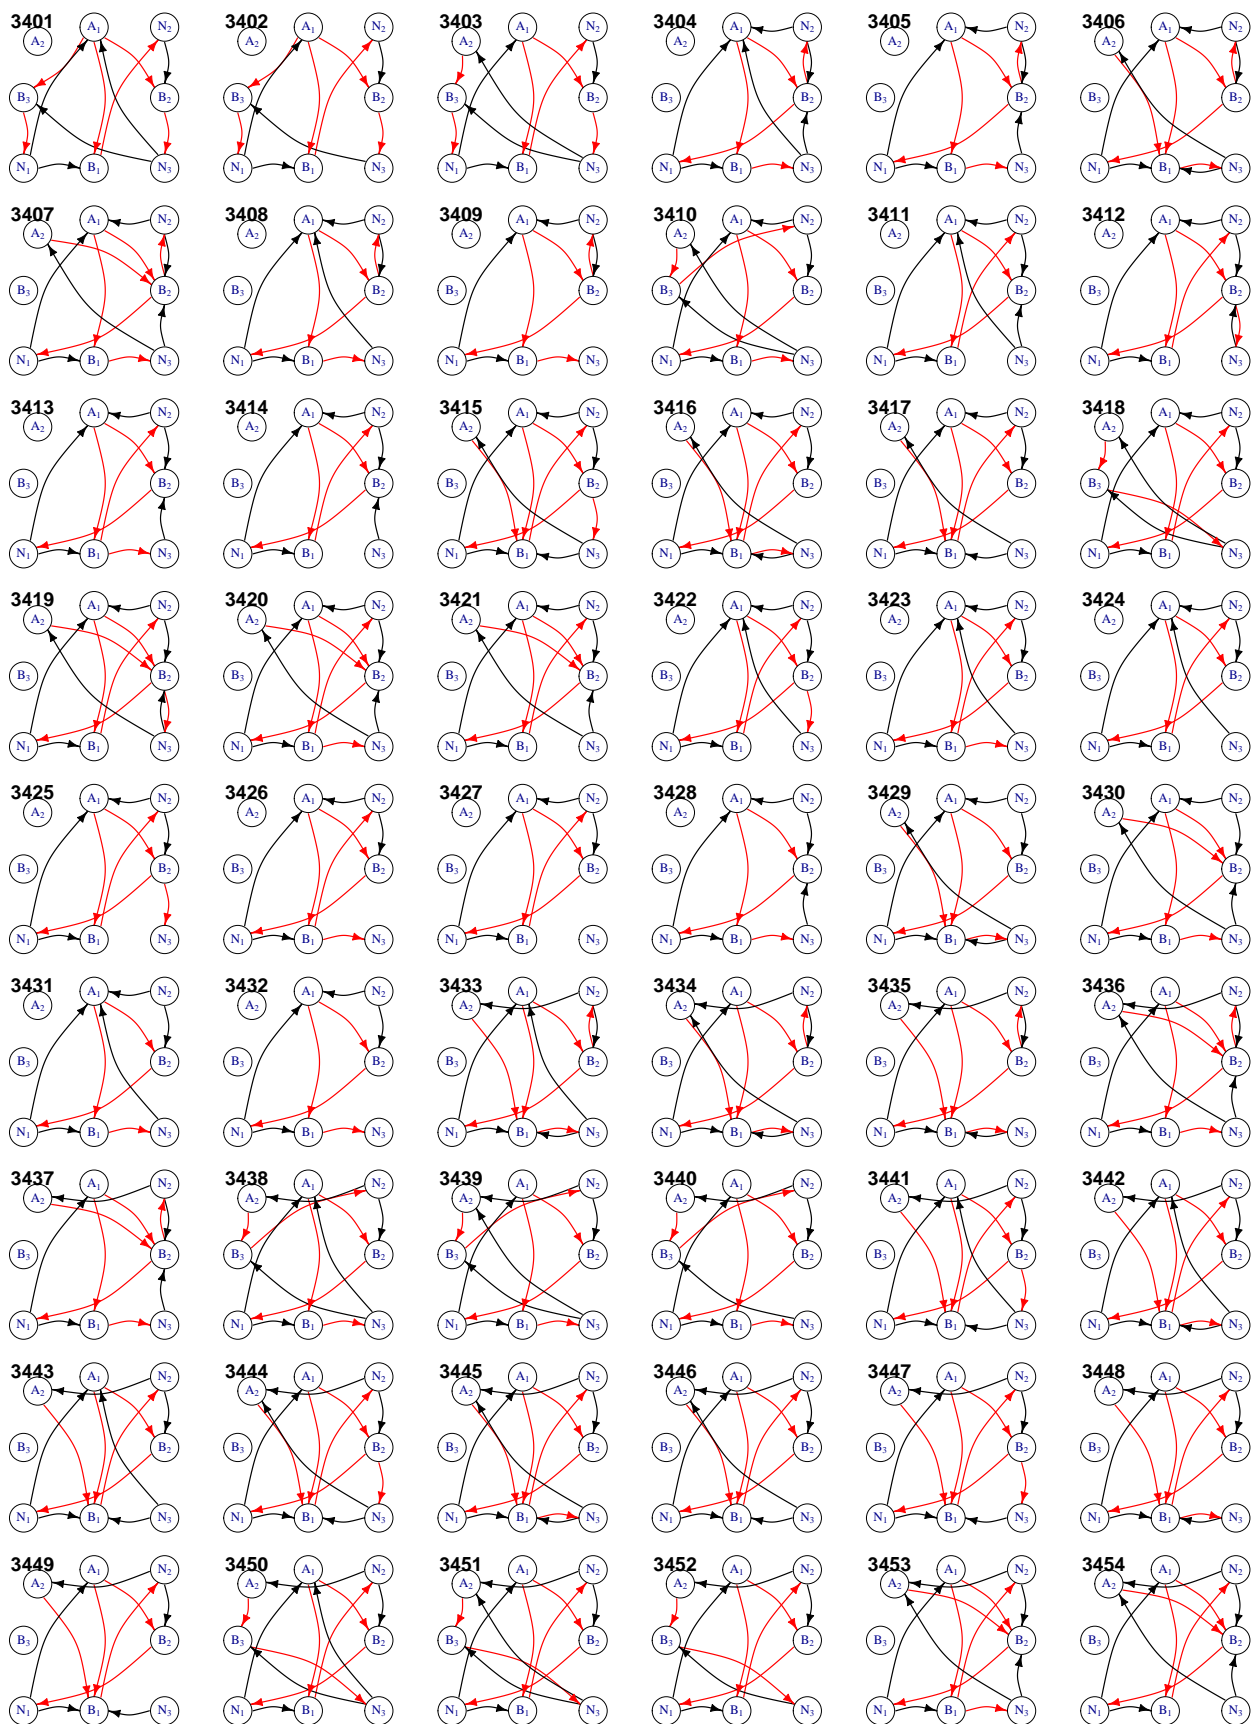

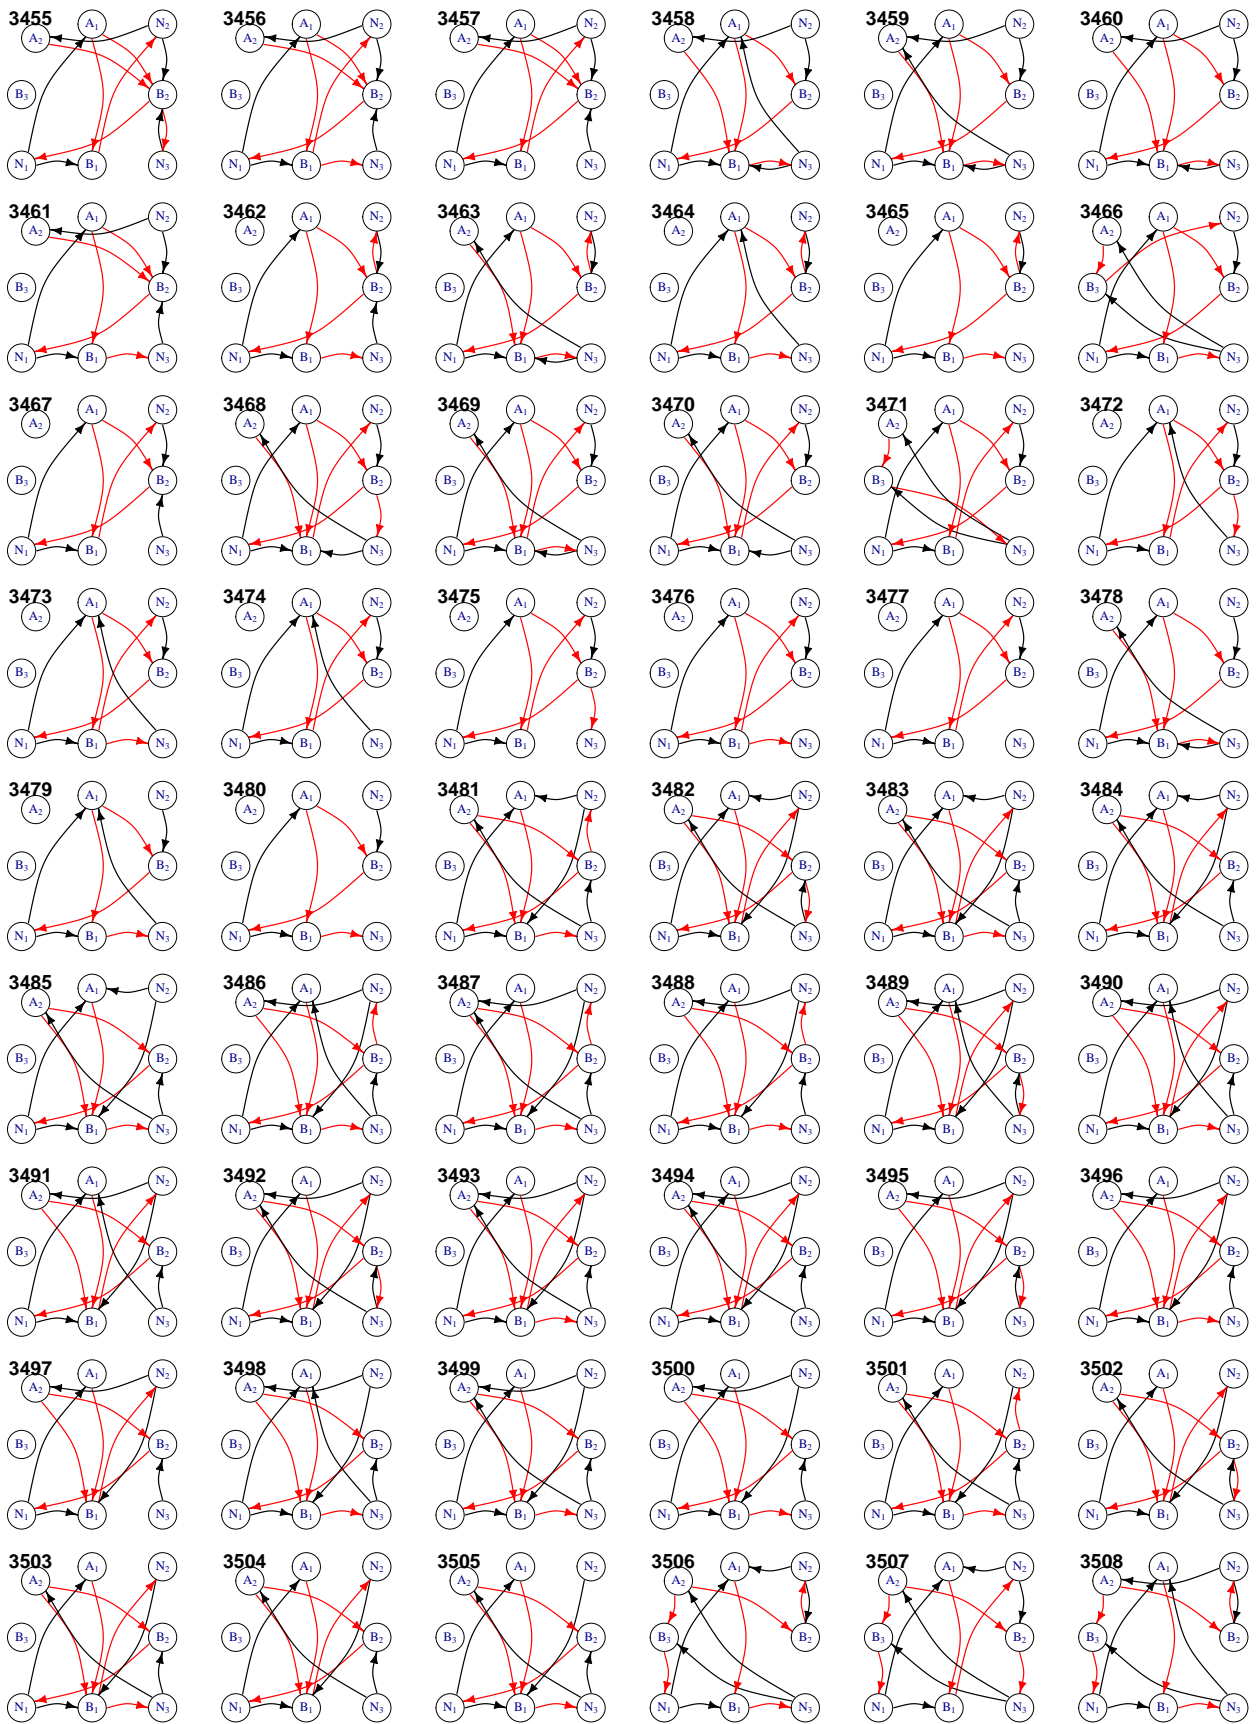

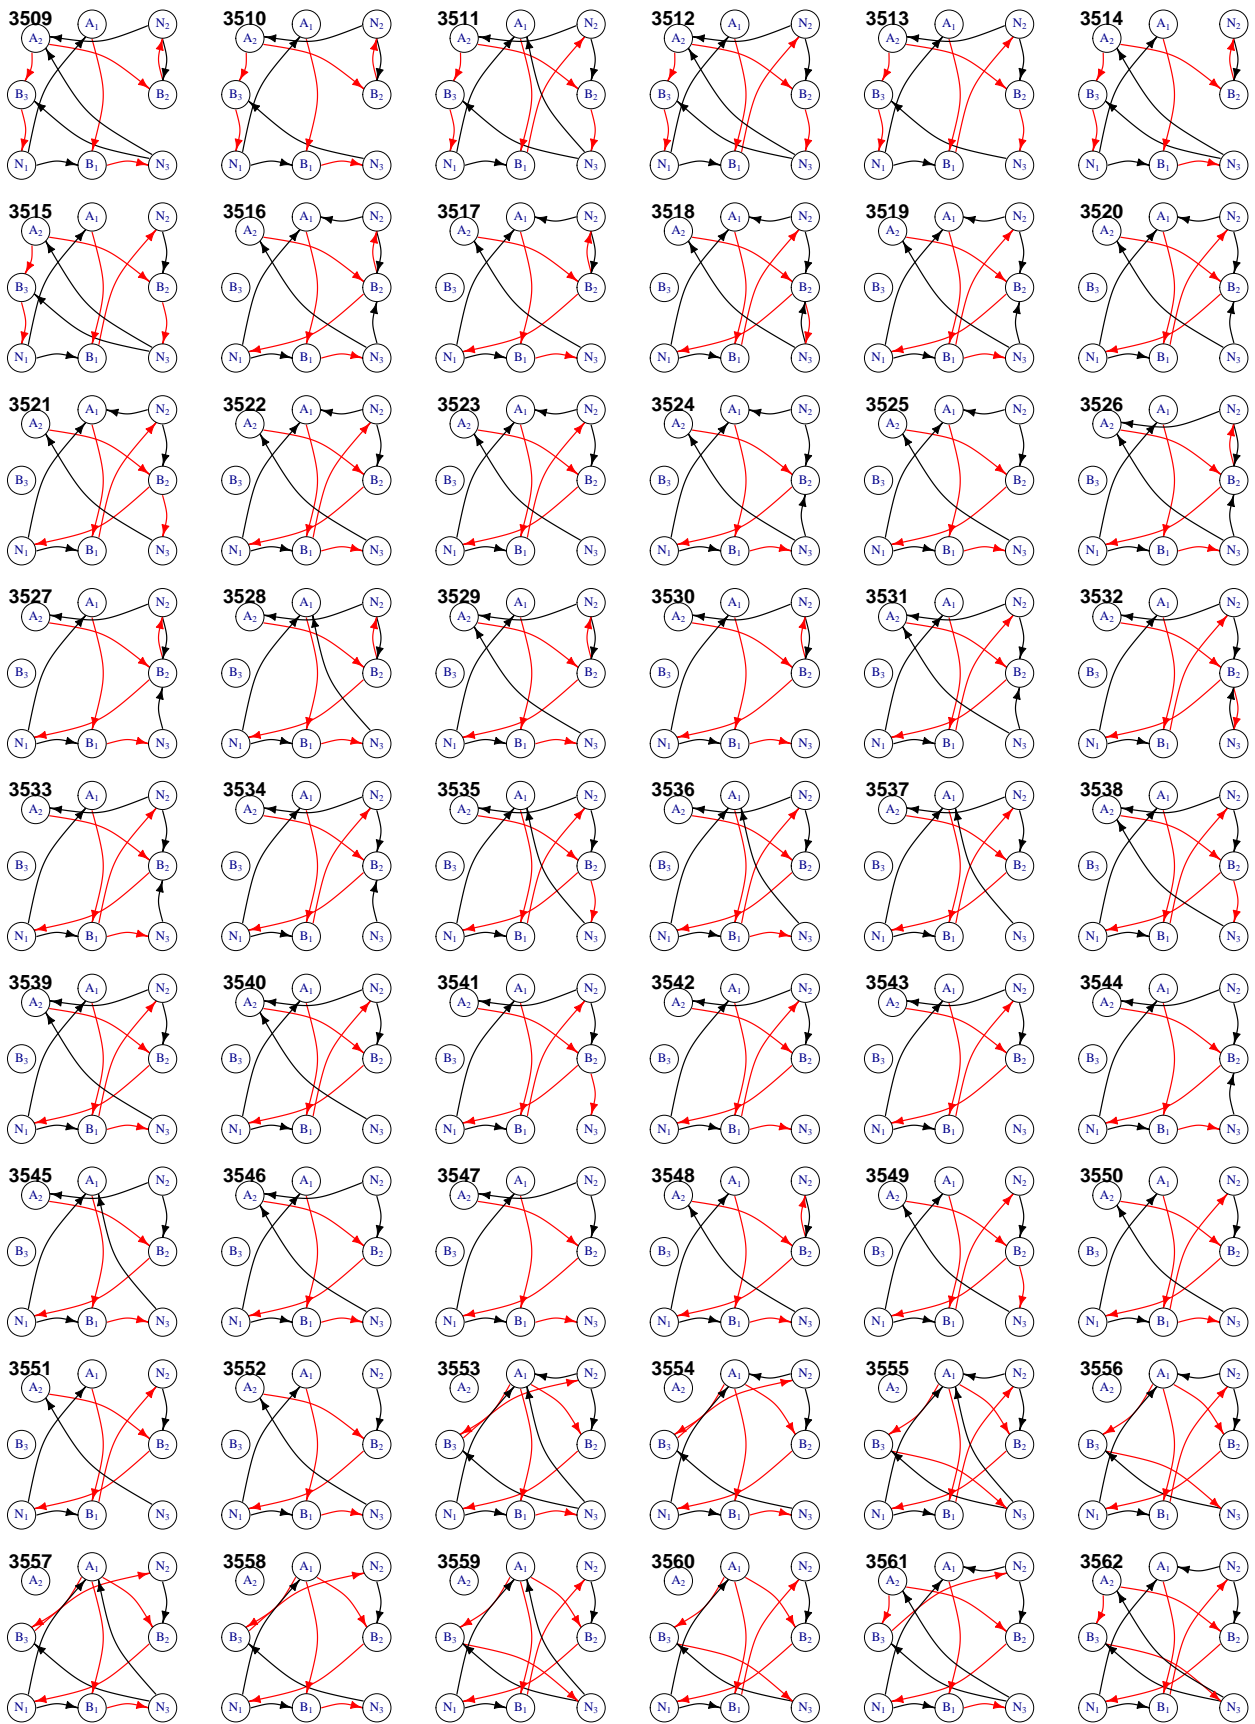



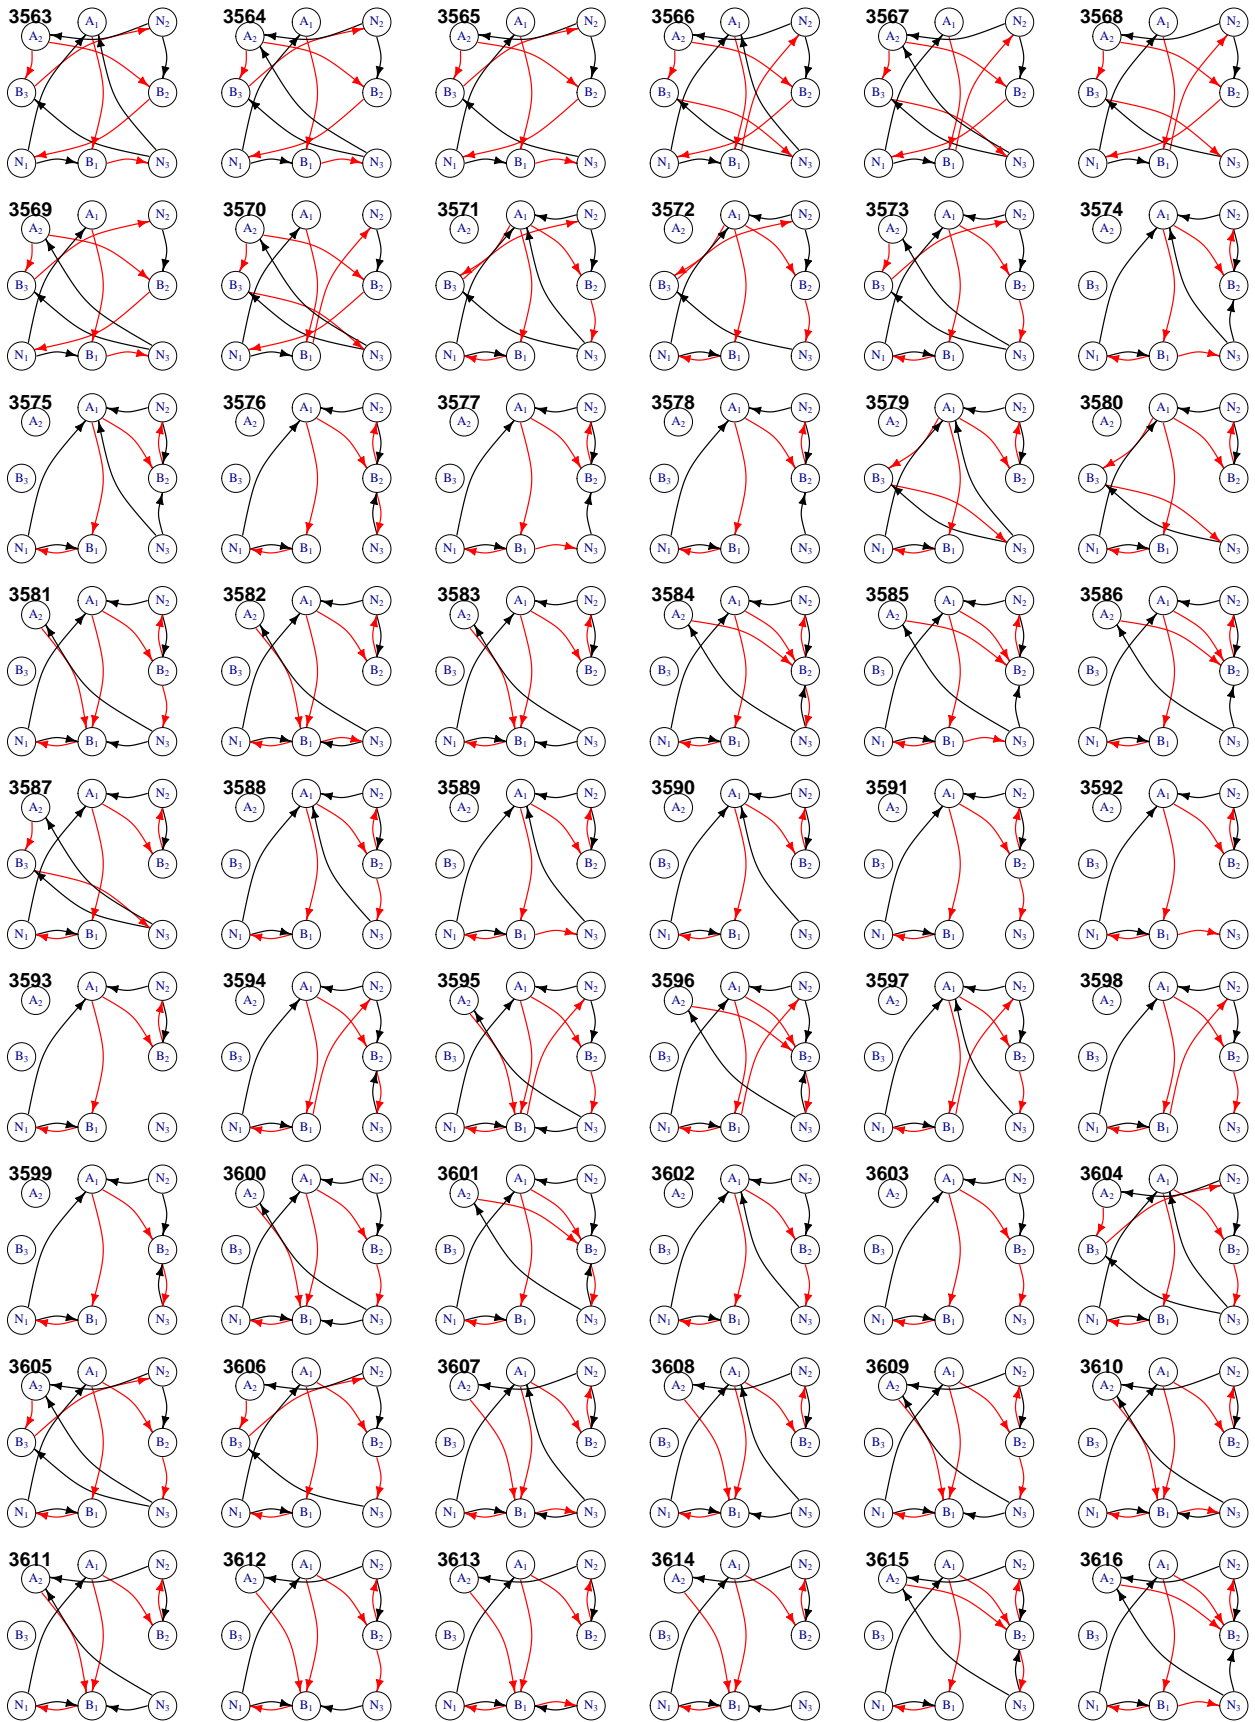

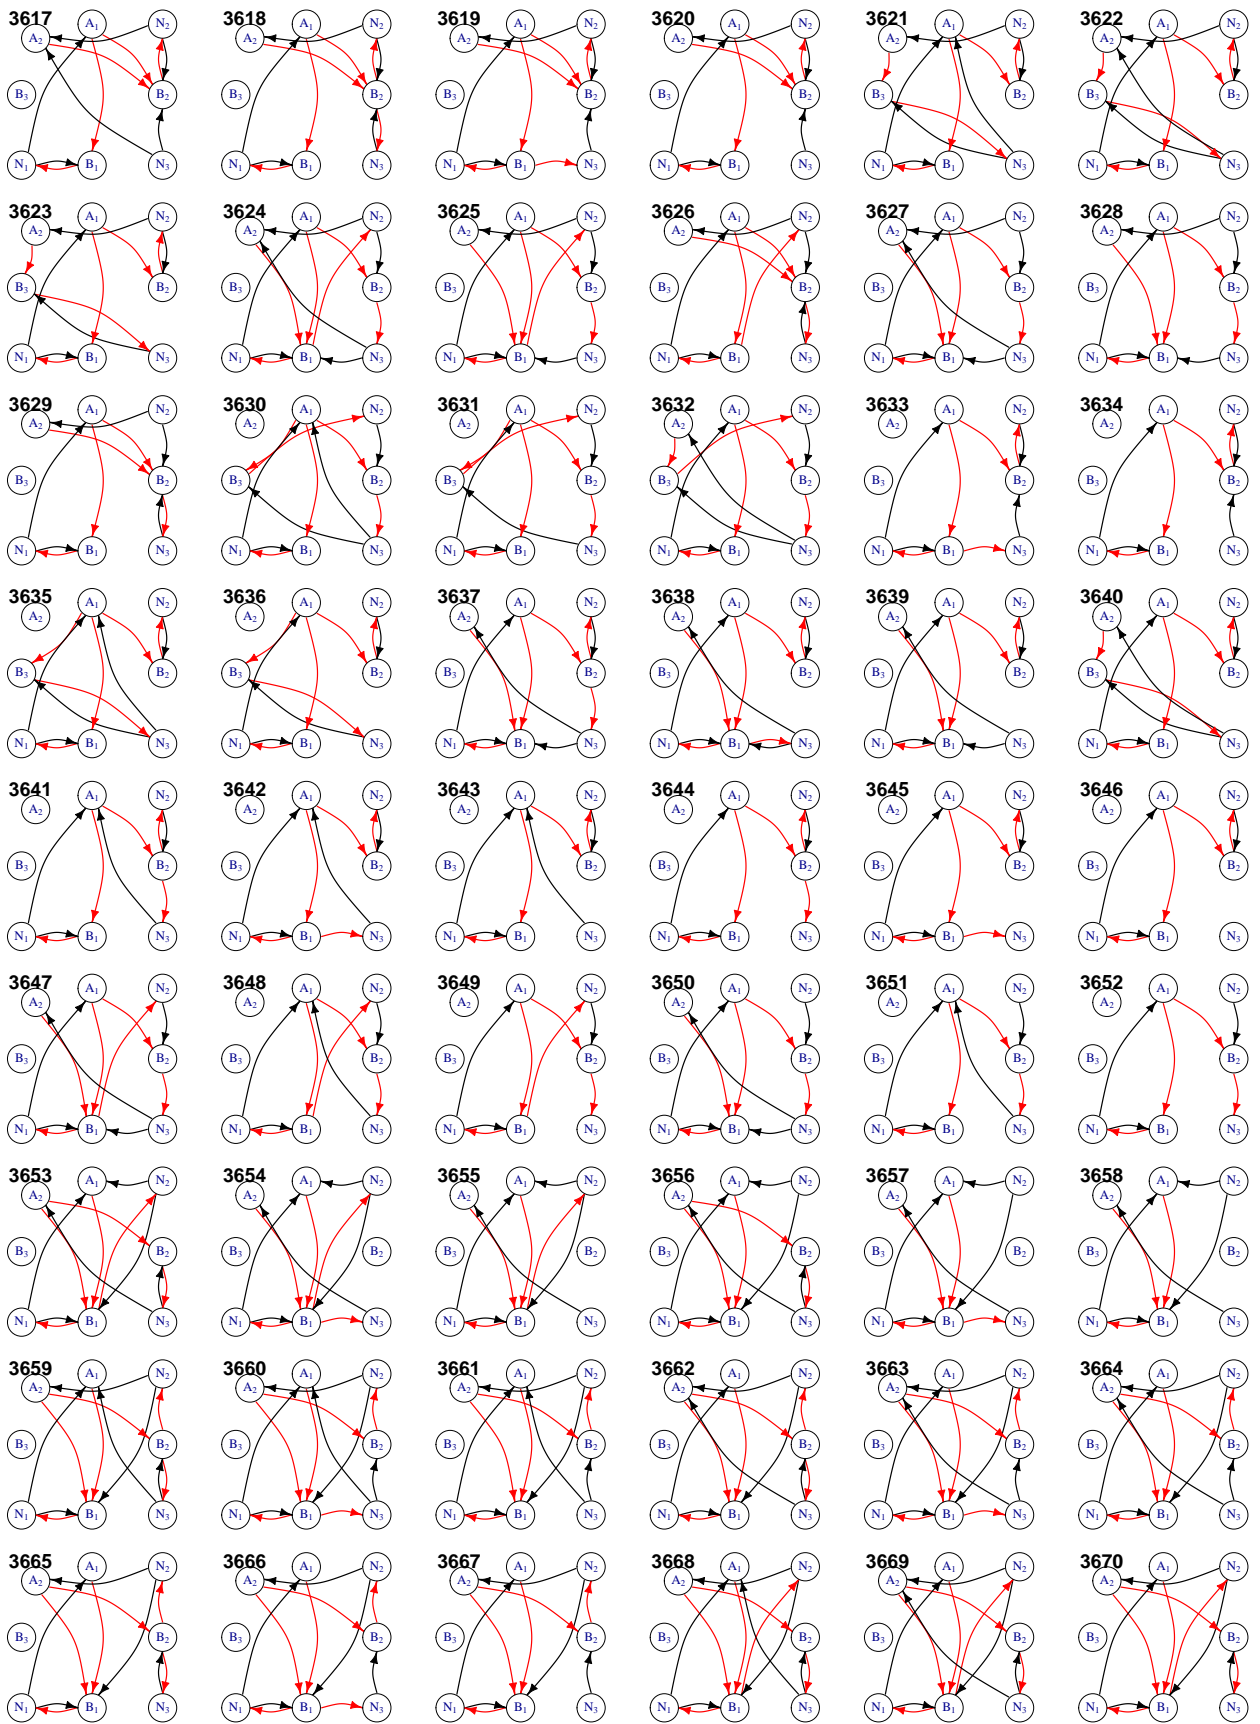

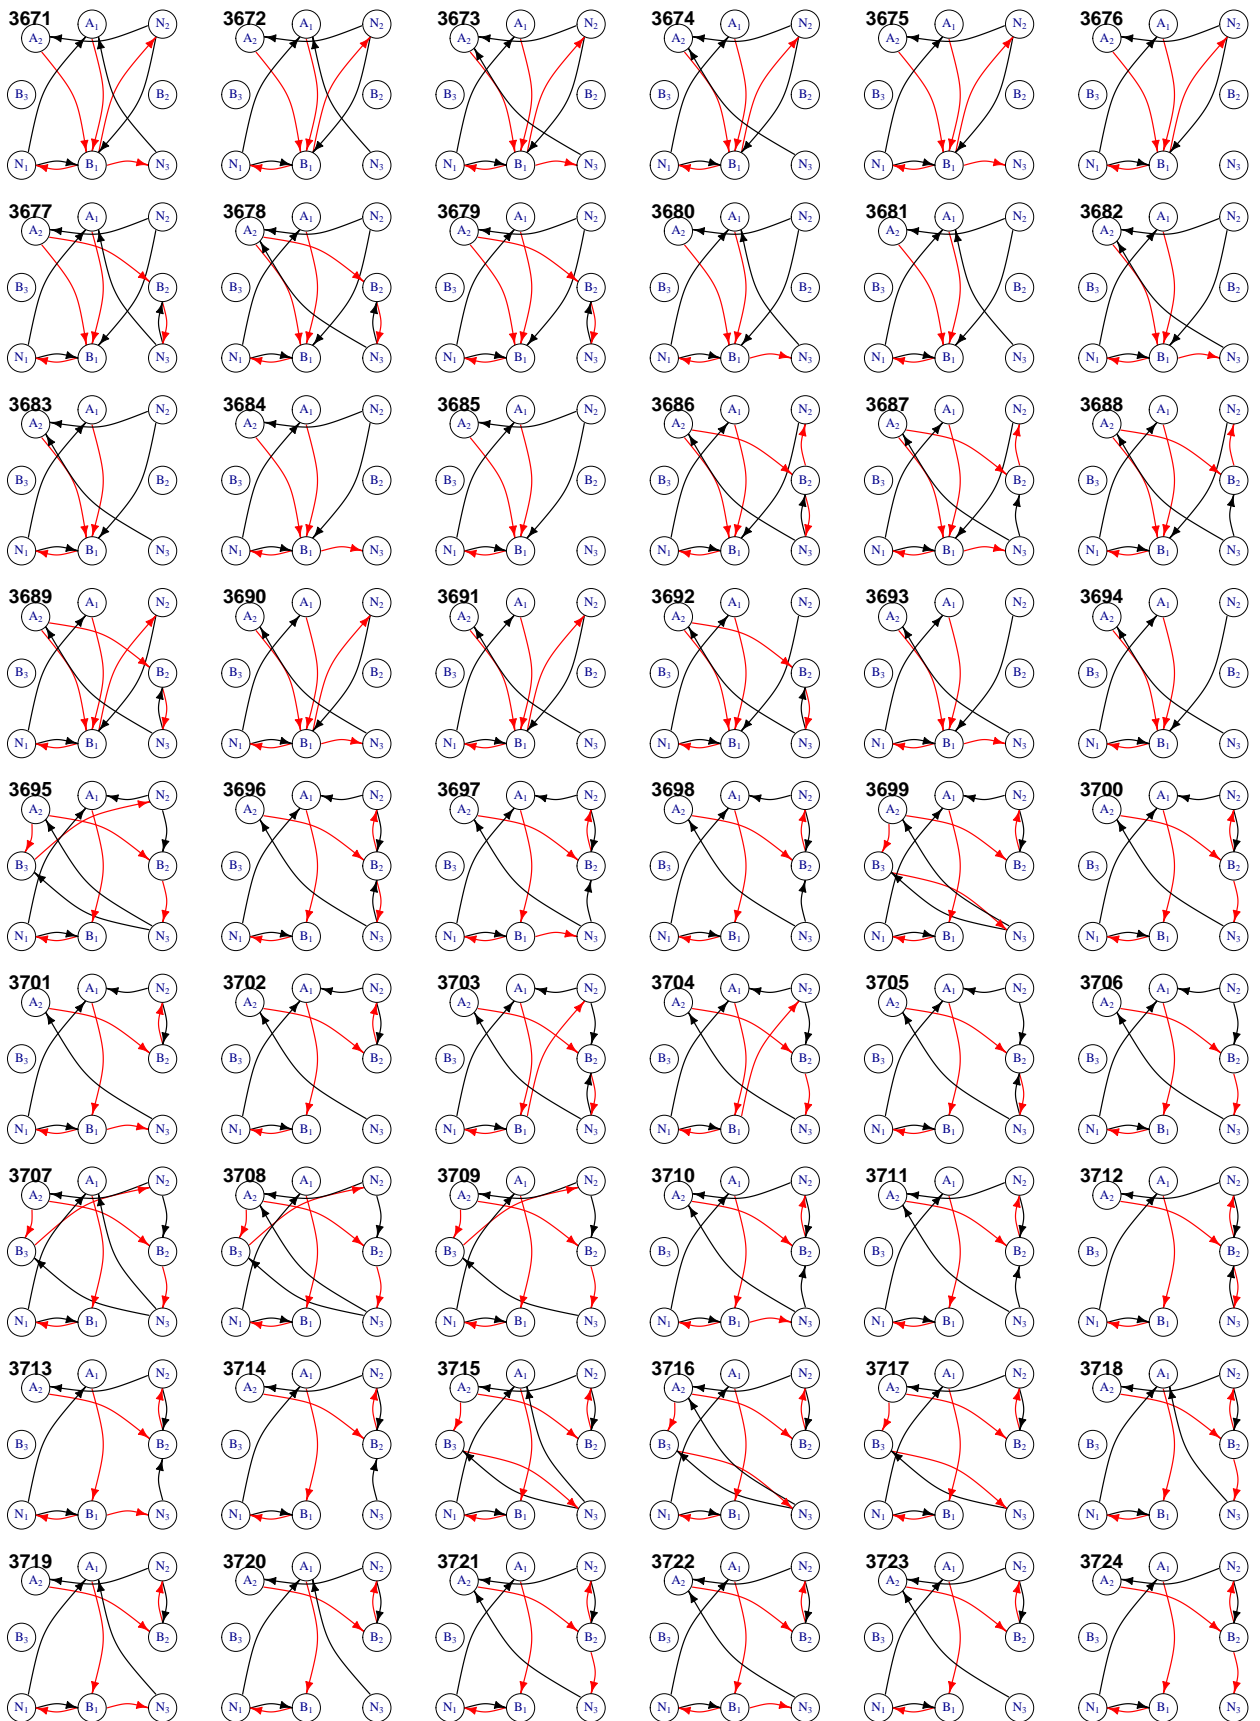

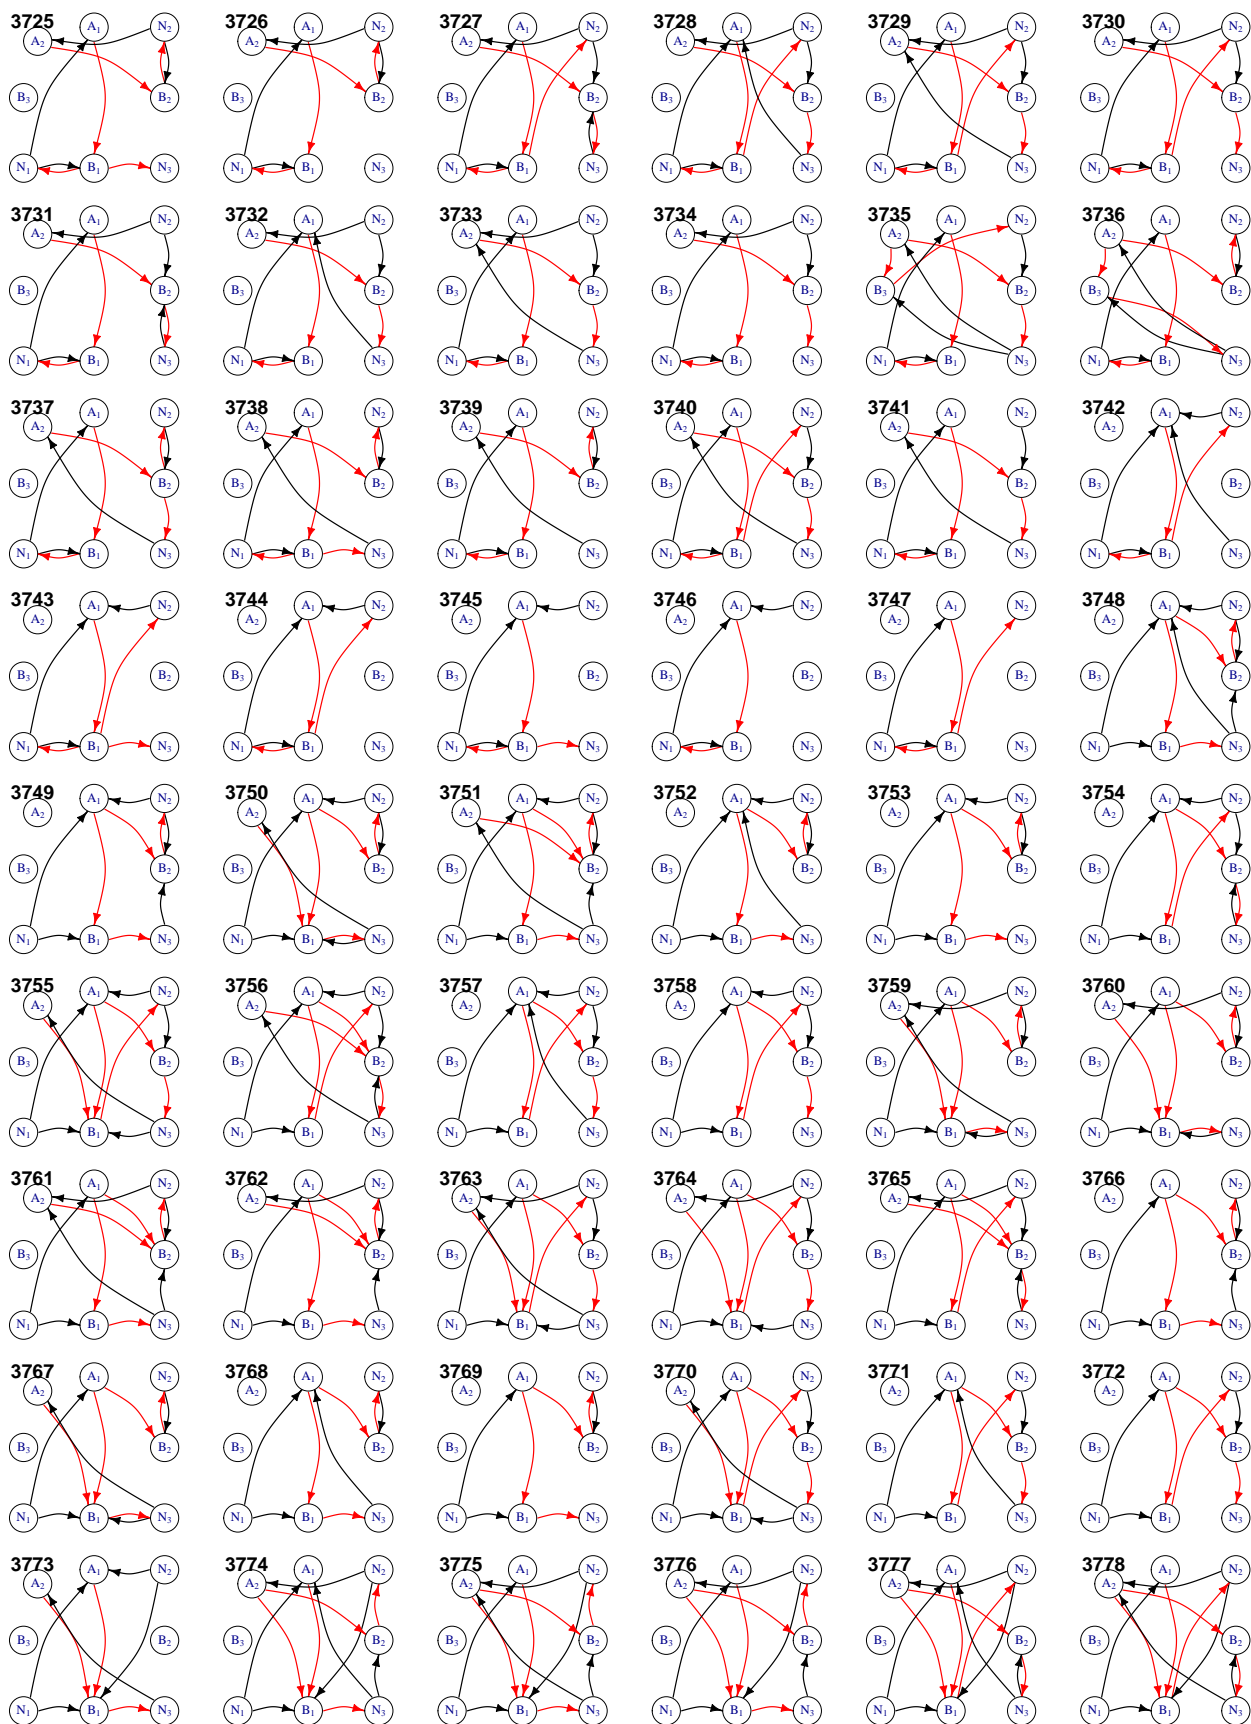

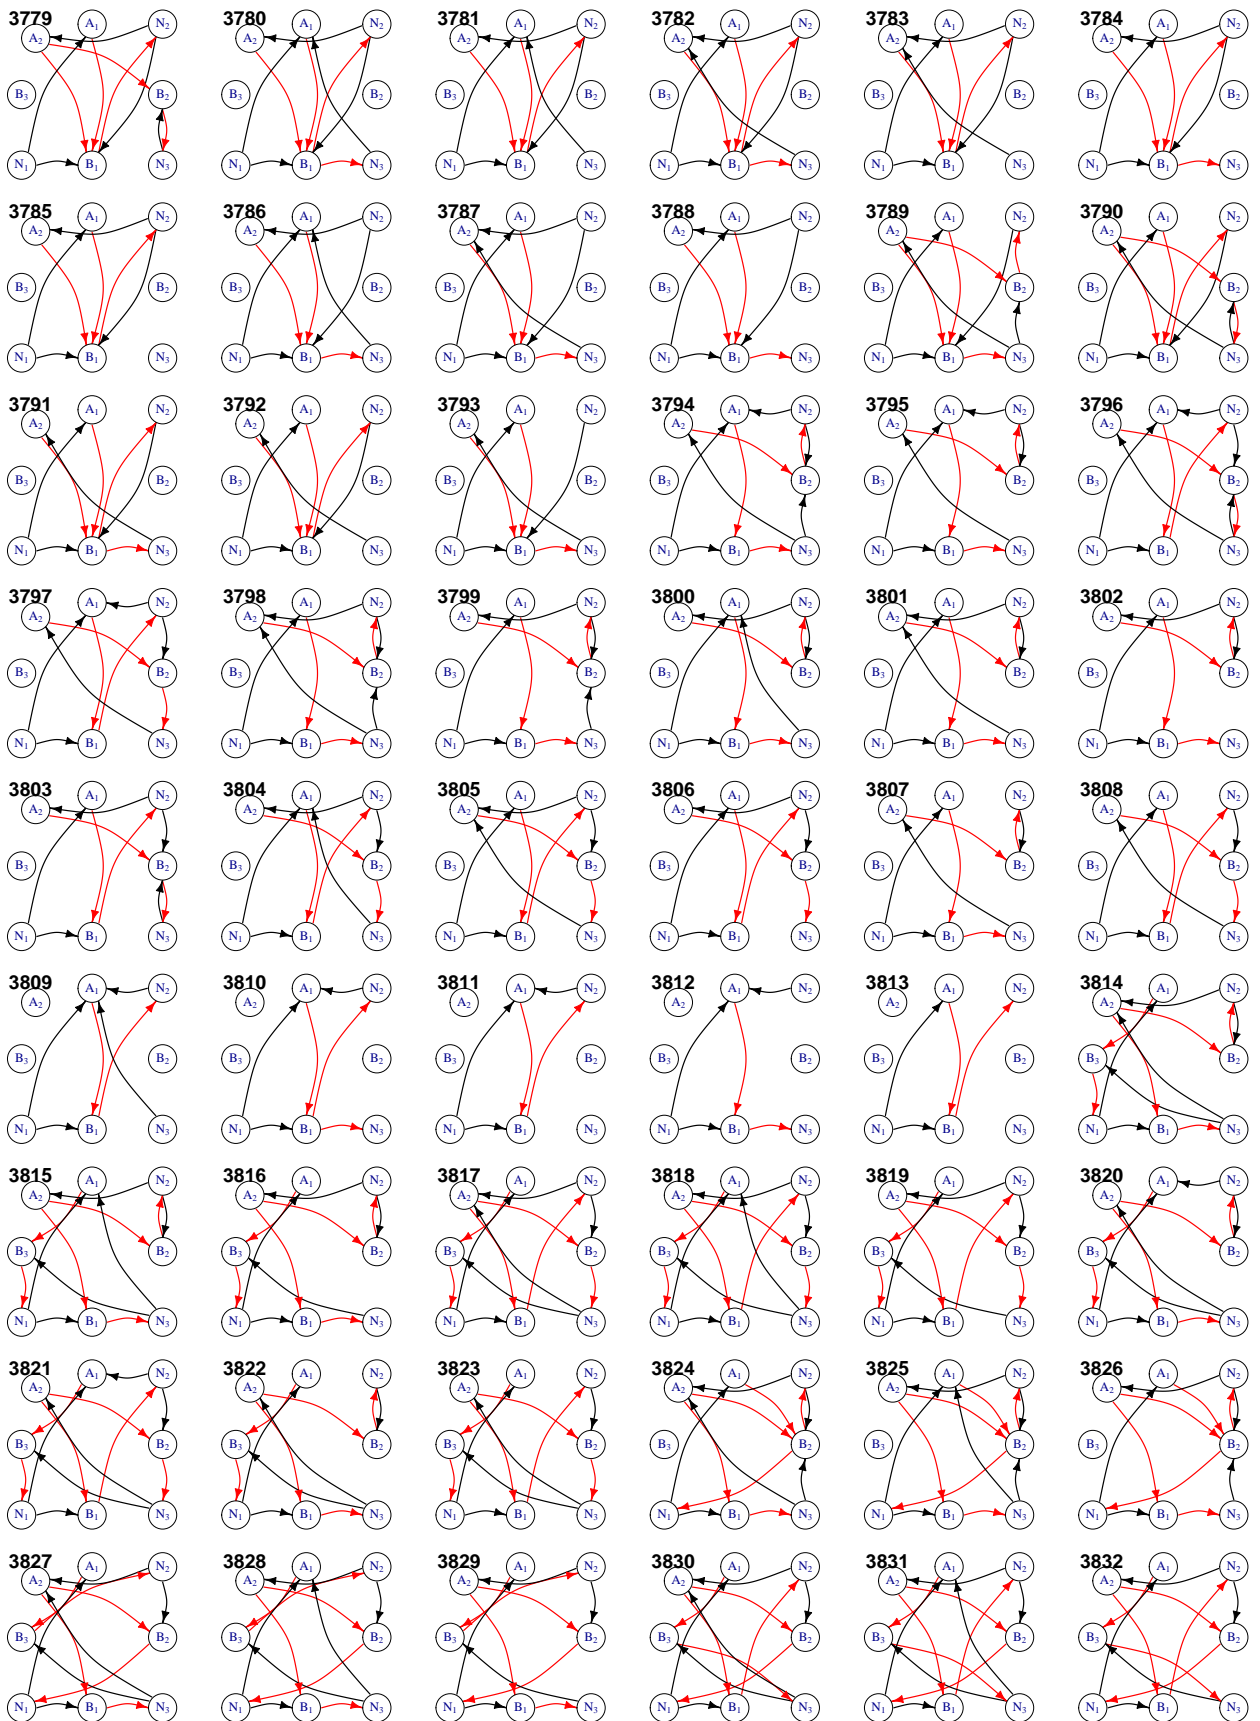

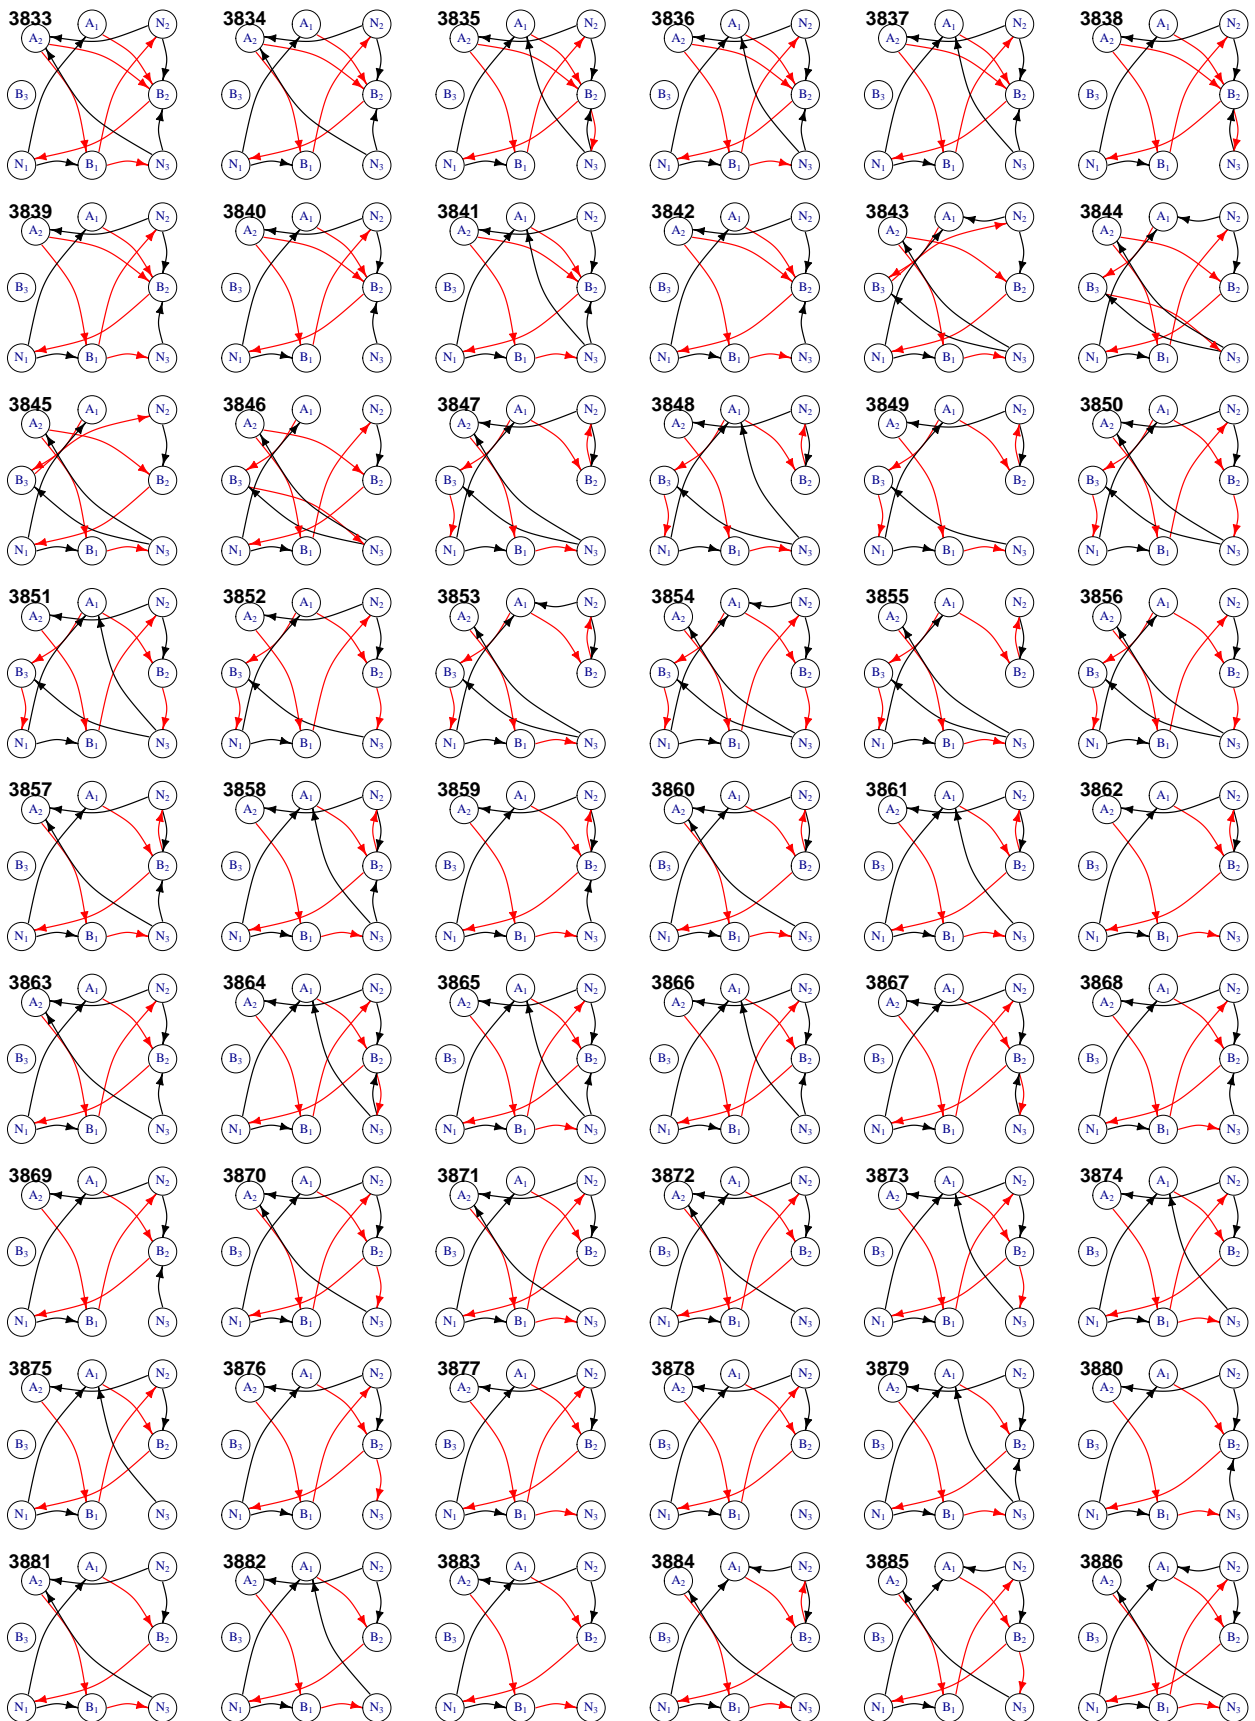

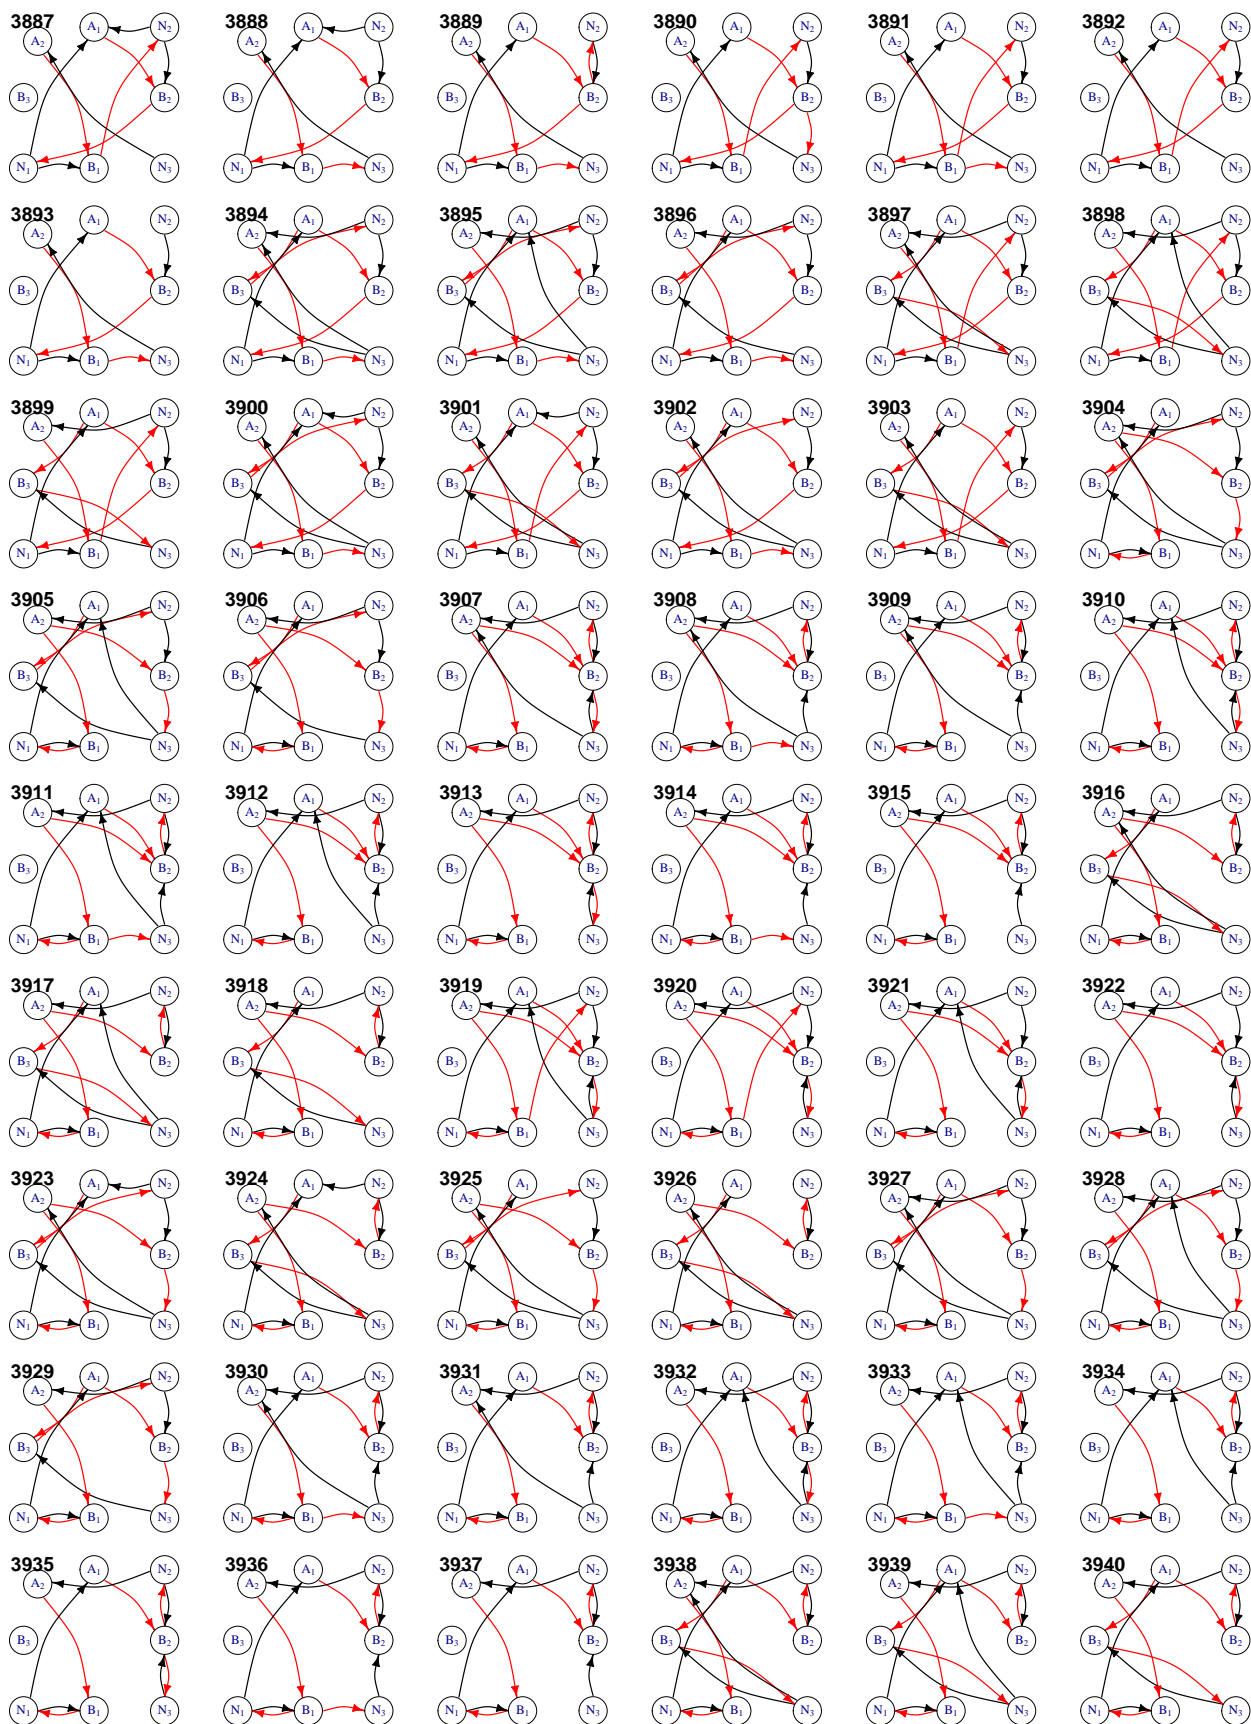

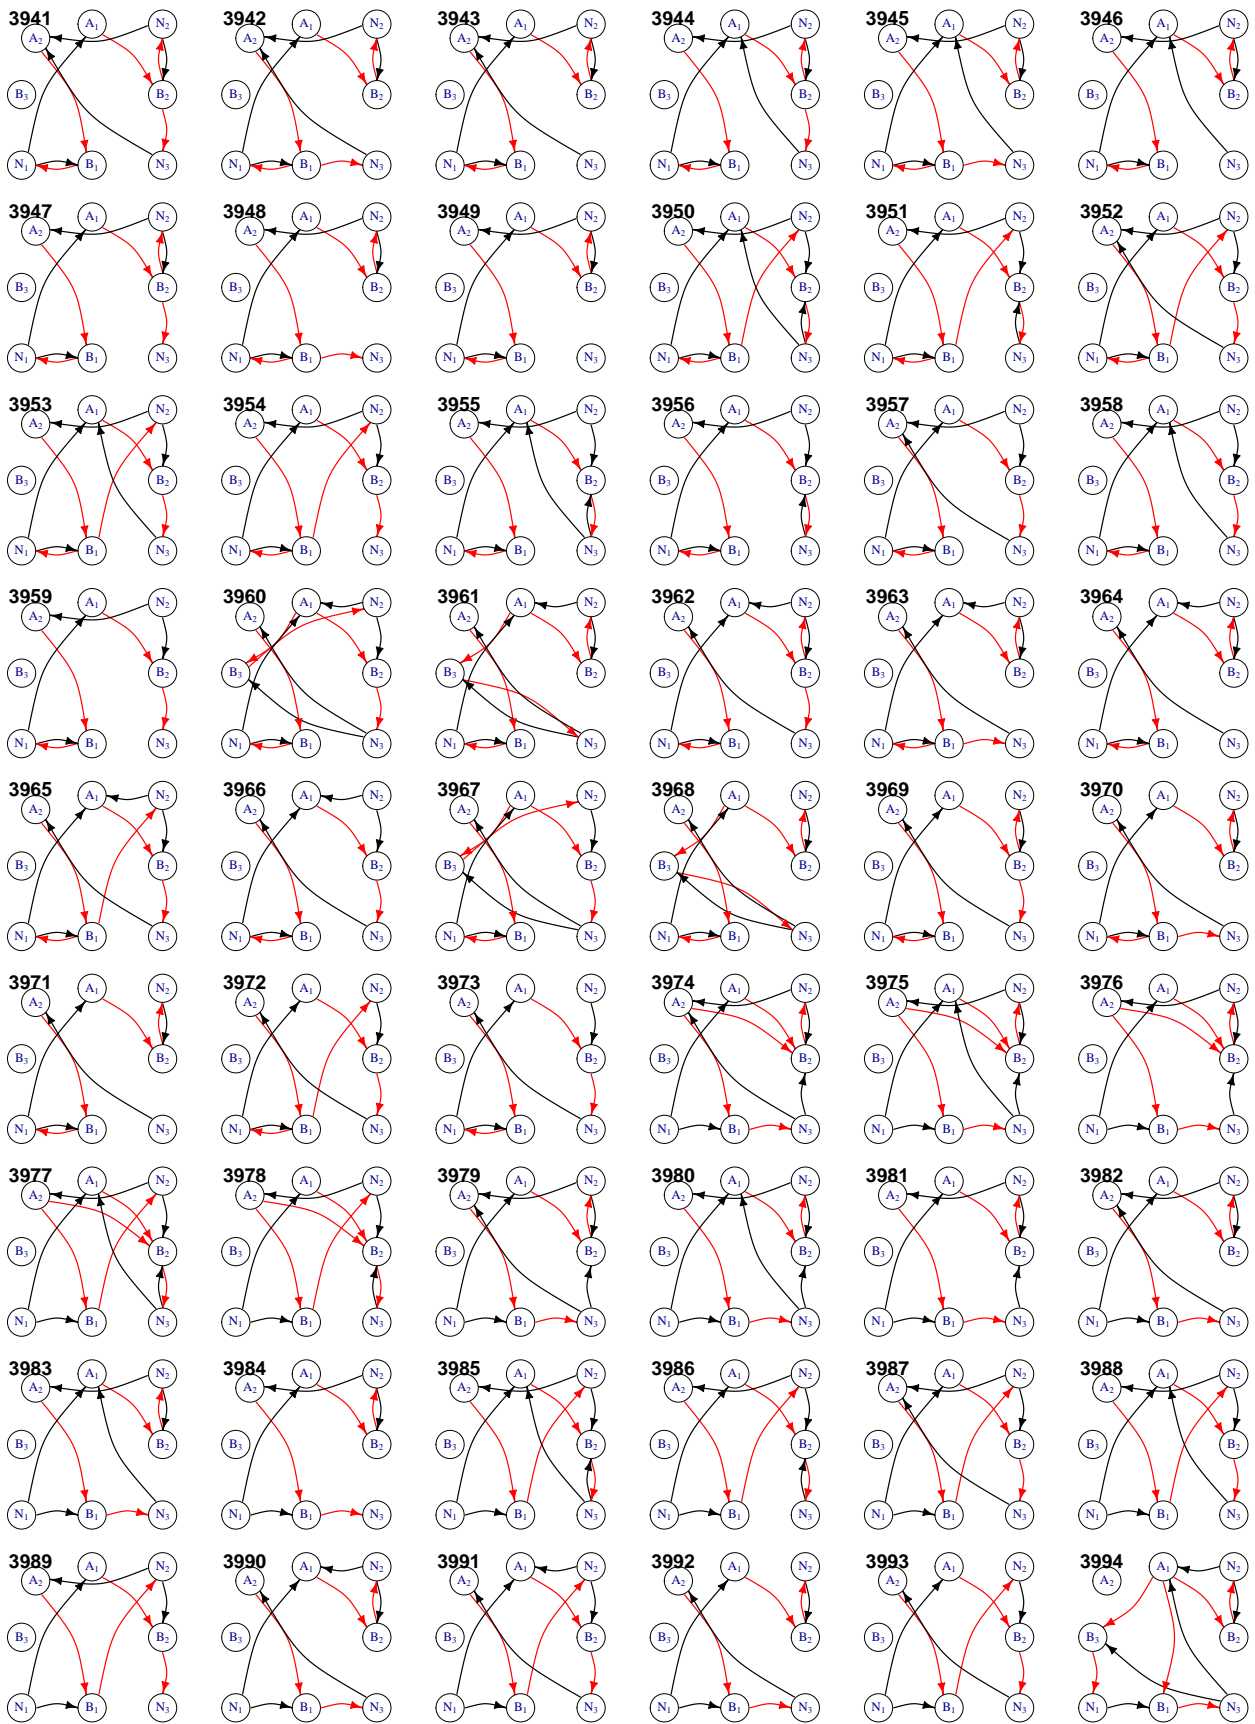



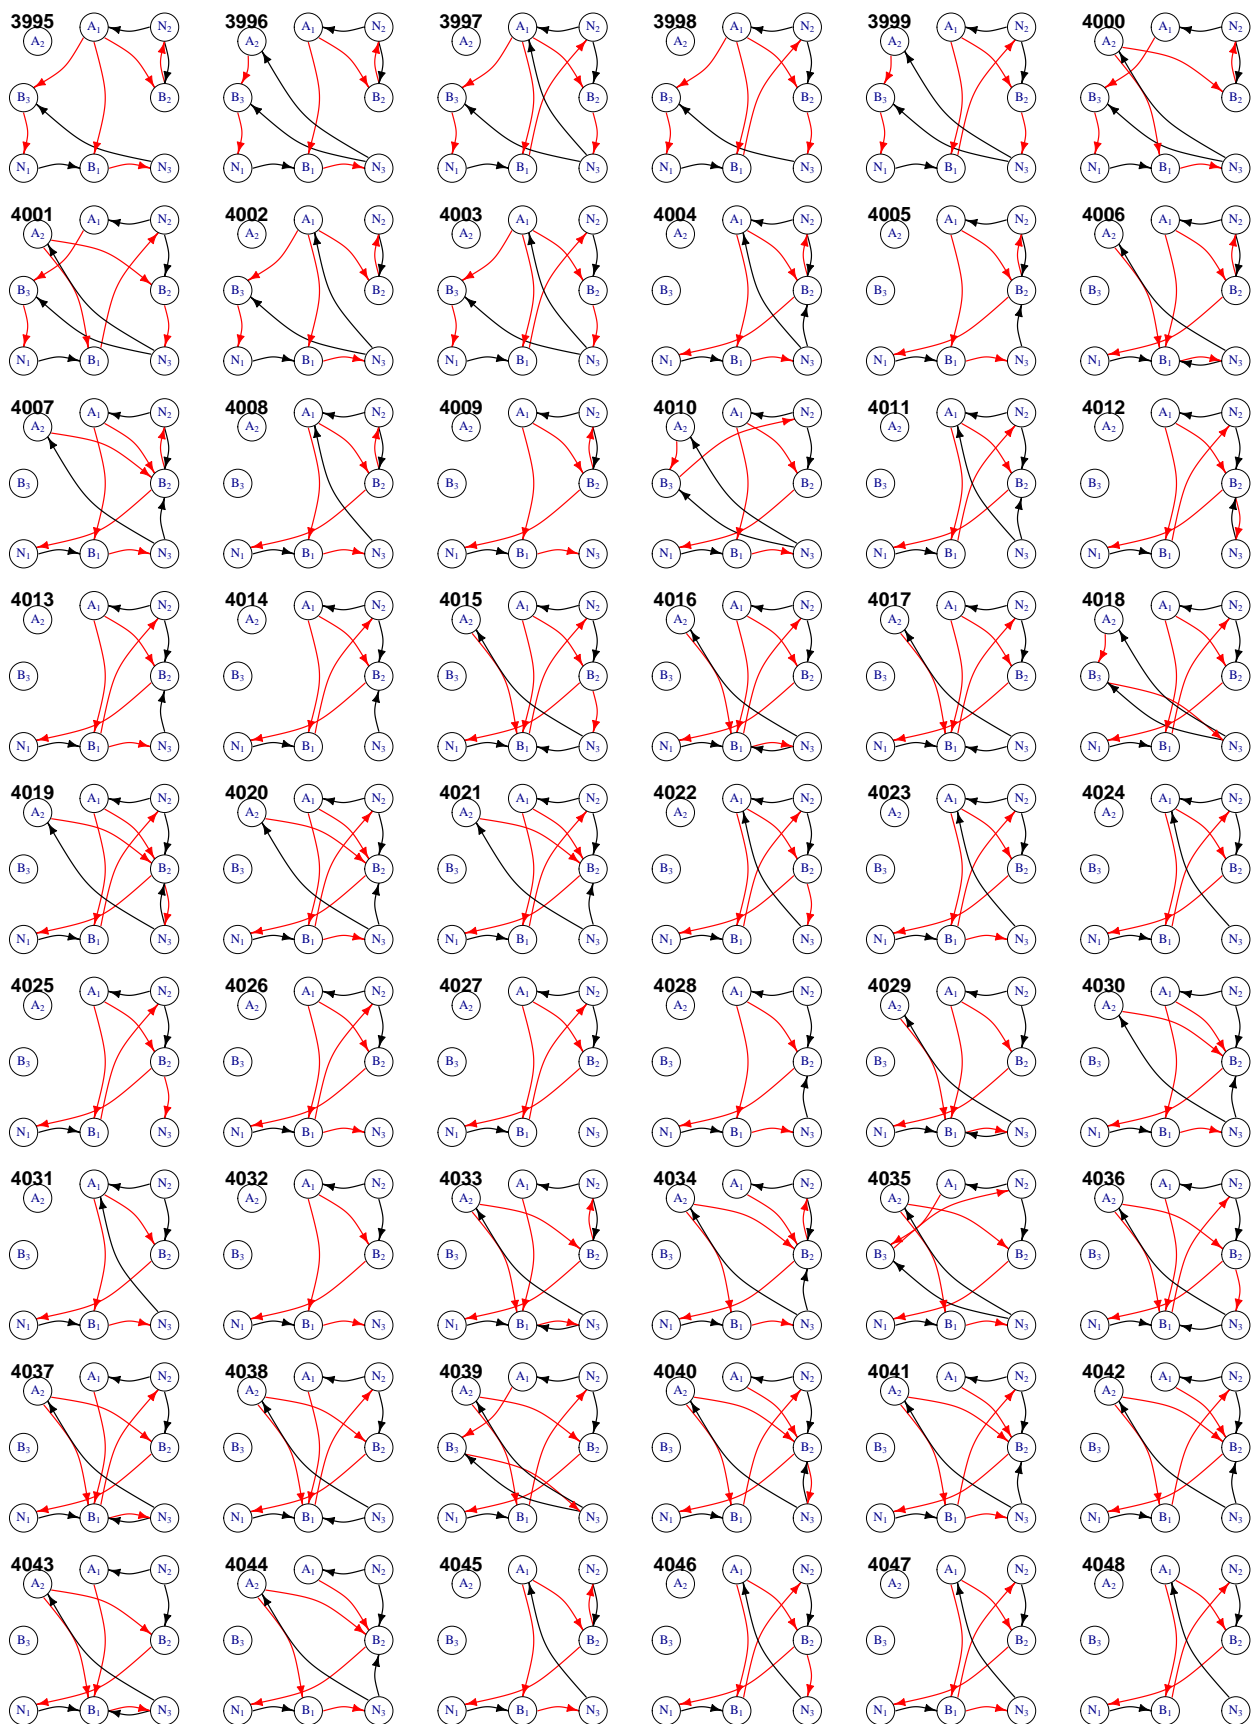

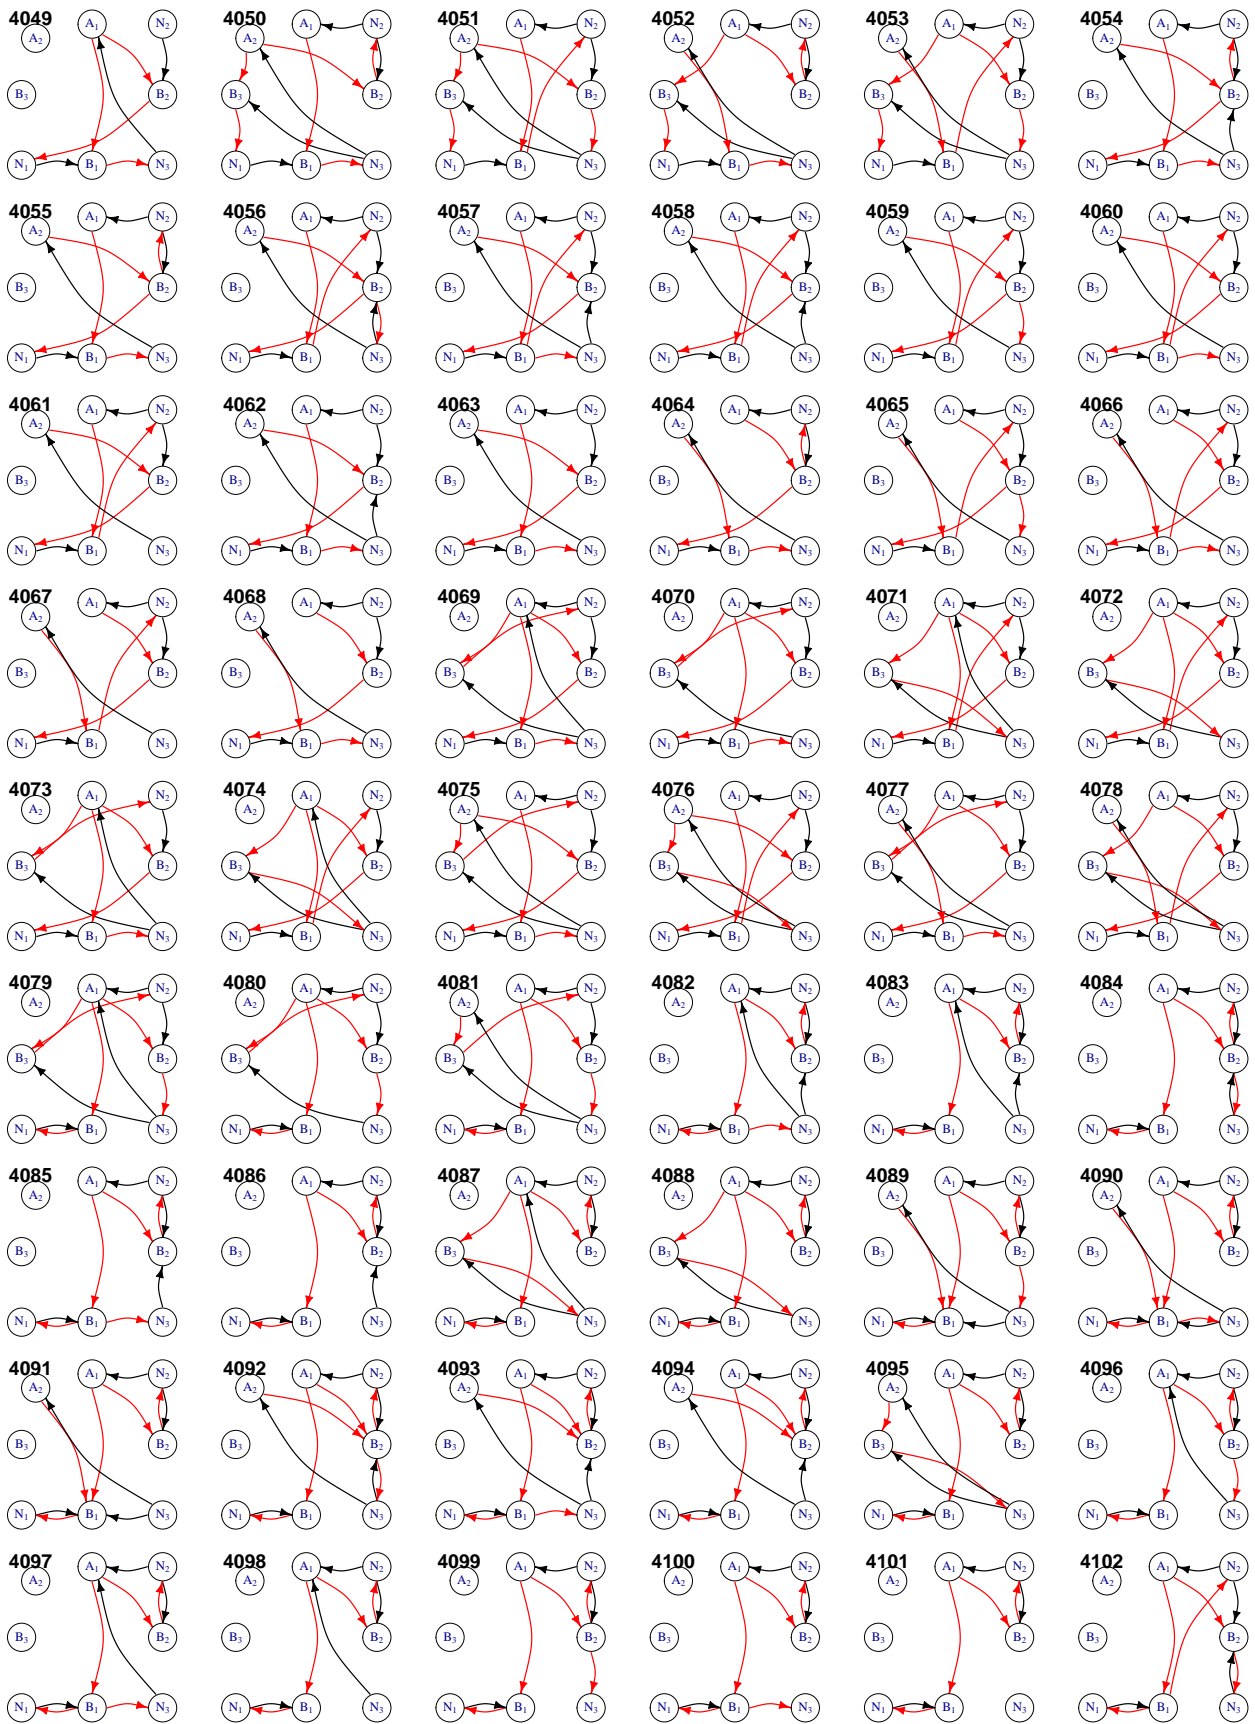

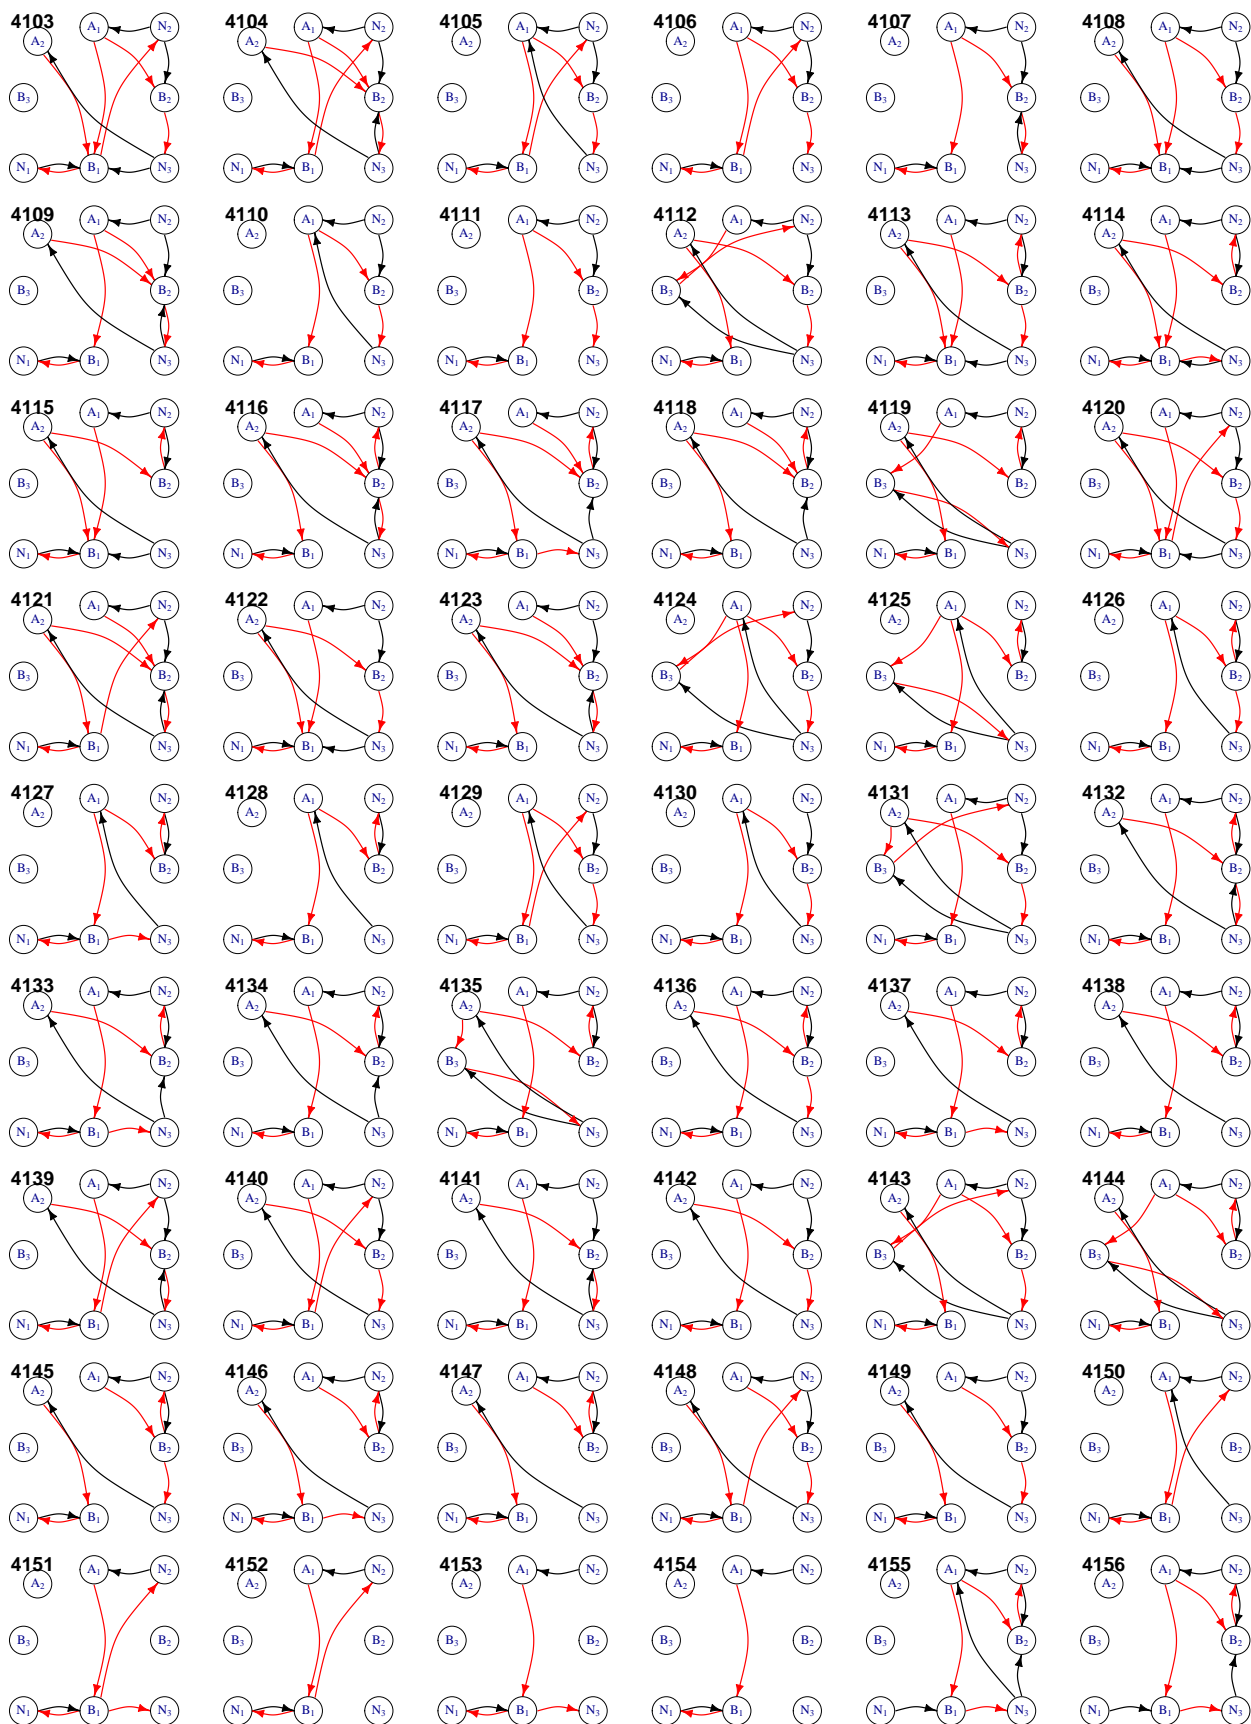

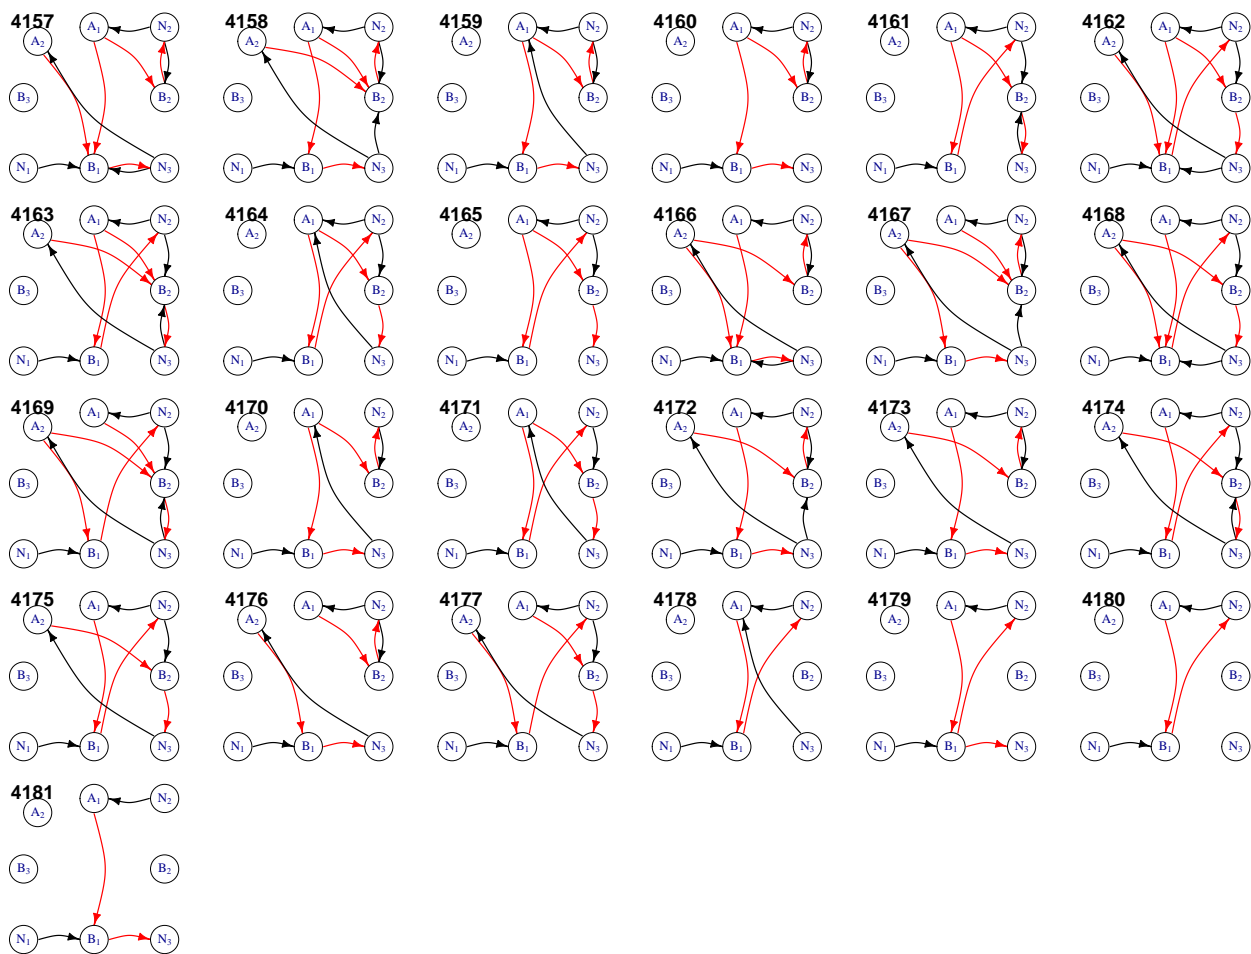

Supplement: 41467_2020_20756_MOESM1_ESM.pdf [file 41467_2020_20756_MOESM1_ESM.pdf]
